# Supplementary material for: Cross-Species Analysis Defines the Conservation of Anatomically-Segregated VMH Neuron Populations
Source: bioRxiv preprint, doi:10.1101/2021.04.16.439833, version 1 (2021-04-18)
Supplement: Supplemental Table 9 [file 439833_file05.csv]

Gene	Esr1_1	Esr1_2	Esr1_3	Dlk1_1	Dlk1_2	Fezf1_1	Fezf1_2	Lepr_1	Lepr_2	Lepr_3	Nfib_1	Nfib_2	Foxp2_1	Foxp2_2	Doublets_1	Doublets_2	Doublets_3
Phka2	0.05	0	0	0	0	0	0	0	0	0	0	0	0.08	0.17	0	0.13	0
Kif13a	0	0	0	0	0	0	0	0.13	0.29	0	0	0	0	0	0	0	0
Herc2	0	0.15	0.01	0	0	0	0	0	0	0	0	0	0.01	0	0	0.03	0
Fam214a	0	0	0	0	0.07	0	0	0	0	0	0	0	0	0	0	0.14	0
Plxna2	0	0	0	0	0.06	0	0.72	0	0.07	0.13	0	0	0	0.37	0.1	0	0.14
Usp13	0	0	0	0	0	0	0	0	0	0	0	0	0	0	0.3	0.04	0
Jakmip2	0.16	0.01	0.11	0.08	0	0.03	0	0	0	0	0	0	0	0	0	0.09	0
Xpr1	0	0	0	0.03	0	0.06	0.11	0	0	0.04	0	0	0	0	0.04	0	0
Adcy1	0.14	0	0	0	0.03	0	0	0	0	0	0.19	0	0.19	0	0	0.44	0
Echdc3	0	0	0	0	0	0	0	0	0	0	0	0	0	0	0	0	0
Acer2	0	0	0	0	0	0	0	0	0	0	0	0	0	0	0	0	0
Relt	0	0	0	0	0	0	0	0	0	0	0	0	0	0	0	0	0
Ptger4	0	0	0	0	0	0	0	0	0	0	0	0	0	0	0	0	0
Klf3	0	0	0	0	0	0.17	0	0	0	0.31	0.88	0	0	0.15	0	0	0
Lrrc8b	0	0	0	0	0	0	0	0	0	0	0	0	0	0	0	0	0
Wdr54	0	0	0	0	0	0	0	0	0	0	0	0	0	0	0	0	0
Masp1	0.79	0	0	0	0.96	0	0	0	0	0	0.68	0	0	0	0	0.55	0
Pdzrn4	0.43	0.54	0.48	0.1	0.22	0.29	0.2	0	0	0	0	0	0	0	0	0.05	0
Hacd2	0	0	0	0	0	0	0	0	0	0	0	0	0	0	0	0	0
Gipr	0	0	0	0	0	0	0	0	0	0	0	0	0	0	0	0	0
Ttc34	0	0	0	0	0	0	0	0	0	0	0	0	0	0	0	0	0
Sez6l	0	0.08	0	0	0.14	0.2	0.12	0	0	0	0	0	0.09	0.04	0	0	0
Radil	0	0	0	0	0.16	0	0	0	0	0.2	0	0	0	0	0	0.26	0
Tmem181a	0	0	0	0	0	0	0	0	0	0	0	0	0	0	0	0	0
Stt3b	0	0	0	0	0	0	0	0	0.05	0	0.12	0	0	0	0	0	0
Tdrd3	0	0	0.13	0	0	0	0	0	0.26	0	0	0	0	0	0	0.09	0
Hmcn2	0	0	0	0	0	0.08	0	0.91	0.8	0.92	0	0	0	0	0.01	0	0
Suco	0	0	0	0	0	0	0	0	0	0	0	0	0	0	0	0	0
Anxa11	0	0	0	0	0	0	0	0	0	0	0	0	0	0	0	0	0
Fads1	0	0	0	0	0	0	0	0.03	0	0	0.16	0	0	0	0	0.09	0
Nedd4	0	0	0	0	0	0	0	0	0	0	0	0	0	0	0	0	0
Mbip	0	0.39	0	0	0	0	0	0	0	0	0	0	0	0	0	0	0
Cmtm6	0	0	0	0	0	0	0	0	0	0	0	0	0	0	0	0	0
Asap1	0	0	0	0	0.1	0	0	0	0	0	0.16	0	0	0	0.16	0.27	0.13
Mgat5	0	0	0	0	0	0.13	0.06	0	0	0.03	0	0.08	0	0	0.1	0.11	0.14
Gadd45b	0	0	0	0	0	0	0	0	0	0	0	0	0	0	0	0	0
Ngef	0	0	0	0	0.03	0.11	0	0	0.05	0	0	0	0	0	0	0.07	0
Slc15a2	0	0	0	0	0	0	0	0	0	0	0	0	0	0	0	0	0
Fbn1	0	0	0	0	0	0	0	0	0	0	0.08	0.51	0.58	0	0	0.13	0
Elavl4	0	0.15	0	0.16	0	0	0	0	0	0	0	0	0	0	0	0.29	0.18
Wwc1	0.17	0.24	0.37	0	0	0	0	0	0	0	0	0	0.06	0	0	0	0
Ppt2	0	0	0	0	0	0	0	0	0	0	0	0	0	0	0	0	0
Trio	0	0	0	0	0	0	0	0	0	0	0	0	0	0	0	0	0
Adcyap1	0.4	0	0	0	0	0	0.07	0.33	0.12	0.07	0	0	0.13	0	0	0	0
Htr4	0.45	0.19	0.36	0.69	0.27	0.2	0	0	0	0	0	0	0	0	0	0	0
Bmp4	0.93	0.8	0	0	0	0	0	0	0	0	0	0	0	0	0	0	0
Grin2a	0.11	0	0	0	0	0.03	0	0.16	0	0	0.16	0	0	0	0.22	0.06	0.19
Mfsd2b	0	0	0	0	0	0	0	0	0	0	0	0	0	0	0	0	0
Klhl3	0	0	0	0	0	0	0	0	0	0	0	0	0	0	0	0	0
Hmgcll1	0	0	0	0	0	0	0	0	0	0	0	0	0	0	0	0	0
Prkcb	0.12	0	0	0.14	0	0.09	0.1	0.14	0	0.04	0	0	0.03	0.12	0.11	0	0
Arhgef12	0	0	0	0.12	0.13	0	0	0	0	0	0.06	0	0	0	0	0.24	0
Dok7	0	0	0	0	0	0	0	0	0	0	0	0	0	0	0	0	0
Itm2b	0	0	0	0	0	0	0	0.01	0	0.07	0.23	0.21	0	0	0.09	0	0.01
Pld2	0.61	0.16	0	0	0	0.24	0.39	0.07	0	0	0	0	0	0	0	0.17	0.19
Csde1	0	0	0	0	0	0	0	0	0	0	0	0	0	0	0	0	0
Pex14	0	0	0	0	0	0	0	0	0	0	0	0	0	0	0	0	0
Cpeb2	0	0	0	0	0	0.24	0.22	0	0	0	0	0.24	0	0.02	0	0	0
Nfia	0	0	0	0	0	0	0	0	0	0	0.99	0.34	0	0	0	0.25	0
Tmem80	0	0	0	0	0	0	0	0	0	0	0	0	0	0	0	0	0
Srpk2	0	0	0	0	0	0	0	0.14	0.04	0.16	0	0	0	0	0	0.18	0
Spatc1l	0	0	0	0	0	0	0	0	0	0	0	0	0	0	0	0	0
Laptm5	0	0	0	0	0	0	0	0	0	0	0	0	0	0	0	0	0
Il5ra	0	0	0	0	0	0.38	0	0.37	0.48	0	0	0	0	0.05	0.57	0.41	0.75
Tomm40	0	0	0	0	0	0	0	0	0	0	0	0	0	0	0	0	0
Sgip1	0	0	0	0	0	0.05	0	0.17	0.2	0.15	0	0	0	0.16	0	0.1	0
Prkch	0	0	0	0	0	0.39	0	0	0	0	0	0	0.72	0.38	0	0.15	0
Mxi1	0	0	0	0	0	0	0	0	0	0	0	0	0	0	0	0	0
Mical2	0.42	0.44	0.34	0.33	0	0	0.35	0	0	0	0	0	0	0	0	0.16	0
Sorcs1	0.31	0.19	0.17	0	0.19	0.35	0	0	0	0	0	0.43	0	0.44	0.18	0.03	0
Ubxn4	0	0	0	0	0	0	0	0	0	0	0	0	0	0	0	0	0
Ptprn	0	0	0	0.01	0.17	0	0	0	0	0	0	0	0	0	0.08	0.21	0
Cnot4	0	0	0	0	0	0	0	0	0	0	0	0	0	0	0	0	0
Nanos3	0	0	0	0	0	0	0	0	0	0	0	0	0	0	0	0	0
Carmil1	0	0	0.08	0	0	0	0	0	0	0	0.02	0	0	0.01	0	0.13	0
Neto1	0	0	0	0	0	0.17	0	0	0	0	0	0.25	0.8	0.05	0	0.02	0.03
Sybu	0	0.11	0.03	0.19	0.19	0	0.14	0	0.08	0.13	0	0	0	0	0.18	0.12	0
Tpbg	0.02	0	0	0	0	0	0.36	0	0.28	0	0.16	0	0	0.54	0	0.07	0.75
Snx30	0	0	0	0	0	0	0	0	0	0	0	0	0	0	0	0	0
Rcl1	0	0	0	0	0	0	0	0	0	0	0	0	0	0	0	0	0
Rgs14	0	0	0	0	0	0.09	0	0.29	0.27	0	0	0	0.36	0.16	0	0	0
Mta3	0	0	0	0	0	0	0	0	0	0	0	0	0	0	0	0	0
AI661453	0	0	0	0	0	0	0	0	0	0	0	0	0	0	0	0	0
Slc38a4	0	0	0	0	0	0	0	0	0	0	0	0	0	0	0	0	0
Shank3	0	0	0	0	0	0	0	0	0	0	0	0	0	0	0	0	0
Lhfp	0	0	0	0	0	0	0.73	0	0	0	0	0	0.77	0	0	0.25	0.71
Galnt12	0	0	0	0	0	0	0	0	0.35	0	0	0	0.52	0	0.38	0.07	0.01
Ggh	0	0	0	0	0	0	0	0	0	0	0	0	0	0	0	0	0
Slc12a8	0	0	0	0	0	0	0	0	0	0	0	0	0	0	0	0	0
Pfkfb4	0.01	0	0	0	0	0	0	0.08	0	0	0	0	0	0	0	0	0
Dock5	0	0	0	0	0	0.56	0.46	0	0	0	0	0.06	0	0	0	0.32	0.92
Atp8a2	0	0	0	0	0	0.18	0.17	0.18	0.11	0.11	0	0	0	0	0.04	0	0
Lin7a	0.13	0.09	0	0.25	0.14	0.5	0	0	0	0	0	0	0.09	0	0	0.2	0
Ino80c	0	0	0	0	0	0	0	0	0	0	0	0	0	0	0	0	0
Dgkk	0	0.56	0.93	0.78	0.08	0	0	0	0	0	0	0	0	0	0.05	0.7	0
Dock10	0	0.23	0.19	0	0	0.08	0	0	0.35	0	0	0	0.47	0.33	0	0	0.12
Galnt18	0	0	0	0	0	0.24	0.33	0.31	0.14	0.11	0	0	0	0	0	0	0.24
Sox9	0	0	0	0	0	0	0	0	0	0	0	0	0	0	0	0	0
Myo5c	0.36	0.36	0.77	0	0	0	0	0	0	0	0	0	0	0	0	0	0
Aven	0	0	0	0	0	0	0	0	0.52	0	0.07	0	0.11	0	0	0	0
Tom1l1	0	0	0	0	0	0	0	0	0	0.05	0	0.09	0	0	0	0	0
Dync1i2	0	0	0	0	0	0	0	0	0.1	0	0	0	0.13	0.19	0	0	0
Cdk5rap3	0	0	0	0	0	0	0	0	0	0	0	0	0	0	0	0	0
Phf21b	0	0	0	0	0	0	0	0	0	0	0	0	0	0	0	0	0
Wnt2	0	0	0	0	0	0	0	0	0	0	0	0	0	0	0	0	0
Lin28b	0.03	0.34	0.44	0	0	0	0	0	0	0	0	0	0	0	0	0	0
Nnmt	0	0	0	0	0	0	0	0	0	0	0	0	0	0	0	0	0
Arap2	0.04	0.44	0.56	0.34	0.41	0.44	0.38	0	0	0	0	0	0	0	0	0.27	0
Tmem246	0	0	0	0	0.12	0	0	0	0	0	0	0	0	0	0	0.25	0
D16Ertd472e	0	0	0	0	0	0	0	0	0	0	0	0	0	0	0	0	0
Pgd	0	0	0	0	0	0	0	0	0	0	0	0	0	0	0	0	0
Glcci1	0	0	0	0	0	0	0	0	0	0	0	0	0	0	0	0	0
Sipa1l2	0	0	0	0	0	0.02	0.59	0	0	0	0	0	0	0	0	0.36	0
Hebp1	0	0	0	0	0	0	0	0	0	0	0	0	0	0	0	0	0
Jcad	0	0	0	0	0	0	0	0	0	0	0	0	0	0	0	0	0
Ffar4	0	0	0	0	0	0	0	0	0	0	0	0	0	0	0	0	0
Pid1	0	0.49	0	0	0	0.67	0.36	0	0	0	0.21	0	0	0	0	0	0
Rffl	0	0	0	0	0.02	0	0	0	0	0.28	0	0	0	0	0.27	0.37	0
Nedd4l	0.21	0.26	0.28	0	0	0	0	0.04	0	0	0	0	0	0	0	0.08	0
Slc6a7	0.1	0.24	0.04	0	0.21	0	0	0	0	0	0	0	0	0	0.22	0.03	0.07
Agfg2	0	0	0	0	0	0	0	0	0.11	0	0	0	0.02	0.45	0	0	0
9430015G10Rik	0	0	0	0	0	0	0	0	0	0	0	0	0	0	0	0	0
Wdr78	0.03	0	0	0	0.2	0	0	0	0	0	0	0	0	0.1	0	0.02	0
Fads3	0	0	0	0	0	0	0	0	0	0	0	0	0	0	0	0	0
Fhl1	0	0	0	0	0	0	0	0	0	0	0	0	0	0	0	0	0
Lrig1	0	0	0	0	0	0	0	0	0	0.01	0.22	0.77	0.3	0.47	0	0.2	0
Camk2a	0.18	0.17	0.17	0	0.11	0	0	0	0	0	0	0	0	0	0	0.06	0
Pcgf3	0	0	0	0	0	0	0	0	0	0	0	0	0	0	0	0	0
Cast	0	0	0	0	0	0	0	0	0	0	0	0	0	0	0	0	0
Anks1b	0.22	0.23	0.22	0.21	0	0.18	0.19	0.12	0.23	0	0.21	0	0	0.15	0	0	0.19
Abracl	0.15	0.24	0.58	0	0	0.09	0	0	0	0	0	0	0.3	0.01	0	0.16	0.01
Ttll7	0	0	0	0	0	0	0	0	0	0	0	0	0	0	0	0	0
Tcp11l2	0	0	0	0	0	0	0	0	0	0	0	0	0	0	0	0	0
Taf1d	0	0	0	0	0	0	0	0	0	0	0	0	0	0	0	0	0
Adamts9	0.07	0	0	0	0	0.97	0	0.97	0.62	0.28	0	0	0	0	0	0.2	0
Ttc23l	0	0	0	0	0	0	0	0	0	0	0	0	0	0	0	0	0
Tmem132e	0	0	0	0	0.25	0	0	0	0	0.19	0.32	0	0	0	0.41	0.04	0
Med12l	0	0	0	0	0	0.1	0	0	0	0.1	0	0	0	0.05	0.13	0	0
Sept10	0	0	0	0	0	0	0	0.27	0	0.01	0	0	0	0.49	0.04	0.47	0
Arhgap21	0	0	0	0	0	0	0	0	0	0	0	0	0	0	0	0	0
Jup	0	0	0	0	0	0	0	0	0	0	0	0	0	0	0	0	0
Cmtm8	0	0	0.53	0	0	0	0	0	0.67	0.14	0	0	0	0	0	0.15	0.35
Kif6	0	0	0	0.46	0	0	0.69	0	0.15	0	0	0	0	0	0	0.13	0
Pkhd1	0	0	0	0	0	0	0	0	0	0	0	0	0	0	0	0	0
Batf	0	0	0	0	0	0	0	0	0	0	0	0	0	0	0	0	0
Mtus2	0	0	0	0	0	0.08	0	0	0	0.14	0	0	0.07	0	0.19	0	0.09
Inpp1	0	0	0	0	0	0	0	0	0	0	0	0	0	0	0	0	0
Mettl4	0	0	0	0	0	0	0	0	0	0	0	0	0	0	0	0	0
Frmpd4	0.16	0	0.06	0	0	0.17	0	0	0.31	0.19	0	0	0.16	0.18	0.24	0.15	0.09
Efna5	0.41	0.45	0.45	0	0.21	0	0	0.44	0	0	0	0.45	0	0.29	0	0.24	0
Tbpl1	0	0	0	0	0	0	0	0	0	0	0	0	0	0	0	0	0
Cfap58	0	0	0	0	0	0	0	0	0	0	0	0	0	0	0	0	0
P2ry1	0	0	0	0	0	0	0	0	0	0	0	0	0	0	0	0	0
Trim67	0	0	0	0	0	0	0	0	0	0	0	0	0	0	0	0	0
Slc6a19	0	0	0	0	0	0	0	0	0	0	0	0	0	0	0	0	0
Col18a1	0.78	0.75	0.62	0	0.89	0	0	0	0	0	0	0	0	0	0	0.18	0
Prkcq	0	0	0	0	0	0	0	0	0	0	0	0	0	0	0	0	0
Htr7	0.93	0.83	0.55	0.64	0.61	0	0	0	0	0	0	0	0	0	0	0.1	0
Synpr	0	0.07	0.86	0	0	0	0	0	0	0.17	0	0	0	0.58	0.85	0.63	0
Zfp536	0	0	0	0	0	0	0	0	0	0	0.69	0.79	0	0.05	0.53	0.69	0.45
Rasgrp2	0.47	0.32	0.03	0.48	0.42	0	0	0	0	0	0	0	0	0	0.38	0.05	0.39
Sez6l2	0	0	0	0	0	0	0	0	0	0	0	0	0	0	0	0	0
Smarcc1	0	0	0.06	0	0	0	0	0	0	0	0	0	0	0	0	0.11	0
Bcl11a	0.47	0.79	0.72	0	0	0.71	0	0.67	0	0	0	0	0	0.16	0.04	0	0
Mpdz	0	0	0	0	0	0	0	0	0.02	0	0.14	0	0	0	0	0	0
Fam168a	0.15	0	0	0.13	0	0.09	0.04	0.01	0	0	0	0	0	0.03	0	0.02	0
Akap10	0	0	0	0	0	0	0	0	0	0	0	0	0	0	0	0	0
Fstl5	0.6	0.67	0.18	0.78	0.16	0	0.38	0	0	0	0	0	0	0	0	0.38	0
Mapk9	0	0	0	0	0	0	0	0	0	0	0	0	0	0	0	0	0
Inpp5b	0	0	0	0	0	0	0	0	0	0	0	0	0	0	0	0	0
Wnt5a	0	0	0	0	0	0	0.74	0	0.42	0	0.89	0	0	0.38	0	0	0.55
Wsb1	0	0.03	0	0	0	0	0	0	0	0	0	0	0.09	0	0	0.05	0
Piezo2	0	0	0	0	0	0	0	0	0	0	0	0	0	0	0	0	0
Ttc22	0	0	0	0	0	0	0	0	0	0	0	0	0	0	0	0	0
Epdr1	0	0	0	0	0	0	0	0	0	0	0	0	0	0	0	0	0
Ttll11	0	0	0	0	0	0	0	0	0	0	0	0	0	0	0	0	0
Zmym2	0	0	0	0.01	0	0	0	0	0	0	0	0	0	0.07	0	0.07	0
Sparcl1	0	0	0	0	0	0	0	0	0	0	0	0.27	0	0	0	0	0.1
Epha6	0	0.22	0.18	0.86	0.61	0	0.29	0	0	0.12	0	0	0	0	0.21	0.21	0
Slk	0	0	0	0	0	0	0	0	0	0	0	0	0	0	0	0	0
Nppc	0	0	0	0	0	0	0	0	0	0	0	0	0	0	0	0	0
Cecr2	0	0	0	0	0	0	0	0	0	0	0	0	0	0	0	0	0
Prkar1b	0	0	0	0	0	0	0	0	0	0	0	0	0	0	0	0	0
Neto2	0.76	0.24	0.52	0	0	0	0	0	0	0	0	0	0	0	0	0.41	0
Prkg1	0.2	0.24	0.24	0	0	0.23	0.19	0	0.1	0	0	0	0.19	0.23	0	0	0.2
Slit2	0	0.1	0	0	0	0.33	0	0.43	0.73	0.52	0	0	0	0	0	0.19	0
Eml4	0	0.01	0	0	0	0.1	0	0	0	0	0	0	0	0	0	0.01	0
Ptk2	0.17	0.06	0	0	0	0	0	0	0	0	0	0	0	0	0	0.16	0
Parn	0	0	0	0	0	0	0	0	0	0	0	0	0	0	0	0	0
Fhod3	0	0	0	0	0	0.07	0	0.18	0.08	0.32	0.3	0	0	0.15	0.11	0	0.01
Inpp5f	0	0	0	0	0	0	0	0	0	0	0	0	0	0	0	0	0
Atp8b2	0	0	0	0	0	0	0	0	0	0	0	0	0	0	0	0	0
Ppat	0	0	0	0	0	0	0	0	0	0	0	0	0	0	0	0	0
Abo	0	0	0	0	0	0	0	0	0	0	0	0	0	0	0	0	0
Plxdc2	0	0	0.16	0.82	0.48	0	0	0	0	0	0	0	0.36	0.2	0	0	0
Rnf180	0	0	0	0	0	0	0	0.17	0	0.13	0	0	0	0	0.07	0	0
Chpt1	0	0	0	0	0	0	0	0	0	0	0	0	0	0	0	0	0
Fras1	0	0	0	0	0.11	0	0	0	0	0	0.05	0	0.88	0.9	0	0.69	0
Ctdspl	0	0	0.03	0.09	0	0	0	0.04	0	0	0	0	0	0.12	0	0	0
Spef2	0	0	0	0.65	0.42	0	0.82	0	0	0.37	0	0	0	0	0	0	0
Pde4a	0.2	0.17	0.18	0.4	0	0.12	0	0	0	0	0	0	0	0	0	0.01	0
Btbd10	0	0	0	0	0	0	0	0	0	0	0	0	0	0	0	0	0
Smchd1	0	0	0	0	0	0	0	0	0	0	0	0	0	0	0	0	0
St18	0	0	0	0	0	0	0	0	0.9	0	0.96	0	0	0	0	0.7	0
Arl15	0.12	0.08	0	0.19	0	0.19	0.1	0	0	0	0	0	0.04	0.38	0	0	0
Nacc2	0	0	0	0	0	0	0	0	0	0	0	0	0	0	0	0	0
Rcsd1	0	0	0	0	0	0	0	0	0	0	0	0	0	0	0	0	0
Gadd45a	0	0	0	0	0	0	0	0	0	0	0	0	0	0	0	0	0
Cpeb4	0	0	0	0	0	0	0	0	0	0	0	0	0	0	0	0	0
Spon1	0	0	0	0.31	0	0	0.21	0	0	0	0.75	0	0	0.07	0	0.35	0
Sh3bgrl2	0	0.29	0	0	0	0	0	0	0	0	0	0	0.74	0	0.44	0.67	0
Lrba	0	0	0	0	0	0	0	0	0	0	0	0	0	0	0	0	0
Mphosph9	0	0	0	0	0	0	0	0	0	0	0	0	0	0	0	0	0
Appl2	0.24	0.05	0	0	0.37	0	0.03	0	0	0	0	0	0	0	0	0	0
E130308A19Rik	0	0.04	0	0	0	0	0	0.05	0	0	0	0	0	0	0	0.46	0
Dhrs2	0	0	0	0	0	0	0	0	0	0	0	0	0	0	0	0	0
Cwc27	0	0	0	0	0.04	0	0	0	0	0	0	0.17	0	0	0.08	0.21	0
D430041D05Rik	0.15	0.22	0.14	0.08	0.15	0.2	0	0.22	0	0	0	0	0	0	0	0	0
Scn4b	0	0	0	0	0	0	0	0	0	0	0	0	0	0	0	0	0
Mapk10	0.15	0	0	0	0	0.06	0.01	0.11	0.15	0.04	0	0	0	0	0	0.09	0
Npr1	0	0	0	0	0	0	0	0	0	0	0	0	0	0	0	0	0
Rassf8	0	0	0	0	0	0	0	0	0	0.1	0	0	0.26	0.13	0	0	0
Ift43	0.02	0	0	0	0	0	0	0	0	0	0	0	0	0	0	0.07	0
Opa1	0	0	0	0	0	0	0	0	0	0	0	0	0	0	0	0	0
Galnt7	0	0	0	0	0	0	0	0	0	0	0.02	0	0.04	0.28	0	0.16	0
Nlk	0	0.17	0.03	0.05	0	0.05	0	0	0	0	0	0	0	0	0	0.23	0
Bicc1	0	0	0	0	0	0	0.07	0.36	0	0	0	0	0	0	0	0.25	0
Hsd17b2	0	0	0	0	0	0.14	0.66	0.87	0.3	0.37	0	0	0	0.22	0	0.28	0
Lhfpl3	0	0.23	0.21	0	0	0.21	0.13	0.25	0.22	0.22	0	0	0.07	0.23	0	0	0
Mamdc2	0.53	0.9	0.47	0.58	0.11	0	0	0	0	0	0	0	0	0	0	0.72	0
Mlip	0	0	0	0	0.41	0	0	0.28	0.59	0	0.01	0	0	0	0	0.12	0.04
Impg1	0	0	0	0	0	0	0	0	0	0	0	0	0	0	0	0	0
Tcaf2	0	0	0	0	0	0	0	0	0	0	0	0	0	0	0	0	0
Whrn	0	0	0.26	0	0	0.01	0	0.01	0.43	0	0.87	0	0	0	0	0	0
Dcun1d3	0	0	0	0	0	0	0	0	0	0	0	0	0	0	0	0	0
Spry4	0	0	0.13	0.29	0	0	0	0	0	0	0.66	0.61	0.55	0.03	0	0	0
Map4k3	0	0	0	0	0.15	0	0	0	0	0	0	0.08	0	0.05	0	0.1	0
Rhoj	0.26	0	0.3	0	0.89	0	0	0	0.15	0	0	0	0	0	0	0.11	0
Rps6kc1	0	0	0	0	0	0	0	0	0	0	0	0	0	0	0	0	0
Plod2	0	0	0	0	0	0	0.53	0	0	0	0.01	0.19	0.15	0	0	0.33	0
Dpysl3	0	0	0	0	0	0	0	0	0	0	0	0.63	0.08	0	0.19	0.04	0.35
Gls	0	0	0	0	0	0	0	0	0	0	0	0	0	0	0	0	0
Cnot6l	0	0	0	0	0	0	0	0	0	0	0	0	0	0	0	0	0
Jak1	0	0	0	0	0	0	0	0	0	0	0	0	0	0	0	0	0
P2rx4	0	0	0	0	0	0	0	0	0	0	0	0	0	0	0	0	0
Birc3	0	0	0	0	0	0	0	0	0	0	0	0	0	0	0	0	0
Tspan4	0	0	0	0	0	0	0	0	0	0	0	0	0	0	0	0	0
2510009E07Rik	0	0.26	0	0	0	0.5	0	0	0	0	0	0	0	0	0	0.08	0
Mre11a	0	0	0	0	0	0	0	0	0	0	0	0	0	0	0	0	0
Bank1	0	0	0	0	0	0	0	0	0	0	0	0	0	0	0	0	0
Col12a1	1	0.22	0	0.09	0	0	0	0	0	0	0	0	0	0	0	0	0
Slc27a2	0	0	0	0	0.03	0	0	0.02	0	0	0	0	0	0	0.17	0.06	0
Cttnbp2	0	0.19	0	0	0	0.26	0	0.21	0.2	0.17	0	0	0	0	0.18	0.06	0
Fam122c	0	0	0	0	0	0	0	0	0	0	0	0	0	0	0	0	0
Pcnx2	0	0	0	0	0	0	0	0	0	0	0	0	0	0	0	0	0
Ryk	0	0	0	0	0	0	0	0	0	0	0	0	0	0	0	0	0
Elk3	0	0	0	0	0	0	0	0	0.5	0	0	0	0	0.08	0	0.08	0.29
Klhdc10	0.13	0.16	0.11	0.04	0	0.09	0	0	0	0	0	0	0	0	0	0	0
Slc39a10	0	0	0	0	0	0	0.24	0.01	0	0	0	0	0	0	0	0.01	0
Dennd4c	0	0	0	0	0	0	0	0	0	0.06	0	0	0.19	0.14	0	0	0
Stox2	0	0	0	0	0	0	0	0	0	0.02	0	0.12	0	0	0	0.1	0
Prlr	0.82	0.54	0.37	0.74	0.39	0	0.1	0	0	0	0	0	0.1	0	0	0	0
Slc25a12	0	0	0	0	0	0	0	0	0	0	0	0	0	0	0	0	0
Ptpn5	0	0.19	0	0	0	0	0	0	0	0	0.12	0.13	0.17	0.02	0.01	0	0.06
Dip2b	0.12	0	0.03	0	0	0	0	0.13	0	0	0	0	0	0	0	0.08	0
Kif21b	0	0	0	0	0	0	0	0	0	0	0	0	0	0	0	0	0
Cachd1	0	0	0	0	0	0	0	0	0	0	0.85	0	0	0	0.68	0.23	0.53
Asic2	0	0	0	0	0.21	0	0.17	0.23	0	0	0.19	0	0.23	0.24	0.12	0.11	0
Sox4	0	0	0	0.16	0.44	0	0.11	0	0	0	0	0.37	0	0	0	0	0
Osbpl10	0	0	0	0	0	0	0	0	0	0	0	0	0	0	0	0	0
Sgms2	0	0	0	0	0	0	0	0	0	0	0	0	0	0	0	0	0
Tmem268	0	0	0	0	0	0	0	0	0	0	0	0	0	0	0	0	0
Il18r1	0	0	0	0	0	0	0	0	0	0	0	0	0	0	0	0	0
Acvr2a	0.02	0.05	0	0	0.07	0.25	0.33	0	0	0	0	0	0.01	0.52	0	0	0
Cep70	0	0	0	0	0	0	0	0	0	0	0	0	0	0	0	0	0
Inf2	0.18	0.9	0	0	0	0	0	0	0.14	0	0	0	0	0.46	0	0.45	0
Vps8	0	0	0	0	0	0	0	0	0	0	0	0	0	0	0	0	0
Kcnb1	0	0	0	0	0	0	0	0	0	0	0	0	0	0	0	0	0
Dbnl	0	0	0	0	0	0	0	0	0	0	0	0	0	0	0	0	0
Pald1	0	0	0	0	0	0	0	0	0	0	0	0	0	0	0	0	0
Clic5	0	0	0	0	0	0	0	0	0	0	0	0	0	0	0	0	0
Fam135a	0	0	0	0	0	0	0	0	0	0	0	0	0	0	0	0	0
Zfp385b	0.12	0	0.47	0	0	0	0	0	0.13	0	0	0	0.47	0.07	0.59	0	0
Stk33	0	0	0	0	0	0	0	0	0	0	0	0	0	0	0	0	0
Cutc	0	0	0	0	0	0	0	0	0	0	0	0	0	0	0	0	0
Dmd	0	0.21	0.15	0.22	0.18	0.13	0	0.21	0.22	0.05	0	0	0.22	0	0	0.13	0
Polr2b	0	0	0	0	0	0	0	0	0	0	0	0	0	0	0	0	0
Mycl	0	0	0	0	0	0	0	0	0	0	0	0	0	0	0	0	0
Grap2	0	0	0	0	0	0	0	0	0	0	0	0	0	0	0	0	0
Ajap1	0.06	0.08	0	0	0	0.02	0.08	0.33	0	0	0	0	0	0.17	0	0	0
Jam3	0	0.03	0	0	0.05	0.05	0	0	0	0	0	0	0	0	0	0	0
Gas2	0	0	0	0	0	0	0	0	0	0	0	0	0	0	0	0	0
Atg16l1	0	0	0	0	0	0	0	0	0	0	0	0	0	0	0	0	0
Usp32	0	0	0	0	0	0	0	0	0	0	0	0	0	0	0	0	0
Nkpd1	0	0	0	0	0	0	0	0	0	0	0	0	0	0	0	0	0
Tmem143	0	0	0	0	0	0	0	0	0	0	0	0	0	0	0	0	0
Unc5c	0.19	0	0	0	0	0	0.14	0.26	0.19	0.2	0.24	0	0	0	0	0	0
Hapln2	0	0	0	0	0	0	0	0	0	0	0	0	0	0	0	0	0
Phldb2	0	0	0	0	0	0	0	0	0	0	0	0	0	0	0	0	0
Slc16a6	0	0	0	0	0	0	0	0	0	0	0	0	0	0	0	0	0
Nr5a1	0	0	0	0	0	0.22	0	0.33	0.52	0.63	0.57	0.14	0	0	0.38	0	0
Onecut1	0	0	0	0	0	0	0	0	0	0	0	0	0	0	0	0	0
Bicd1	0	0	0	0	0	0	0	0	0	0	0	0	0	0	0	0	0
Ccdc88a	0	0	0	0	0	0	0	0	0	0	0	0	0	0	0	0	0
Adam11	0.25	0.14	0.03	0	0.09	0	0	0.15	0	0	0	0	0	0	0	0	0
Syne2	0.19	0.02	0	0	0	0	0	0.56	0.49	0.18	0	0	0	0	0	0	0
Lhx5	0	0	0	0.89	0.58	0	0.15	0	0	0	0.31	0.01	0.38	0	0	0.12	0.45
Epb41	0	0	0	0	0	0.07	0	0	0	0.01	0	0	0	0	0.17	0	0
Slc38a7	0	0	0	0	0	0	0	0	0	0	0	0	0	0	0	0	0
Sec14l5	0	0	0	0	0	0	0	0	0	0	0	0	0	0	0	0	0
Bach2	0.15	0.04	0	0.4	0.27	0	0.21	0	0	0	0.11	0.03	0	0	0	0.48	0
Fam20c	0	0	0	0	0	0	0	0.15	0.17	0.36	0	0	0	0	0	0.02	0
Synpo	0.01	0	0	0	0	0.02	0	0	0.42	0	0	0	0	0	0	0	0.25
Car2	0	0	0	0	0	0	0	0	0	0	0	0	0	0	0	0	0
Steap3	0	0	0	0	0	0.74	0	0.38	0.09	0.41	0.39	0	0	0.81	0	0	0
Atp6v1c2	0	0	0	0	0	0.37	0.01	0	0.41	0	0	0	0.67	0.68	0	0	0
Crocc	0	0.04	0.05	0	0.1	0	0	0.01	0	0	0	0	0	0	0	0	0
Ppp6r3	0	0	0	0	0	0	0	0	0	0	0	0	0	0	0	0	0
Greb1l	0	0.14	0.51	0	0	0	0	0	0	0	0.15	0.29	0.03	0	0.08	0	0.1
Col19a1	0.31	0	0	0	0.88	0	0	0.17	0	0.13	0	0	0	0	0.24	0	0
Gpr171	0	0	0	0	0	0	0	0	0	0	0	0	0	0	0	0	0
Kdm4c	0	0	0	0	0	0	0	0	0	0	0	0	0	0	0	0	0
Fbxo16	0	0	0	0	0	0	0	0	0	0	0	0	0	0	0	0	0
St8sia2	0	0	0	0	0.46	0.31	0	0.52	0.91	0.23	0	0	0	0	0	0.13	0
Fam107b	0	0	0	0	0	0	0	0	0	0	0	0	0	0	0	0	0
Hspa12a	0	0	0	0	0	0	0	0	0	0	0	0	0	0	0	0	0
BC052040	0	0	0	0	0	0	0	0	0	0	0	0	0	0	0	0	0
Slc35f1	0.36	0.23	0	0	0.02	0.17	0.13	0	0	0	0	0	0.12	0.1	0.22	0.22	0.2
Duox1	0	0	0	0	0	0	0	0	0	0	0	0	0	0	0	0	0
Kcnk3	0	0	0	0	0	0	0	0	0	0	0	0	0	0	0	0	0
Myo6	0	0	0	0	0	0	0.07	0	0.15	0	0	0	0	0	0	0.2	0
Snx29	0	0	0	0	0	0	0	0	0	0	0.03	0.08	0	0	0	0.24	0
Camk1g	0	0	0	0	0	0	0	0.27	0.56	0.36	0	0	0	0.41	0	0.1	0.03
Tesk2	0	0	0	0	0	0	0	0	0	0	0	0	0	0	0	0	0
Ptprg	0.19	0.21	0.21	0	0.24	0.13	0	0	0	0.15	0	0	0.41	0.09	0.21	0	0
Grem2	0	0	0	0	0	0	0.41	0	0	0	0.07	0	0	0.28	0.83	0.1	0
Pls3	0	0	0	0	0	0	0.16	0.06	0.5	0.25	0	0	0	0.03	0	0.19	0
Arhgef7	0	0	0	0	0	0	0	0	0	0	0	0	0	0	0	0	0
Tmem132c	0.39	0.51	0.58	0.35	0	0	0.02	0	0	0	0.67	0	0	0	0	0	0
Pde3a	0	0	0	0	0	0	0	0	0.64	0	0	0	0.97	0.23	0	0.06	0
Cbln2	0.19	0.38	0.8	0.26	0.34	0	0	0	0	0	0	0	0	0	0	0.42	0.5
Kazn	0.12	0.28	0	0	0.01	0	0.35	0	0	0	0	0	0	0	0	0	0
Ank	0	0	0	0	0	0.08	0	0.06	0	0	0	0	0	0.02	0	0	0
Mvk	0	0	0	0	0	0	0	0	0	0	0	0	0	0	0	0	0
Cd70	0	0	0	0	0	0	0	0	0	0	0	0	0	0	0	0	0
Bag3	0	0	0	0	0	0	0	0	0	0	0	0	0	0	0	0	0
Nap1l1	0	0	0	0	0	0	0	0	0	0	0	0	0	0	0	0	0
Slc8a1	0	0	0	0.07	0.03	0	0.19	0	0	0	0.05	0	0.18	0	0.16	0.02	0
Eps8	0	0	0	0.14	0	0.06	0	0.35	0.56	0	0	0	0	0	0	0	0
Adcy8	0	0	0	0.95	0.59	0	0.62	0	0	0	0.51	0	0.07	0	0.2	0.45	0
Trdmt1	0	0	0	0	0	0	0	0	0	0	0	0	0	0	0	0	0
Muc1	0	0	0	0	0	0	0	0	0	0	0	0	0	0	0	0	0
Vav2	0.51	0	0.13	0	0	0	0	0	0.05	0	0.48	0.3	0	0	0	0.22	0
Lep	0	0	0	0	0	0	0	0	0	0	0	0	0	0	0	0	0
Gstm5	0	0	0	0	0	0	0	0	0	0	0	0	0	0	0	0	0
Kank2	0	0	0	0	0	0	0	0	0	0	0	0	0	0	0	0	0
Pdzd7	0	0	0	0	0	0	0	0	0	0	0	0	0	0	0	0	0
Galc	0	0	0	0	0	0	0	0	0	0	0	0	0	0	0	0	0
Zfp804a	0	0.43	0.58	0.71	0.5	0	0.61	0	0	0	0.52	0	0	0	0	0	0.2
Hlcs	0	0	0	0	0	0	0	0	0	0	0	0	0	0	0	0	0
Dna2	0	0	0	0	0	0	0	0	0	0	0	0	0	0	0	0	0
Creg2	0	0	0	0	0	0	0	0	0	0	0	0	0	0	0	0	0
Syt14	0	0	0.16	0	0	0	0	0	0	0	0	0	0	0	0	0.12	0
Jhy	0.27	0.02	0.08	0.55	0	0	0	0	0	0	0	0	0.78	0	0	0.63	0
Gsk3b	0	0	0	0	0	0	0	0	0	0	0	0	0	0	0	0	0
Kcnip1	0	0	0	0	0.04	0	0	0	0.31	0.22	0.26	0	0.19	0.31	0.23	0.18	0.19
Insr	0	0	0	0	0	0	0	0	0	0	0	0	0	0	0	0	0
Scg2	0.16	0.11	0	0	0.2	0	0	0.02	0	0	0.14	0.07	0	0	0	0.15	0.16
Mrps5	0	0	0	0	0	0	0	0	0	0	0	0	0	0	0	0	0
Slc6a17	0	0	0	0	0	0	0	0	0	0	0	0	0	0	0	0	0
Fnbp1	0	0	0	0	0	0	0	0	0	0	0	0	0	0	0	0	0
Rxra	0	0	0	0	0	0	0	0	0	0	0	0	0	0	0	0	0
Lnx1	0	0	0	0	0	0	0.04	0.02	0.49	0.05	0.08	0.03	0	0	0.08	0.16	0
Wwp1	0	0	0	0	0	0	0	0.3	0	0.48	0	0	0	0	0.03	0.07	0
Tmem159	0	0	0	0	0	0	0	0	0	0	0	0	0	0	0	0	0
Galnt1	0	0	0	0	0	0	0	0	0	0	0	0	0.22	0.03	0	0.04	0
Pnpla3	0.02	0.03	0.42	0.11	0	0	0	0	0	0	0	0	0	0	0	0	0
Zfp618	0	0	0	0	0	0	0	0	0.01	0.15	0	0	0.3	0	0	0	0
Ubb	0	0	0	0	0	0	0.01	0	0.02	0.04	0.2	0.17	0	0	0	0	0.19
Sgcg	0	0	0	0	0	0	0	0	0	0	0	0	0	0	0	0	0
Moxd1	0	0.79	0.94	0	0	0	0	0	0	0	0	0.33	0	0	0	0.38	0
Dnmbp	0	0	0	0	0	0	0	0	0	0	0	0	0	0	0	0	0
Mapkap1	0	0	0	0	0	0	0	0	0	0	0	0	0	0	0	0	0
Neurl1b	0	0	0	0	0	0	0	0	0	0	0	0	0	0	0	0	0
Wipf3	0	0	0	0	0	0.3	0	0	0	0.08	0	0	0	0.66	0	0.03	0
Agpat4	0	0	0	0	0	0	0	0	0	0	0	0	0	0	0	0	0
Gclc	0	0	0	0	0	0	0	0	0	0	0	0	0.11	0	0	0.19	0
Nuak1	0.15	0.2	0.23	0	0	0	0	0.05	0	0	0	0	0.15	0	0.13	0.15	0
Timp3	0	0	0	0	0	0	0	0	0	0	0.06	0.11	0	0	0	0.35	0
Zcchc2	0	0	0	0	0	0	0	0	0	0	0	0	0	0	0	0	0
Fmnl2	0	0	0	0	0.12	0	0	0	0	0	0.11	0.04	0.09	0	0.02	0.16	0.08
Mpo	0	0	0	0	0	0	0	0	0	0	0	0	0	0	0	0	0
Fam107a	0	0	0.29	0.42	0.34	0.29	0.28	0	0	0	0	0	0	0	0	0.17	0
Plscr4	0.02	0	0.21	0	0	0.7	0	0	0	0	0	0	0.4	0.42	0	0.19	0
Syt6	0.3	0.53	0.57	0	0	0.95	0	0	0	0.2	0	0	0	0	0	0	0
Sh3bp5	0	0	0	0	0.22	0	0	0	0	0	0.05	0	0	0	0.05	0.2	0
Snx25	0	0	0	0	0	0	0	0	0	0	0	0	0.01	0.06	0	0.12	0
Rgs6	0	0	0	0	0.23	0	0	0.04	0	0	0	0.94	0.82	0	0	0.11	0
Ino80	0	0	0	0	0	0	0	0	0	0	0	0	0	0	0	0	0
Itga7	0.81	0	0	0	0	0.05	0	0.19	0	0	0.61	0	0	0	0	0.43	0
Scaf11	0	0	0	0	0	0	0	0	0	0	0	0	0	0	0	0	0
Arpp21	0.2	0	0	0	0.21	0.05	0.34	0.21	0.14	0.21	0	0	0	0	0	0	0.28
Peli2	0	0.24	0.49	0.17	0	0.09	0	0	0	0	0	0	0	0	0	0.03	0
Ercc6	0	0	0	0	0	0	0	0	0	0	0	0	0	0	0	0	0
Cdan1	0	0	0	0	0	0	0	0	0	0	0	0	0	0	0	0	0
Igsf3	0.11	0.4	0.32	0.62	0	0.03	0	0	0	0.03	0	0	0	0.19	0	0.48	0
Htr2a	0.29	0	0	0	0	0	0	0	0	0	0.1	0.36	0.21	0.43	0	0	0
Eml3	0	0	0	0	0	0	0	0	0	0	0	0	0	0	0	0	0
Sbf2	0	0	0	0	0	0	0	0	0	0	0	0	0	0	0	0	0
Esyt3	0	0	0	0	0	0.07	0	0.34	0.84	0.48	0	0	0	0	0	0.12	0
Dlgap4	0	0	0	0	0	0	0	0	0	0	0	0	0	0	0	0	0
Dcbld2	0	0	0	0	0	0	0	0	0	0	0	0	0	0	0	0	0
Nipal2	0	0	0	0	0	0	0	0	0	0	0	0	0	0	0	0	0.02
Cyp19a1	0.45	0.48	0.92	0.21	0.88	0	0.13	0	0	0	0	0	0	0	0	0.18	0
Phldb1	0	0.28	0.07	0	0	0	0	0	0.17	0	0	0	0	0	0	0.41	0
Usp28	0	0	0	0	0	0	0	0	0	0	0	0	0	0	0	0	0
Dsel	0	0	0	0	0.13	0	0	0	0	0	0	0	0.48	0.06	0	0.21	0
Tmem243	0	0	0	0	0	0	0	0	0	0	0	0	0	0	0	0	0
Myo1e	0.29	0	0.1	0.14	0	0	0	0	0	0	0	0	0	0	0	0.95	0
Arhgef3	0	0	0	0	0	0	0	0	0	0	0	0	0	0	0	0	0
Robo2	0	0	0	0.21	0	0	0.22	0	0	0	0.15	0	0.45	0.09	0.25	0	0.31
Ergic1	0	0	0	0	0	0	0	0	0	0	0	0	0	0	0	0	0
Tbl1xr1	0.01	0	0	0	0	0	0	0	0	0	0	0	0.72	0	0	0.01	0
Cpped1	0	0	0	0	0	0	0	0	0	0	0	0	0	0	0	0	0
Btbd3	0	0	0	0	0	0	0	0	0	0	0	0	0	0	0	0	0
Cyp27a1	0	0	0	0	0	0	0	0	0	0	0	0	0	0	0	0	0
Tmem164	0	0	0.01	0.06	0	0	0	0	0	0	0.17	0.1	0.05	0.3	0	0.18	0
Slc8a2	0	0	0	0	0.12	0	0	0	0.1	0	0	0	0	0	0	0	0
Kcnip3	0	0.07	0	0.02	0	0	0	0	0	0	0.91	0.86	0.09	0	0	0.07	0.29
Fbxo21	0	0	0	0	0	0	0	0	0	0	0	0	0	0	0	0	0
Cdkal1	0	0	0	0	0	0	0	0	0	0	0	0	0	0	0	0	0
Irs4	0	0	0	0	0	0	0	0	0	0	0	0	0	0	0	0	0
Pkp1	0	0	0	0	0	0	0	0	0	0	0	0	0	0	0	0	0
Mettl15	0	0	0	0	0	0	0	0	0	0	0	0	0	0	0	0	0
Wnt9a	0	0	0	0	0	0	0	0	0	0	0	0	0	0	0	0	0
Hs3st2	0	0	0	0	0	0	0.11	0.96	0.51	0	0	0	0	0	0	0.08	0
B3glct	0	0	0	0	0	0	0	0	0.72	0	0.24	0	0.07	0.07	0	0.07	0
Ppfibp1	0.03	0	0	0	0	0	0.38	0	0	0	0	0	0.54	0.02	0	0	0.06
Sgsm1	0	0.03	0.13	0.07	0.12	0	0	0	0	0	0	0	0	0	0	0	0
Ids	0	0	0	0	0	0	0	0	0	0	0	0	0	0	0	0	0
Atg7	0	0	0	0	0	0	0	0	0	0	0	0	0	0	0	0	0
Adamts14	0	0	0	0	0	0	0	0	0	0	0	0	0	0	0	0	0
Ttll12	0	0	0	0	0	0	0	0	0	0	0	0	0	0	0	0	0
Nicn1	0	0	0	0	0	0	0	0	0	0	0	0	0	0	0	0	0
Syt1	0	0.17	0	0.23	0.04	0.22	0.24	0	0.23	0	0.18	0.23	0	0	0	0.08	0.23
Crip2	0	0	0	0	0	0	0	0	0	0	0	0	0	0	0	0	0
Sema5a	0	0	0	0	0	0	0	0	0.6	0	0.06	0.71	0.16	0	0	0	0
Ltbp1	0	0	0	0	0	0	0	0.68	0.2	0.88	0	0.65	0	0	0	0.36	0
Rspo2	0	0	0	0	0	0	0	0	0	0	0	0	0	0	0	0	0
Dhrs3	0	0	0	0	0	0	0	0	0	0	0	0	0	0	0	0	0
Agpat5	0	0	0	0	0	0	0	0	0	0	0	0	0	0	0	0	0
Adgrb2	0	0	0	0	0	0.05	0	0	0.01	0	0	0	0.14	0	0	0	0
Dysf	0	0	0	0	0	0	0	0.51	0	0.54	0	0	0.34	0.86	0	0.23	0
Lgals3bp	0	0	0	0	0	0	0	0	0	0	0	0	0	0	0	0	0
Cry1	0	0	0	0	0	0	0	0	0	0	0	0	0	0	0	0	0
Trib2	0.15	0	0.48	0.42	0.01	0	0.02	0	0	0	0.02	0	0	0	0	0.41	0
Vgll2	0	0	0	0.74	0	0	0	0	0.55	0	0.49	0	0	0	0.82	0	0.9
Fosl2	0	0	0	0	0	0	0	0	0	0	0	0	0	0	0	0	0
Prim2	0	0.16	0	0	0	0.58	0	0	0	0	0	0	0	0	0	0.06	0
Nr2f1	0.42	0.54	0	0	0	0.31	0	0.57	0.71	0	0	0	0	0	0	0.02	0.08
Cdon	0	0	0	0	0	0.06	0	0	0.42	0	0	0	0	0.1	0	0.17	0.01
Cxxc5	0	0	0	0	0	0	0	0	0	0	0	0	0	0	0	0	0
Prr16	0	0	0	0	0	0.03	0	0.87	0.87	0	0.43	0.04	0	0	0	0.19	0
Mad1l1	0	0.03	0	0	0	0.01	0	0	0	0.04	0	0	0	0.05	0	0.08	0
Itpr2	0	0	0.25	0	0	0	0	0.3	0	0.17	0	0	0	0	0	0.07	0
Il1rl2	0	0	0	0	0	0	0	0	0	0	0	0	0	0	0	0	0
Cdk17	0.25	0.08	0	0	0	0	0	0	0	0	0	0	0.09	0.41	0	0	0.14
Snx32	0	0	0	0	0	0	0	0.03	0	0	0	0	0	0	0	0.11	0
Parvb	0	0	0	0.29	0	0	0	0	0	0.24	0.03	0	0	0	0	0.5	0
Slc17a5	0	0	0	0	0	0	0	0	0	0	0	0	0	0	0	0	0
Slc7a4	0	0	0	0	0	0	0	0	0	0	0	0	0	0	0	0	0
Hmcn1	0	0.36	0	0	0	0.07	0	0	0	0	0	0	0	0	0.75	0.87	0.43
Lrp4	0	0	0	0	0	0	0	0	0	0	0	0	0	0	0	0	0
Grid2	0	0.1	0	0.21	0	0.09	0.2	0.09	0.24	0.24	0.21	0.22	0.22	0.17	0.24	0.17	0
Trim36	0.42	0.91	0.97	0.1	0	0	0	0	0	0	0	0	0	0	0	0	0
Elavl2	0.21	0.23	0.31	0.44	0.01	0	0	0	0	0	0	0.36	0	0	0.49	0.51	0
Skap2	0	0	0	0	0.38	0.13	0	0	0	0.93	0	0	0	0	0.61	0.12	0
Micu1	0	0	0	0	0	0	0	0	0	0	0	0	0	0	0	0	0
Slc38a1	0	0	0	0	0	0	0	0	0	0	0	0.13	0	0	0	0.32	0
Thy1	0	0	0	0	0	0	0	0	0	0.05	0	0	0	0	0	0	0
Rapgef2	0	0	0	0	0	0.03	0	0	0	0	0	0	0	0	0.12	0.07	0
Car3	0	0	0	0	0	0	0	0	0	0	0	0	0	0	0	0	0
Poln	0	0	0	0	0	0	0	0	0	0	0	0	0	0	0	0	0
Sntb1	0	0.3	0	0	0	0.31	0.46	0	0.03	0	0	0.12	0	0	0	0.04	0.27
Ptpn13	0.94	0	0.31	0	0	0	0	0	0	0	0	0	0	0	0	0.15	0
P2rx6	0	0	0	0	0	0	0	0	0	0	0	0	0	0	0	0	0
Rnf130	0	0	0	0	0	0	0	0	0	0	0	0	0	0	0	0	0
Dusp4	0	0	0	0	0	0	0	0	0	0	0	0	0	0	0	0	0
Lamp2	0	0	0	0	0	0.09	0	0	0	0	0	0	0	0	0	0.23	0
Vamp1	0	0	0	0	0	0	0	0	0	0	0	0	0	0	0	0	0
Isl1	0	0.52	0.87	0	0	0	0	0	0	0	0	0	0	0.77	0.36	0.4	0.35
Grik2	0.23	0.11	0	0.27	0.22	0.16	0.25	0.16	0	0	0.21	0	0	0	0	0.17	0.21
Ubash3b	0.29	0.4	0.44	0.09	0	0.07	0	0	0	0	0.04	0	0	0	0	0.47	0
Maf	0	0	0	0	0	0.88	0.94	0	0	0.75	0	0	0	0	0	0.17	0
Ptk2b	0	0	0	0	0	0.87	0	0	0.65	0	0	0	0	0.62	0	0	0
Kcnj2	0.61	0	0	0.64	0	0	0.38	0	0	0	0	0	0.26	0	0	0	0.08
Ing4	0	0	0	0	0	0	0	0	0	0	0	0	0	0	0	0	0
Mcf2l	0	0	0	0.12	0	0.08	0.02	0	0	0	0	0	0	0	0	0.01	0
Slc39a8	0	0	0	0	0	0	0	0	0	0	0	0	0	0	0	0	0
Evi5	0	0	0	0	0	0	0	0	0	0	0	0	0	0	0	0	0
Adgra2	0	0	0	0	0	0	0	0	0	0	0	0	0	0	0	0	0
Cradd	0	0	0	0	0	0	0	0	0	0	0	0	0	0	0	0	0
Abca7	0	0	0	0	0	0	0	0	0	0	0	0	0	0	0	0	0
Trim63	0	0	0	0	0	0	0	0	0	0	0	0	0	0	0	0	0
Ttc7b	0	0	0	0	0	0	0	0	0	0	0	0	0	0	0	0	0
Myo3a	0	0	0	0	0	0	0	0	0	0	0	0	0	0	0	0	0
Rgs8	0.31	0	0.21	0.03	0.21	0	0	0.21	0	0	0.48	0	0	0	0	0.01	0
Gpr176	0	0	0	0	0	0	0	0	0	0	0	0	0	0	0	0	0
Pde4d	0	0	0	0	0.22	0	0	0	0	0	0.48	0.26	0.3	0	0.23	0.24	0.18
Efnb2	0.49	0.43	0.36	0	0	0	0	0.05	0	0	0	0	0.29	0	0	0.12	0
Btbd9	0	0	0	0	0	0	0	0.02	0.05	0	0	0	0	0	0.06	0.16	0
Cpne6	0.15	0.18	0	0	0.01	0	0	0.05	0	0	0	0	0	0	0	0	0
Rhpn1	0.1	0.16	0	0	0	0	0	0	0	0	0	0	0.89	0.48	0	0	0
Slco2a1	0	0	0	0	0	0	0	0	0	0	0	0	0	0	0	0	0
Drc1	0.04	0	0	0	0	0	0	0	0.21	0.29	0	0	0	0	0	0.06	0
Plch1	0.46	0	0	0	0.13	0	0	0.39	0	0	0	0	0	0	0.52	0.65	0.51
Herc3	0	0.06	0	0.35	0	0	0	0	0	0	0	0	0	0	0	0.06	0
Nkx2-1	0.53	0.59	0.54	0.42	0	0.58	0.46	0	0	0	0	0	0	0	0	0	0
Fam102b	0	0	0	0.15	0	0	0.52	0	0	0	0.63	0	0	0	0	0.03	0
Mink1	0	0	0	0	0	0	0	0	0	0	0	0	0	0	0	0	0
Lhfpl2	0.05	0	0	0	0.79	0.15	0	0.03	0	0	0	0	0.27	0	0.37	0	0
Id2	0	0	0	0	0	0	0	0	0	0	0	0	0	0	0	0	0
Bbx	0	0	0.05	0.56	0.17	0	0	0	0	0	0	0	0	0.03	0	0.16	0
Chat	0	0	0	0	0	0	0	0	0	0	0	0	0	0	0	0	0
Khdrbs3	0	0.2	0.21	0.08	0.42	0.13	0	0	0	0	0	0	0	0.14	0.12	0	0
Kcnh3	0.42	0	0.06	0	0	0.89	0	0	0	0	0	0	0.76	0.04	0	0.13	0.25
Stc1	0	0	0	0	0	0	0	0	0	0	0	0	0	0	0	0	0
Laptm4b	0	0	0	0	0	0	0	0	0	0	0	0	0	0	0	0	0
Cdyl	0	0	0	0	0	0	0	0	0	0	0	0	0	0	0	0	0
Rere	0	0	0	0	0	0	0	0	0	0	0	0	0	0	0	0	0
Slc25a23	0	0	0	0	0	0.01	0	0.07	0	0.03	0	0	0	0.04	0	0.04	0
Mtss1	0	0.12	0.15	0.1	0.17	0	0	0	0	0	0	0	0.14	0	0.17	0.1	0
Actl6b	0	0	0	0	0	0	0	0	0	0	0	0	0	0	0	0	0
Nectin3	0	0	0	0	0.03	0.5	0	0.63	0.56	0.51	0	0	0	0	0	0	0
Pxdn	0	0	0	0	0	0	0	0	0	0	0	0	0	0	0	0	0
Angpt1	0	0.83	0	0	0	0	0	0	0	0	0.82	0.57	0	0	0	0.65	0
Smarca5	0	0	0	0	0	0	0	0	0	0	0	0	0	0	0	0	0
Smurf1	0	0	0	0	0	0	0	0	0	0	0	0	0	0.01	0	0.13	0
Tshz3	0	0.29	0	0	0.35	0	0	0	0	0	0.77	0	0	0	0	0.01	0
Arid2	0	0	0	0	0	0	0	0	0	0	0	0	0	0	0	0	0
Grm3	0	0	0	0.11	0.5	0	0	0.03	0	0.24	0	0	0.3	0.07	0.09	0.5	0
Haus6	0	0	0	0	0	0	0	0	0	0	0	0	0	0	0	0	0
Kirrel3	0	0.37	0.25	0	0.31	0.52	0.61	0	0	0	0.41	0.39	0	0	0	0.27	0.49
Abcc5	0	0	0	0	0	0	0	0	0	0	0	0	0	0	0	0	0
Aamdc	0	0	0	0	0	0	0	0	0	0	0	0	0	0	0	0	0
Frmd4b	0.24	0	0	0	0	0	0.18	0.08	0	0	0	0	0	0	0.63	0.05	0
Tubg1	0	0	0	0	0	0	0	0	0	0	0	0	0	0	0	0	0
Gprc5c	0	0	0	0	0	0	0	0	0	0	0	0	0	0	0	0	0
Cbfa2t2	0	0	0	0	0	0	0	0	0	0	0	0	0	0	0	0	0
Pitpnm2	0	0	0	0	0	0	0	0	0	0	0	0	0.26	0	0.15	0.31	0
Prkg2	0.8	0.07	0	0.13	0.43	0.25	0.8	0	0	0	0	0	0	0.04	0	0.05	0
Stil	0	0	0	0	0	0	0	0	0	0	0	0	0	0	0	0	0
Nhs	0	0.16	0.38	0	0	0	0	0	0	0.09	0	0	0.34	0.18	0.16	0.01	0
Bcar3	0	0	0	0	0	0	0	0	0	0	0	0	0	0	0	0	0
Cit	0	0	0	0	0	0	0	0	0	0	0	0	0	0	0	0	0
Deup1	0	0	0	0	0	0	0	0.24	0	0.37	0	0	0	0.13	0.62	0.16	0.02
Enc1	0	0	0	0	0	0	0	0	0	0	0	0	0	0	0	0	0
Il1rapl1	0	0	0	0.23	0.22	0.1	0.21	0.24	0.24	0.21	0.23	0.09	0	0.22	0.21	0.02	0
Palld	0	0	0	0.14	0.4	0	0	0	0	0.03	0	0.45	0	0	0	0.61	0
Pde1c	0.75	0.96	0.69	0	0	0	0.41	0	0	0	0	0	0	0	0	0.12	0
Aff2	0	0.47	0.52	0	0	0	0	0	0	0	0.29	0	0	0	0.04	0.03	0
Cdc42se2	0	0.08	0.05	0	0	0	0	0	0	0	0	0	0	0	0	0.12	0
March3	0	0	0	0	0	0	0	0	0.01	0	0.29	0.65	0	0.51	0.11	0.08	0
Igfbp4	0	0	0	0	0	0	0	0	0	0	0	0	0	0	0	0	0
Gpr149	0	0	0	0	0	0.7	0	0.74	0.66	0.19	0	0.06	0	0	0	0	0
Cog6	0	0	0	0	0	0	0	0	0	0	0	0	0	0	0	0	0
Gfra2	0.51	0	0	0	0	0.42	0	0.13	0.46	0	0	0	0	0	0	0.03	0
Gpc5	0.43	0.61	0.53	0	0.22	0.18	0	0	0	0	0	0	0.4	0.48	0	0.18	0
Gpr39	0	0	0	0.05	0.88	0	0.52	0.41	0.27	0	0	0	0	0	0	0.28	0
5730409E04Rik	0	0	0	0	0	0	0	0	0	0	0	0	0	0	0	0	0
Pla2g7	0	0	0	0	0	0	0	0	0	0	0	0	0	0	0	0	0
Cacnb4	0	0	0	0	0	0	0	0	0	0.2	0	0	0.15	0.14	0.12	0.13	0
Sgpp2	0	0	0	0	0.41	0	0	0	0	0.19	0	0	0	0.1	0	0	0.1
Tusc3	0	0	0	0	0	0	0	0	0	0	0	0	0	0	0	0	0
Opcml	0	0	0	0	0	0.24	0	0.32	0.56	0.43	0.14	0.17	0.11	0.21	0.25	0.24	0
Tet3	0	0	0	0	0	0	0	0	0	0	0	0	0	0	0	0	0
Wif1	0	0	0	0	0	0	0	0	0	0	0	0	0	0	0	0	0
Fcho2	0	0	0	0	0	0.27	0	0	0.14	0	0	0	0	0	0	0.31	0
Pbxip1	0	0	0	0	0.02	0	0	0.22	0.39	0	0	0	0	0	0	0.59	0
Pth2r	0.93	0	0.43	0.91	0	0	0.11	0	0	0	0	0	0.16	0	0	0.2	0
Syt5	0	0	0	0	0.11	0	0	0	0	0	0	0	0	0	0	0	0
Endou	0	0	0	0	0	0	0	0	0	0	0	0	0	0	0	0	0
Sgcd	0	0.19	0.18	0.09	0.2	0	0	0	0	0	0.66	0.52	0	0.21	0	0	0.17
Prrc2c	0	0	0	0	0.17	0	0	0.01	0	0	0	0	0.07	0.06	0	0.19	0
Xpc	0	0	0	0	0	0	0	0	0	0	0	0	0	0	0	0	0
Hs3st5	0	0.24	0	0	0	0.23	0.14	0	0	0.4	0	0	0.76	0.45	0.37	0.15	0
Ncald	0.17	0.25	0.38	0.44	0.18	0.07	0.17	0	0	0	0	0	0	0	0	0.2	0
Ccs	0	0	0	0	0	0	0	0	0	0	0	0	0	0	0	0	0
Maob	0	0	0	0	0	0	0	0	0	0	0	0	0	0	0	0	0
Mettl25	0	0	0	0	0	0	0	0	0	0	0	0	0	0	0	0	0
Mllt10	0	0	0	0	0	0	0	0	0	0	0	0	0	0	0	0	0
Abca5	0	0	0	0	0.01	0	0	0	0	0	0	0	0	0	0.11	0.3	0
Zbtb20	0	0	0.07	0	0	0.03	0.47	0	0	0	0.24	0.24	0.21	0.23	0	0.23	0.39
Slc22a15	0	0	0	0	0	0	0	0	0	0	0	0	0	0	0	0	0
Arid1b	0	0.02	0.17	0	0.01	0	0	0	0	0	0	0	0.1	0.08	0	0.03	0
Nwd2	0	0.09	0	0.83	0.85	0	0	0	0	0	0	0	0	0	0.89	0.32	0
Ska2	0	0	0	0	0	0	0	0	0	0	0.27	0	0.55	0.02	0	0.04	0
Elmod1	0.08	0	0	0	0.06	0	0	0	0	0.09	0.25	0	0	0	0.14	0.12	0.18
Pcsk2	0.15	0.22	0.18	0	0	0.29	0	0	0	0	0	0.31	0	0.06	0	0	0.22
Rell1	0	0	0	0	0	0	0	0	0	0	0	0	0	0	0	0	0
Far2	0	0	0	0	0	0	0	0	0	0	0	0	0	0	0	0	0
Smarca2	0	0	0.44	0	0	0	0	0	0	0.19	0	0.08	0	0	0.06	0.16	0
Trak2	0	0	0	0	0	0	0	0	0	0	0	0	0	0	0	0	0
Htra1	0	0	0	0	0	0	0	0	0	0	0	0	0	0	0	0	0
Gsn	0	0	0	0	0	0	0	0	0	0	0	0	0	0	0	0	0
Ocrl	0	0	0	0	0	0	0	0	0	0	0	0	0.19	0.16	0	0.09	0
Wdr27	0	0	0	0	0	0	0	0	0	0	0	0	0	0	0	0	0
Tgfbr1	0	0	0	0	0	0.63	0	0	0	0.55	0	0	0	0	0	0.13	0
Scn9a	0	0	0	0.17	0	0	0	0	0.07	0.08	0	0	0.36	0	0	0.24	0
Strbp	0.14	0	0	0.13	0	0.19	0.17	0.21	0.2	0.22	0.16	0.19	0.11	0.04	0.15	0.15	0.12
Slc27a4	0	0	0	0	0	0	0	0	0	0	0	0	0	0	0	0	0
Ank1	0	0	0.02	0.35	0.05	0	0	0	0	0	0.09	0	0	0	0.13	0.17	0
Morn1	0	0	0	0	0	0	0	0	0.01	0	0	0	0	0	0	0	0
Plekha1	0	0	0	0.03	0.08	0	0	0	0.02	0	0	0	0	0	0	0.25	0
Pcdh19	0	0	0	0	0	0	0	0	0	0	0.59	0.38	0	0	0.12	0	0.37
Prex2	0.17	0.11	0	0	0.93	0	0.17	0	0	0	0	0	0	0	0	0.51	0
Kcnj1	0	0	0	0	0	0	0	0	0	0	0	0	0	0	0	0	0
Csmd2	0	0	0.18	0.04	0.18	0	0	0	0	0	0.09	0	0	0.03	0	0.02	0.13
Pde4b	0.16	0.15	0.05	0.14	0.2	0.08	0.31	0	0	0	0.16	0	0	0	0	0.23	0
Slc39a13	0	0	0	0	0	0	0	0	0	0	0	0	0	0	0	0	0
Rab8b	0	0	0	0	0	0	0	0	0	0	0	0	0	0	0	0	0
Kl	0	0.47	0	0	0.26	0	0	0	0	0	0	0	0.95	0	0	0	0.5
Bmt2	0	0	0	0	0	0	0	0	0	0	0	0	0	0	0	0	0
Ptar1	0	0	0	0	0	0	0	0	0	0	0	0	0	0	0	0	0
Rabgap1l	0.2	0.1	0	0	0.02	0	0	0.09	0.03	0	0	0	0.01	0	0	0.13	0
Egfr	0.9	0	0.33	0	0	0	0.14	0	0	0	0	0	0.1	0	0	0.2	0
Lvrn	0	0	0	0	0	0	0	0	0	0	0	0	0	0	0	0	0
Nts	0	0	0	0	0	0	0	0	0	0	0	0	0	0	0	0	0
Zbtb46	0.07	0	0	0	0.36	0	0	0	0.1	0	0	0	0	0	0	0.13	0
Rhag	0	0	0	0	0	0	0	0	0	0	0	0	0	0	0	0	0
Klhl13	0.38	0.29	0	0	0	0.65	0	0	0	0	0	0	0	0	0	0.25	0
Wscd2	0.11	0	0	0	0	0.28	0	0	0	0	0	0	0	0.01	0	0	0
Rrp36	0	0	0	0	0	0	0	0	0	0	0	0	0	0	0	0	0
Pld5	0	0	0	0	0	0	0.62	0	0	0.18	0	0	0	0.04	0.71	0.18	0.85
Gria3	0.21	0.16	0	0	0.05	0.49	0.48	0	0	0	0	0.17	0	0	0	0	0.28
Gpr139	0.14	0	0	0	0	0.19	0	0.68	0.36	0.59	0	0.16	0	0	0	0.14	0
Ccdc88c	0	0	0.07	0	0	0	0	0	0	0.07	0.4	0.72	0.2	0	0.12	0.45	0
Stap2	0	0	0	0	0	0	0	0	0	0	0	0	0	0	0	0	0
Gramd1b	0	0.08	0.25	0	0	0	0	0	0	0	0	0	0	0	0.01	0.2	0.02
Cacna1e	0	0	0	0	0	0.02	0	0.19	0.18	0.05	0.13	0	0	0.19	0	0	0
Grm4	0.2	0	0	0	0	0.19	0	0	0	0.07	0.69	0	0	0	0	0	0
Tmem237	0	0	0	0	0	0	0	0	0	0	0	0	0	0	0	0	0
Tfr2	0	0	0	0	0	0	0	0	0	0	0	0	0	0	0	0	0
Snph	0	0	0	0	0	0	0	0	0	0	0	0	0	0	0	0	0
Etl4	0.51	0.32	0.22	0.89	0.77	0	0	0	0	0	0	0.04	0	0	0.09	0.41	0
Grik1	0.61	0	0.67	0	0.79	0	0	0	0	0	0	0.55	0	0.28	0.63	0.42	0
Cabp4	0	0	0	0	0	0	0	0	0	0	0	0	0	0	0	0	0
Manba	0	0	0	0.21	0.08	0	0	0	0.04	0	0	0	0	0	0	0.08	0
Slc22a1	0	0	0	0	0	0	0	0	0	0	0	0	0	0	0	0	0
Col4a5	0	0	0	0	0	0	0	0	0	0	0	0	0	0	0	0	0
Pwwp2a	0	0	0	0	0	0	0	0	0	0	0	0	0	0	0	0.16	0
Sned1	0	0	0	0	0	0	0	0.35	0.6	0.75	0	0	0	0	0	0.02	0
Sept9	0.1	0.04	0.02	0	0.03	0	0	0	0	0	0.71	0.12	0	0	0	0.38	0.09
Vwc2l	0.84	0	0.62	0.91	0	0	0	0	0	0	0	0	0	0	0	0.61	0
Chst1	0	0	0	0	0	0	0	0	0	0	0	0	0	0	0	0	0
Grin3a	0.42	0.51	0	0.66	0.65	0	0	0	0	0	0	0	0	0	0	0.12	0
Olfm1	0	0	0	0.08	0	0	0	0	0	0	0	0	0	0	0.06	0.1	0
Hectd2	0.01	0	0.54	0	0	0	0	0	0	0	0.21	0	0.28	0.07	0	0.16	0
Farp2	0	0	0	0	0.1	0	0	0	0	0	0	0	0	0	0.19	0	0
Zfp462	0	0	0.01	0.38	0	0	0.32	0	0	0	0	0	0.12	0.36	0.14	0.05	0
Slc35d1	0	0	0	0	0	0	0	0	0	0	0	0	0	0	0	0	0
Slco3a1	0.01	0.14	0	0	0	0.15	0	0	0	0	0	0	0	0	0	0	0.17
Car10	0.15	0	0	0	0	0.05	0.18	0.14	0.18	0.19	0.22	0.21	0	0.12	0.24	0	0.18
Cdk6	0.65	0	0.17	0	0	0	0.35	0.66	0	0.53	0	0	0	0	0	0	0
Gda	0	0	0	0	0	0.33	0.14	0.4	0	0	0	0	0.41	0.74	0	0	0
Srd5a3	0	0	0	0	0	0	0	0	0	0	0	0	0	0	0	0	0
Myo7a	0	0	0	0	0	0	0	0	0	0	0	0	0	0	0	0	0
Ttf1	0	0	0	0	0	0	0	0	0	0	0	0	0	0	0	0	0
Hey2	0	0	0	0	0	0	0	0	0	0	0	0	0	0	0	0	0
Cbr4	0	0	0	0	0	0	0	0	0	0	0	0	0	0	0	0	0
P2rx7	0	0	0	0	0	0	0	0	0	0	0	0	0	0	0	0	0
Chd7	0	0	0	0	0	0	0	0.12	0.04	0.83	0.9	0	0	0	0	0.62	0
Pou6f2	0	0.02	0.95	0	0.27	0	0	0	0	0	0	0.74	0.12	0.21	0	0.65	0
Slc15a1	0	0	0	0	0	0	0	0	0	0	0	0	0	0	0	0	0
Dgki	0.08	0	0	0.18	0	0.14	0	0.16	0	0	0	0	0	0	0.19	0.14	0
Serinc5	0.47	0	0.47	0	0	0	0	0	0	0	0	0	0	0	0	0.19	0
Trps1	0	0	0	0	0.06	0	0	0	0	0	0	0	0.48	0.49	0	0.43	0
Srpx2	0	0	0	0	0	0	0	0	0	0	0	0	0	0	0	0	0
Crhr1	0.28	0.53	0.5	0.47	0	0	0	0	0	0	0	0	0	0	0	0.86	0
Sec63	0	0	0	0	0	0	0	0	0	0	0	0	0	0	0	0	0
Satb2	0.91	0	0	0	0	0	0.08	0.95	0.79	0	0	0	0	0	0	0	0
Fign	0.63	0.1	0	0	0.87	0	0	0.92	0	0	0	0	0	0	0	0.02	0
Ddah1	0	0	0	0	0.11	0	0	0	0	0	0	0	0.07	0	0.04	0	0
Tcaim	0	0	0	0	0	0	0	0	0	0	0	0	0	0	0	0	0
Ism2	0	0	0	0	0	0	0	0	0	0	0	0	0	0	0	0	0
Ccdc77	0	0	0	0	0	0	0	0	0	0	0	0	0	0	0	0	0
Reln	0	0	0.76	0	0	0	0	0	0	0	0.98	0	0	0	0.28	0.18	0
Cdh12	0	0.23	0.39	0.91	0.6	0	0	0.09	0	0	0	0	0.11	0.75	0	0.02	0
Syndig1	0.91	0	0.17	0.75	0.65	0	0	0	0.11	0	0	0	0	0	0	0.47	0
Aatf	0	0	0	0	0	0	0	0	0	0	0	0	0	0	0	0	0
Smarca1	0	0	0	0	0	0	0	0	0	0	0	0	0	0	0	0	0
Galnt11	0	0	0	0	0	0	0	0	0	0	0	0	0	0	0	0	0
Ttll10	0	0	0	0	0	0	0	0	0	0	0	0	0	0	0	0	0
Trp53bp1	0	0.09	0.04	0	0.16	0	0	0	0	0	0	0	0	0	0	0.09	0
Phkb	0.08	0	0	0	0	0	0	0	0	0	0	0	0	0	0	0.14	0
Epb41l4a	0	0.79	0.11	0.69	0	0.25	0	0	0	0	0	0	0.14	0	0	0.18	0
Creb3l1	0	0.67	0.01	0.66	0	0	0	0	0	0	0.6	0.24	0	0	0	0.19	0
Cyb5r4	0	0	0	0	0	0	0	0	0	0	0	0	0	0	0	0	0
Wdr70	0	0	0	0	0	0	0	0	0	0	0	0	0	0	0	0	0
Zfp804b	0	0	0.13	0	0	0	0	0	0	0	0.86	0.64	0.73	0.29	0	0.23	0
Pdk1	0	0	0	0	0	0	0	0	0	0	0	0	0	0	0	0	0
Lamb1	0.04	0	0.14	0	0	0	0	0	0	0	0	0.12	0.9	0.41	0	0.15	0
Nrg4	0	0	0	0	0	0	0	0	0	0	0	0	0	0	0	0	0
Cep112	0	0.11	0	0	0.08	0.02	0	0	0	0.17	0	0	0	0.38	0.2	0.36	0
Vti1a	0	0	0	0	0	0.11	0	0	0	0.02	0	0	0.08	0	0	0	0
Cpz	0	0	0	0	0	0	0	0	0	0	0	0	0	0	0	0	0
Rgs17	0	0	0	0	0	0	0	0	0	0	0	0	0.12	0	0.01	0.16	0
Mycbp2	0	0	0	0	0	0	0	0	0	0	0	0	0	0	0	0	0
Htr3a	0	0	0	0	0	0	0	0	0	0	0	0	0	0	0	0	0
Rhbdd2	0	0	0	0	0	0	0	0	0	0	0	0	0	0	0	0	0
Micall1	0	0	0	0	0	0	0	0	0	0	0	0	0	0	0	0	0
Lhpp	0	0	0.3	0	0	0	0	0	0	0	0.76	0.3	0	0	0	0.16	0
Rassf5	0	0	0	0	0	0	0	0	0	0	0	0	0	0	0	0	0
Tcea3	0	0	0	0	0	0	0	0	0	0	0	0	0	0	0	0	0
Sv2b	0.57	0	0	0.64	0.74	0	0	0	0.08	0	0.64	0.41	0	0	0	0	0
Snx18	0	0	0	0	0	0	0	0	0	0	0	0	0	0	0	0	0
Sema6a	0	0	0	0	0.17	0	0	0.18	0.55	0.13	0	0	0	0	0.11	0.2	0
Cpne5	0.29	0.05	0	0.16	0.5	0	0	0	0	0	0	0.16	0.92	0	0.42	0.17	0
Ankrd46	0	0	0	0	0	0	0	0	0	0	0	0	0	0	0	0	0
Cops6	0	0	0	0	0	0	0	0	0	0	0	0	0	0	0	0	0
Smad3	0	0	0	0	0	0.36	0	0.47	0.6	0.77	0	0	0	0.03	0	0.02	0
Zfand4	0	0	0	0	0	0	0	0	0	0	0	0	0	0	0	0	0
Btbd11	0	0	0	0	0	0	0	0.17	0.07	0.04	0.14	0	0	0	0.07	0	0.04
Txndc16	0	0	0	0	0	0	0	0	0	0	0	0	0	0	0	0	0
Vrk1	0	0	0	0	0	0	0	0	0	0	0	0	0	0	0	0	0
Unc5b	0.02	0	0.4	0	0.97	0	0	0	0	0.16	0	0	0	0	0	0.43	0
Tuba8	0	0	0	0	0	0	0	0	0	0	0	0	0	0	0	0	0
St6galnac5	0.48	0.39	0	0	0.25	0	0	0.1	0	0.55	0	0	0	0	0	0	0
Sst	0.08	0	0	0	0.04	0	0	0	0	0	0.09	0	0	0	0	0	0.04
Cblb	0	0	0.03	0.04	0	0	0	0	0	0	0	0.03	0.13	0	0	0	0
Rspo3	0	0	0	0.72	0	0	0.59	0	0	0.16	0	0	0.81	0.16	0	0.15	0.82
Nab1	0	0	0	0	0.01	0	0.42	0.36	0.04	0	0	0	0	0	0	0.13	0
G0s2	0	0	0	0	0	0	0	0	0	0	0	0	0	0	0	0	0
Efnb3	0	0	0	0	0.42	0	0	0	0	0	0	0	0	0	0	0.06	0
Col2a1	0	0	0	0.79	0.99	0	0	0	0	0	0	0	0	0	0	0	0
Med14	0	0	0	0	0	0	0	0	0	0	0.04	0.05	0.05	0.22	0	0	0
Per2	0	0	0	0	0	0	0	0	0	0	0.52	0.59	0	0.11	0	0.39	0
Arhgap12	0	0	0	0	0	0	0	0	0	0	0	0	0	0	0	0	0
Ptprm	0	0.21	0.47	0	0	0.16	0.53	0.06	0	0.13	0	0	0.38	0.46	0.2	0.02	0.16
Spry2	0	0	0	0	0	0	0	0	0	0	0	0	0	0	0	0	0
Coro2b	0	0	0	0	0	0	0	0	0	0	0	0	0	0	0	0	0
Nell2	0.18	0	0.17	0.36	0	0	0.09	0	0	0.08	0	0	0	0	0.21	0	0
Scai	0.05	0	0.02	0.13	0.12	0	0	0	0	0	0	0	0	0	0	0	0
Vcan	0	0	0	0	0	0	0	0	0	0	0.32	0	0.99	0.08	0.77	0.11	0
Mbnl3	0.07	0	0	0	0	0	0	0	0	0.43	0	0	0.73	0	0	0.94	0
Syt16	0.08	0.19	0.16	0	0.08	0	0	0.05	0	0	0	0	0	0	0	0	0
Cttnbp2nl	0	0	0	0	0	0	0	0	0	0	0	0	0	0	0	0	0
Mapk4	0.13	0	0	0	0.07	0	0	0	0	0	0.87	0.05	0	0.4	0	0.15	0
Grik4	0	0.13	0.18	0	0.19	0.2	0.1	0	0	0	0	0	0	0	0.19	0	0
Sfmbt2	0.09	0.52	0.64	0.15	0	0	0	0	0	0	0	0	0.49	0.37	0	0.09	0
Nrg1	0	0	0	0	0.19	0	0	0.24	0.12	0.24	0.09	0	0.39	0	0.22	0.2	0.2
Plekhm3	0	0	0	0	0	0	0	0	0	0	0	0	0	0	0	0	0
Rorb	0	0.11	0.44	0.44	0	0	0.86	0	0	0.74	0	0	0	0	0.8	0.67	0
Ndnf	0	0	0	0	0	0	0	0	0	0	0	0	0	0	0	0	0
Dst	0	0.05	0	0.17	0.18	0	0.09	0	0	0	0.03	0	0	0	0.08	0.16	0
Bcl2l11	0	0	0	0.63	0	0	0	0	0	0	0.74	0.4	0	0	0	0.19	0.07
Pard6g	0	0	0	0	0	0	0	0	0	0	0	0	0	0	0	0	0
Naalad2	0	0	0	0	0	0	0	0	0	0	0	0	0	0	0	0	0
Dclk3	0.35	0	0	0	0.07	0.11	0	0	0	0	0	0	0.67	0.51	0	0.18	0
Napepld	0	0	0	0	0	0	0	0.37	0.59	0.9	0.72	0.12	0	0	0	0.06	0.05
Agbl4	0.18	0.17	0	0.05	0	0	0.13	0.15	0	0	0	0.14	0.17	0	0	0.22	0
Ccdc171	0	0	0.41	0	0	0.56	0	0	0	0	0	0	0	0.36	0.43	0.06	0
Ltbr	0	0	0	0	0	0	0	0	0	0	0	0	0	0	0	0	0
Tiparp	0.1	0.41	0.31	0	0.28	0	0	0	0	0	0	0	0	0	0	0.64	0
Esyt2	0	0	0	0	0	0	0	0	0	0	0	0	0.27	0.06	0	0	0
Ak7	0	0	0	0	0	0	0	0	0	0	0	0	0	0	0	0	0
Thbs4	0	0	0	0	0	0	0	0	0	0	0	0	0	0	0	0	0
Alox5	0	0	0	0	0	0	0	0	0	0	0	0	0	0	0	0	0
Gipc1	0	0	0	0	0	0	0	0	0	0	0	0	0	0	0	0	0
Rps6ka2	0	0	0	0	0	0.05	0	0.18	0.41	0.22	0	0	0	0	0	0	0
Slc38a10	0	0	0	0	0	0	0	0	0	0	0	0	0	0	0	0	0
Dera	0.32	0	0	0.58	0	0.12	0.02	0	0	0	0	0	0	0.88	0	0	0
Coro2a	0	0	0	0	0	0	0	0	0.41	0.35	0	0	0	0	0.01	0	0
Dscam	0.2	0.13	0	0.19	0.14	0.13	0.2	0.18	0	0	0	0	0	0	0.17	0.17	0.06
Cmya5	0	0	0	0	0	0	0	0	0	0	0	0	0	0	0	0	0
Stmn1	0	0	0	0	0	0	0	0	0	0	0	0	0	0	0	0	0
Prss53	0	0	0	0	0	0	0	0	0	0	0	0	0	0	0	0	0
Rexo2	0	0	0	0	0	0	0	0	0	0	0	0	0	0	0	0	0
Hsf4	0	0	0	0	0	0	0	0	0	0	0	0	0	0	0	0	0
Adamts3	0.31	0.04	0	0	0	0	0.55	0	0	0	0	0	0.7	0.73	0	0.1	0
Pkd2	0	0	0	0	0	0	0	0	0	0	0	0	0	0	0	0	0
Zeb1	0.21	0	0	0.07	0.06	0	0	0.04	0	0	0	0	0	0	0.18	0.11	0
Fam13b	0	0	0	0	0	0	0	0	0	0	0	0	0	0	0	0	0
Pcca	0	0	0	0	0	0	0	0	0	0	0	0	0.02	0.23	0	0.21	0
Fancc	0	0	0	0	0	0	0	0	0	0	0	0	0	0	0	0	0
Cers4	0.07	0	0	0.18	0.13	0	0	0	0	0	0	0	0	0	0	0.01	0
Crim1	0	0.25	0	0	0	0	0	0	0.3	0	0	0	0	0.15	0	0	0.11
Asap2	0	0.02	0	0.63	0	0	0	0	0	0	0.01	0	0	0	0	0	0
Tmpo	0	0	0	0	0	0	0	0	0	0	0	0	0	0	0	0	0
Exph5	0	0	0	0	0	0	0	0	0	0.43	0	0	0.97	0.49	0.2	0	0
Aig1	0	0	0	0	0	0	0	0	0	0	0	0.16	0.1	0.1	0	0.07	0
Nme4	0	0	0	0	0	0	0	0	0	0	0	0	0	0	0	0	0
Nxph1	0	0.12	0.26	0.62	0	0.24	0.11	0	0	0	0.84	0.76	0	0.38	0	0	0
Rprm	0.4	0.16	0.79	0.56	0.13	0	0	0	0	0	0	0	0	0.22	0	0	0
Dcc	0.05	0	0.24	0.09	0	0	0	0.16	0.38	0	0.49	0.43	0	0	0	0.23	0
Utrn	0	0	0	0	0.09	0.37	0.97	0	0	0	0	0	0	0.07	0	0.24	0.7
Fancb	0	0	0	0	0	0	0	0	0	0	0	0	0	0	0	0	0
Cep72	0	0	0	0	0	0	0	0	0	0	0	0	0	0	0	0	0
Gabbr2	0	0	0	0	0	0.13	0.13	0	0.1	0	0	0	0	0	0.12	0.08	0
Sfrp1	0	0	0	0	0	0	0	0	0	0	0	0	0	0	0	0	0
Sugct	0	0	0	0	0	0	0	0	0	0	0	0	0	0	0	0	0
Cyb5b	0	0	0	0	0	0	0	0	0	0	0	0	0	0	0	0	0
Mrps6	0	0	0	0	0	0	0	0	0	0	0	0	0	0	0	0	0
Bmp2k	0	0	0	0	0	0	0	0	0	0	0.71	0.08	0	0	0	0.18	0
Nlrp12	0	0	0	0	0	0	0	0	0	0	0	0	0	0	0	0	0
Bmp3	0.38	0	0	0	0	0	0	0	0	0	0.33	0.48	0.81	0.07	0.46	0.4	0
Thbs2	0	0	0	0	0	0	0	0	0	0	0	0	0	0	0	0	0
Ntrk2	0	0.01	0	0	0	0	0	0.11	0	0	0	0.05	0.19	0.18	0.03	0.23	0
Nrip3	0	0	0	0	0	0	0	0	0	0	0	0.37	0.3	0	0.47	0.12	0
Aatk	0	0	0	0	0	0	0	0	0	0	0	0	0	0	0	0	0
Anxa5	0	0	0	0	0	0	0	0	0	0	0	0	0	0	0	0	0
Npffr1	0	0	0	0.92	0	0.31	0.89	0	0	0	0	0	0	0	0	0	0
Scn1a	0	0	0	0	0	0	0	0.08	0	0	0.04	0	0.07	0.05	0	0	0
Klf8	0	0	0.25	0	0.17	0	0	0	0	0	0	0	0.31	0.03	0.11	0.08	0
Tmem178	0	0	0	0	0	0	0	0	0	0	0	0	0	0	0	0	0
Ddx17	0	0	0	0	0	0	0	0	0	0	0	0	0	0	0	0	0
L1cam	0	0	0	0	0	0	0	0	0	0	0	0	0	0	0	0	0
Dnah12	0.16	0	0	0	0	0.1	0	0.88	0.65	0.96	0	0	0	0	0	0	0
Pepd	0	0	0	0	0	0	0	0	0	0	0	0	0	0	0	0	0
Ryr2	0.17	0	0	0	0	0.16	0	0.09	0.03	0.09	0	0	0.08	0.12	0.08	0	0
Sgsm3	0	0	0	0	0	0	0	0	0	0	0	0	0	0	0	0	0
Tagln	0	0	0	0	0	0	0	0	0	0	0	0	0	0	0	0	0
Syne1	0.16	0.03	0	0.2	0.07	0	0	0	0	0	0	0.05	0	0	0	0.12	0
Hpse2	0	0	0	0	0	0	0	0	0	0	0	0	0	0	0	0	0
Ttyh2	0	0	0	0	0	0	0	0	0	0	0	0	0	0	0	0	0
Ankrd6	0	0	0.12	0	0	0	0	0	0	0.08	0	0	0	0	0	0	0
Rbm47	0	0	0	0	0	0	0	0	0	0	0	0	0	0	0	0	0
Rasgrf2	0	0	0	0	0	0	0	0.21	0.17	0.14	0	0	0.21	0.63	0.21	0	0
Galnt3	0.1	0	0	0	0	0.61	0.49	0	0.56	0.01	0	0	0	0	0	0.01	0
Cryl1	0	0	0	0	0	0	0	0	0	0	0	0	0	0	0	0	0
Cep83	0	0	0	0	0	0	0	0	0	0	0	0	0	0	0	0	0
Prkd1	0	0	0	0	0	0	0	0.64	0.79	0.94	0	0	0.71	0	0.55	0.11	0
Nfix	0	0	0	0	0	0	0	0	0	0	0.96	0.94	0	0	0	0.23	0
Nrcam	0	0	0	0	0	0	0.01	0.18	0.12	0	0	0	0	0.09	0	0.17	0
Ahi1	0.2	0.21	0.15	0.19	0.15	0.18	0.22	0.18	0.22	0.01	0.22	0.12	0.15	0.12	0.14	0.05	0.09
Akt3	0	0	0	0.13	0.16	0	0	0	0	0	0	0	0	0	0.15	0.17	0
Osbpl6	0.16	0	0	0.19	0.07	0.12	0.09	0	0	0	0	0	0	0.18	0.03	0.07	0
Lsamp	0.25	0.25	0.22	0.23	0.2	0.25	0	0.15	0.25	0.21	0.2	0	0	0	0.22	0.19	0
Car8	0	0	0	0	0	0	0	0	0	0	0	0	0	0	0	0	0
Glud1	0	0	0	0	0	0	0	0	0	0	0	0	0	0	0	0	0
Il1rapl2	0.56	0	0.59	0	0.93	0	0.07	0	0	0.13	0	0	0	0	0	0.57	0
Mid1	0	0	0	0	0	0	0	0	0	0	0.7	0	0	0	0.38	0	0
St7	0	0	0.11	0	0	0	0	0	0	0	0	0	0	0	0	0.18	0
Hhipl1	0	0	0	0	0	0	0	0	0	0	0	0	0	0	0	0	0
Frmpd2	0	0	0	0	0	0	0	0	0	0	0	0	0	0	0	0	0
Dnmt3a	0	0	0	0	0	0	0	0	0	0	0	0	0	0	0	0	0
Cpt1a	0	0	0	0	0	0	0	0	0	0	0	0	0	0	0	0	0
Plekhb1	0	0	0	0	0	0	0	0	0.46	0	0.22	0	0	0	0	0.25	0
Tshr	0	0	0	0	0	0	0	0	0	0	0	0.9	0.28	0	0	0	0.43
Bin1	0	0	0	0	0.08	0	0	0	0	0	0	0	0	0	0	0.15	0
Heg1	0	0	0	0	0	0	0	0	0	0	0	0	0	0	0	0	0
Rab39	0	0	0	0	0	0	0	0	0	0	0	0	0	0	0	0	0
Nr6a1	0	0	0	0	0	0	0	0	0	0.19	0	0.05	0	0.01	0.11	0.06	0
Trim9	0.04	0.07	0	0	0	0.01	0	0	0	0	0	0	0	0	0	0.06	0
Frmd4a	0	0	0	0.17	0.03	0.19	0.04	0.17	0.17	0.16	0.16	0	0.1	0.09	0.21	0.15	0
Tcaf1	0.12	0.08	0	0	0	0	0	0	0	0	0	0	0	0.1	0	0.16	0
Tpm3	0	0	0	0	0	0	0	0	0	0	0	0	0	0	0	0	0
Myc	0	0	0	0	0	0	0	0	0	0	0	0	0	0	0	0	0
Kcnmb4	0.22	0	0	0	0	0	0.19	0	0	0	0.18	0.04	0	0	0	0	0
Kbtbd12	0	0	0	0	0	0	0	0	0	0	0	0	0	0	0	0	0
Gpr22	0	0	0	0	0	0	0	0.36	0	0.05	0	0	0.09	0	0.31	0.15	0
Sufu	0	0	0	0	0	0	0	0	0	0	0	0	0	0	0	0	0
Sv2c	0	0.47	0.37	0	0.13	0.29	0	0	0.12	0	0	0	0	0.51	0	0.65	0
Chodl	0	0	0	0	0.49	0	0.86	0	0	0	0	0	0	0	0.17	0.45	0
Gpr137b	0	0	0	0	0	0	0	0	0	0	0	0	0	0	0	0	0
Ntsr1	0	0	0	0	0	0	0	0	0.1	0	0.74	0.64	0	0	0.84	0.17	0.23
Hs3st4	0.32	0	0.05	0	0.15	0.46	0.32	0.4	0.47	0.2	0	0	0	0	0.21	0	0
Cux1	0	0	0	0	0	0	0	0	0	0	0	0	0.06	0.15	0	0	0
Btbd1	0	0	0	0	0	0	0	0	0	0	0	0	0	0	0	0	0
Tmem266	0	0	0.08	0	0.34	0.12	0	0.17	0.25	0	0	0	0	0	0	0.03	0
Slc46a2	0	0	0	0	0	0	0	0	0	0	0	0	0	0	0	0	0
Tnks	0	0	0	0	0	0	0	0	0	0	0	0	0	0	0	0	0
Ropn1l	0	0	0	0	0	0	0	0	0	0	0	0	0	0	0	0	0
Syn3	0.12	0.02	0	0.14	0.05	0.07	0	0	0	0	0	0	0.08	0	0.1	0.16	0
Rapgef3	0.17	0.07	0.28	0	0.11	0	0	0	0.06	0	0.04	0	0	0	0	0.07	0
Vim	0	0	0	0	0	0	0	0	0	0	0	0	0	0	0	0	0
Ptprb	0	0	0	0	0	0	0	0	0	0	0	0	0	0	0	0	0
Cadm1	0.23	0.18	0.23	0.09	0.1	0	0.17	0.19	0.18	0	0	0	0	0	0	0.23	0.21
Nr4a3	0	0	0	0	0	0	0	0	0	0	0	0	0	0	0	0	0
Lrrc3b	0	0	0	0	0	0	0	0	0.18	0.3	0	0	0	0.29	0.1	0.36	0
Man1a2	0	0	0	0	0	0	0	0	0.17	0	0	0	0.01	0.12	0	0	0
Bmpr1b	0	0	0	0	0	0	0	0	0	0	0	0	0	0	0	0	0
Adarb1	0	0	0	0	0	0	0	0	0	0	0	0	0	0	0	0	0.09
Fgf5	0	0	0	0	0	0	0	0	0	0	0	0	0	0	0	0	0
Slc12a2	0	0	0	0	0	0	0	0	0	0	0	0	0	0	0	0	0
Smco4	0	0	0	0	0	0	0	0	0.28	0	0.07	0.03	0	0	0.38	0.06	0.3
Gria1	0.2	0.15	0.23	0	0	0.21	0.08	0.17	0.06	0	0	0.12	0.09	0.18	0	0	0
Lpcat2	0	0	0	0	0.04	0	0	0.11	0	0	0	0	0.14	0.38	0	0.19	0
Pdia5	0	0	0	0	0	0.19	0	0	0	0.33	0	0	0.52	0.38	0.04	0.09	0
Usp6nl	0	0	0	0	0	0	0.54	0.25	0.15	0	0	0	0	0	0	0.12	0
Tmem63c	0	0	0	0	0	0	0	0	0	0	0	0	0	0	0	0	0
Tmem191c	0	0	0	0	0.06	0	0	0.14	0.16	0.17	0	0	0.08	0.07	0.01	0	0
Efemp2	0	0	0	0	0	0	0	0	0	0	0	0	0	0	0	0	0
Arhgap40	0	0	0	0	0	0	0	0	0	0	0	0	0	0	0	0	0
Flna	0	0	0	0	0	0	0	0	0	0	0	0	0	0	0	0	0
Fam13c	0	0	0	0	0	0	0	0	0	0	0	0	0.19	0.08	0	0.04	0
Pdlim7	0.01	0	0	0	0	0.04	0	0	0.1	0.07	0	0	0	0	0	0	0
Nbea	0.19	0.02	0	0.19	0.17	0	0.18	0.02	0	0	0	0	0	0	0.15	0.19	0
Rab9b	0	0	0	0	0	0	0	0	0	0	0	0	0	0	0	0	0
Antxr2	0	0.16	0.95	0	0	0	0	0	0	0	0	0	0	0	0	0.69	0
Myo1b	0	0.29	0	0	0	0.93	0.88	0	0	0.59	0	0	0	0.16	0	0.1	0
Ndst4	0.96	0.67	0	0.06	0	0	0.37	0	0	0	0	0	0	0	0	0.58	0
Pam	0	0	0	0.16	0	0	0.17	0.21	0.33	0	0.19	0	0	0	0	0	0.21
Gprin3	0	0.21	0.48	0	0	0	0	0	0	0	0	0	0.03	0	0	0.15	0
Ano6	0	0	0.24	0.02	0	0	0.02	0	0	0	0	0	0.03	0	0.09	0.05	0
Eif2ak2	0	0	0	0	0	0	0	0	0	0	0	0	0	0	0	0	0
Ntf3	0	0	0	0	0	0	0	0	0	0	0	0	0	0	0	0	0
Eif4ebp1	0	0	0	0	0	0	0	0	0	0	0	0	0	0	0	0	0
Tmem26	0	0	0	0.34	0	0	0.59	0	0	0	0	0.28	0	0	0	0.52	0.58
Slc9a7	0	0	0	0	0.06	0	0	0	0	0	0	0	0	0	0	0.33	0
Rgs20	0	0	0	0	0	0	0	0	0.08	0	0	0.32	0	0	0.09	0.4	0
Mpped2	0	0	0	0.51	0	0	0	0	0	0	0	0.4	0.88	0.84	0	0.28	0
Igdcc4	0	0	0	0	0	0	0	0	0	0	0	0	0	0	0	0	0
Rab3gap1	0	0	0	0	0	0	0	0	0	0	0	0	0	0	0	0	0
Emcn	0	0	0	0	0	0	0	0	0	0	0	0	0	0	0	0	0
Asap3	0.01	0	0	0	0.68	0	0	0	0	0	0.36	0	0	0	0	0.3	0
Dlg5	0	0	0	0	0	0	0	0	0	0	0	0	0	0	0	0	0
Tfcp2	0	0	0	0	0	0	0	0	0	0	0	0	0	0	0	0	0
Cntn1	0	0.07	0	0.08	0	0.09	0	0.1	0	0	0	0	0	0	0.2	0.17	0
Prdm12	0	0	0	0	0.19	0	0	0	0	0	0	0.72	0.96	0.18	0	0	0
Kctd1	0.13	0	0	0	0	0	0	0.84	0.14	0	0	0	0	0.28	0	0.04	0
Arhgap25	0	0	0	0	0	0	0	0	0	0	0	0	0	0	0	0	0
Baz2b	0	0	0	0	0	0	0	0	0	0	0	0	0	0	0	0	0
Fgf1	0	0	0	0	0	0	0	0	0	0	0.41	0	0	0	0.02	0.77	0
Spry1	0	0	0	0	0	0	0	0	0	0	0	0	0	0	0	0	0
Scn8a	0	0	0	0	0	0.12	0	0	0	0	0	0	0	0	0.16	0	0
Shank2	0	0	0.14	0	0	0	0	0	0	0	0	0	0.05	0	0.09	0.18	0
Wipf1	0	0.41	0	0	0	0.76	0	0.33	0.57	0.32	0	0	0.13	0	0	0.01	0
Ldhd	0	0	0	0.66	0.01	0	0	0	0.11	0.29	0	0	0	0	0.38	0.16	0
Gpld1	0	0	0.33	0.01	0.38	0	0	0	0	0	0	0	0	0	0	0.35	0
1700025G04Rik	0	0	0	0	0	0	0	0	0	0	0.2	0.22	0.05	0.1	0.19	0.13	0
Adamtsl1	0	0.83	0.57	0	0	0	0	0	0	0	0.94	0	0	0	0	0.03	0
Map3k5	0	0	0	0	0	0.36	0.05	0.19	0	0.19	0	0	0	0	0	0	0
Fanca	0	0	0	0	0	0	0	0	0	0	0	0	0	0	0	0	0
Chsy3	0	0.18	0.4	0	0.02	0.2	0.82	0	0	0	0	0	0	0	0.34	0.46	0
Zc3h12c	0	0	0	0	0	0	0.08	0	0	0	0	0	0	0	0	0.21	0
Grin2b	0.22	0.21	0.12	0	0.08	0.18	0.1	0.19	0.22	0	0	0	0.13	0.14	0	0.05	0
Nfe2l2	0	0	0	0	0	0	0	0	0	0	0	0	0	0	0	0	0
Thnsl2	0	0	0	0	0	0	0	0	0	0	0	0	0	0	0	0	0
Chga	0	0	0	0	0	0	0.07	0	0.43	0	0	0	0	0	0	0	0.04
Fbxo15	0	0	0	0	0	0	0	0	0	0	0	0	0	0	0	0	0
Tub	0	0	0	0	0	0	0	0	0	0	0	0	0.07	0.12	0	0	0
Pde1b	0.4	0.05	0.19	0	0.5	0	0	0	0	0	0	0	0	0	0	0.13	0
St8sia4	0	0.41	0	0	0	0	0	0	0.08	0	0	0.01	0.21	0	0	0.23	0
Ptch1	0	0	0	0	0	0	0	0	0	0	0	0	0.48	0	0.04	0.09	0
Cd96	0	0	0	0	0	0	0	0	0	0	0	0	0	0	0	0	0
Trit1	0	0	0	0	0	0	0	0	0	0	0	0	0	0	0	0	0
Csmd3	0.21	0.22	0	0	0	0.23	0	0.22	0.22	0	0.17	0	0.13	0	0.19	0.15	0
Ppp1r14c	0	0	0	0	0	0	0	0	0	0	0.05	0.54	0.37	0	0	0	0
Cep170	0	0	0	0	0	0	0	0	0	0	0	0	0	0	0	0	0
Adamts13	0	0	0	0	0	0	0	0	0	0	0	0	0	0	0	0	0
P3h2	0	0	0	0	0	0	0.24	0.2	0.57	0.65	0.32	0	0	0	0.02	0	0
Crym	0.03	0	0	0	0	0	0	0.2	0	0.28	0	0	0.88	0.02	0	0	0
Timm22	0	0	0	0	0	0	0	0	0	0	0	0	0	0	0	0	0
Sdccag8	0	0	0	0	0	0	0	0	0	0	0	0	0	0	0	0	0
Pou2f2	0.02	0	0.3	0.54	0.5	0	0	0	0	0	0.4	0	0	0	0	0.04	0
Hs3st1	0.07	0	0.48	0	0.48	0	0	0.69	0	0.12	0	0	0	0.43	0	0	0
Brinp2	0.42	0	0	0.02	0.03	0.23	0	0	0	0	0	0	0.49	0.25	0	0	0
Prkag2	0.03	0.02	0	0	0	0.21	0	0	0	0	0	0	0	0	0	0	0
Nfxl1	0	0	0	0	0	0	0	0	0	0	0	0	0	0	0	0	0
Cldn3	0	0	0	0	0	0	0	0	0	0	0	0	0	0	0	0	0
Ssr3	0	0	0	0	0	0	0	0	0	0	0	0	0	0	0	0	0
Fbxl19	0	0	0	0	0	0	0	0	0	0	0	0	0	0	0	0	0
Slc24a2	0	0	0	0	0	0.16	0.25	0.32	0	0	0	0.18	0	0.2	0	0	0.03
B3gat2	0	0	0.75	0.87	0.36	0	0	0	0	0	0	0	0	0	0.15	0.13	0
Ccnd3	0	0	0	0	0	0	0	0	0	0	0	0	0	0	0	0	0
Vwa7	0	0	0	0	0	0	0	0	0	0	0	0	0	0	0	0	0
Vps54	0	0	0	0	0	0	0	0	0	0	0	0	0	0	0	0	0
Miip	0	0	0	0	0	0	0	0	0	0	0	0	0	0	0	0	0
Dock3	0	0	0	0	0	0.11	0.1	0.17	0.17	0.13	0.02	0	0	0	0.1	0.06	0
Ablim2	0	0	0	0	0	0.2	0	0.04	0.06	0.29	0	0	0	0	0.03	0	0
Vwf	0	0	0	0	0	0	0	0	0	0	0	0	0	0	0	0	0
Abhd3	0	0	0	0	0	0	0	0	0	0	0	0	0	0	0	0	0
F3	0	0	0	0	0	0	0	0	0	0	0	0	0	0	0	0	0
Pinx1	0	0	0	0	0	0	0	0	0	0	0	0	0.63	0	0	0	0
Unc13d	0	0	0	0	0	0	0	0	0	0	0	0	0	0	0	0	0
Gpr155	0	0.23	0	0	0	0.22	0	0	0.1	0	0	0	0	0.02	0	0	0
Fam122b	0	0	0	0	0	0	0	0	0	0	0	0	0	0	0	0	0
Pon2	0	0	0	0	0	0	0	0	0	0	0	0	0	0	0	0	0
Slc36a4	0	0	0	0	0	0	0	0	0	0	0	0	0	0	0	0	0
Npas2	0.66	0.51	0.47	0.1	0	0	0	0	0	0	0	0	0.15	0	0	0.1	0
Drd2	0	0.79	0.37	0.39	0	0	0	0.46	0	0	0	0	0	0.21	0.53	0	0
Ncoa2	0	0	0	0	0	0	0	0	0	0	0	0	0	0	0	0	0
Rab11fip4	0	0	0	0	0	0	0	0	0	0	0	0	0	0	0	0	0
Esrrg	0	0.07	0.13	0	0	0	0	0	0	0.01	0	0	0	0.08	0.23	0.15	0
Fgf10	0	0	0	0	0	0.8	0.66	0	0	0.25	0	0	0.94	0.57	0	0.03	0
Eif4a2	0	0	0	0	0	0	0	0	0	0	0	0	0	0	0	0	0
Cobl	0.26	0.05	0	0	0	0.09	0	0	0	0	0	0	0	0	0	0	0
Megf11	0	0	0	0	0	0.45	0	0.49	0.97	0.74	0.35	0	0	0	0.04	0	0
Rap1gds1	0	0.16	0	0	0	0.21	0	0	0	0.15	0	0	0.04	0.18	0.18	0	0
D1Ertd622e	0	0	0	0	0	0	0	0	0	0	0	0	0	0	0	0	0
Podn	0	0	0	0	0	0	0	0	0	0	0	0	0	0	0	0	0
Pou2f1	0	0.02	0	0	0	0	0	0	0	0	0	0.16	0.07	0	0	0.01	0
Prss38	0	0	0	0	0	0	0	0	0	0	0	0	0	0	0	0	0
Tsga13	0	0	0	0	0	0	0	0	0	0	0	0	0	0	0	0	0
Acyp2	0	0	0	0	0	0	0	0	0	0	0	0	0	0	0	0	0
Eya4	0	0	0	0	0	0	0	0.38	0	0	0	0.97	0	0	0	0.46	0
Trip4	0	0	0	0	0	0	0	0	0	0	0	0	0	0	0	0	0
Hsd17b4	0	0	0	0	0	0	0	0	0	0	0	0	0	0	0	0	0
Cpd	0	0	0	0	0	0	0	0	0	0	0	0	0	0	0	0	0
Stard13	0	0	0	0	0	0	0	0	0	0	0	0	0	0	0	0	0
Tnip3	0	0	0	0	0	0	0	0	0	0	0	0	0	0	0	0	0
Fgd3	0	0	0	0	0	0	0	0	0	0	0	0	0	0	0	0	0
Dzank1	0	0	0	0	0	0	0.04	0	0	0	0	0	0	0	0.05	0.17	0
Tenm3	0	0	0	0	0	0	0.02	0	0.3	0	0.39	0.07	0	0	0.1	0.18	0.39
Kif19a	0	0	0	0	0	0	0	0	0	0	0	0	0	0	0	0	0
Lrch1	0.07	0.03	0	0.11	0	0.12	0	0	0	0	0	0	0	0	0.12	0	0
Lrfn2	0.08	0	0	0.08	0.1	0.31	0.46	0	0	0	0	0	0	0	0	0	0
Ak8	0	0	0	0	0	0	0	0	0	0	0	0	0	0	0	0	0
Gja8	0	0	0	0	0	0	0	0	0	0	0	0	0	0	0	0	0
Xxylt1	0	0	0	0	0	0	0	0	0	0	0	0	0	0	0	0	0
Mctp2	0	0	0	0	0	0	0	0	0	0	0	0	0	0	0	0	0
Wfdc1	0	0	0	0	0	0	0	0	0	0	0	0	0	0	0	0	0
Gtf2f2	0.18	0.29	0.14	0	0.15	0	0	0	0.02	0	0	0	0	0	0	0.07	0
Pknox1	0	0	0	0	0	0	0	0	0	0	0	0	0	0	0	0	0
Best1	0	0	0	0	0	0	0	0	0	0	0	0	0	0	0	0	0
Ptbp3	0	0	0	0	0	0	0	0	0.24	0	0.1	0	0.14	0.34	0	0.13	0.02
Uba5	0	0	0	0	0	0	0	0	0	0	0	0	0	0	0	0	0
Gsto2	0	0	0	0	0	0	0	0	0	0	0	0	0	0	0	0	0
Vgll4	0	0	0	0	0	0	0	0	0	0	0	0	0	0	0	0	0
St6gal2	0.81	0.43	0	0	0.23	0	0	0.09	0	0	0	0	0	0	0	0.52	0
Nudc	0	0	0	0	0	0	0	0	0	0	0	0	0	0	0	0	0
Ablim1	0	0.13	0.08	0.09	0	0.07	0	0.02	0	0.03	0	0	0	0	0.21	0.04	0.15
Cpne4	0.02	0.51	0	0	0	0	0	0.51	0	0.06	0	0.65	0.22	0	0	0	0
Lrtm1	0	0	0	0	0	0.02	0.19	0.64	0.41	0	0	0	0	0	0	0.21	0.06
Tubb2b	0	0	0	0	0	0	0	0	0	0	0	0	0	0	0	0	0
Sec23ip	0	0	0	0	0	0	0	0	0	0	0	0	0	0	0	0	0
Tecpr1	0	0	0	0	0	0.08	0	0	0	0	0	0	0	0	0.02	0	0
Lmo4	0	0	0	0	0	0	0	0	0.04	0	0	0.18	0	0.08	0	0	0.85
Bend6	0.01	0	0	0.06	0.12	0	0	0.01	0	0	0.01	0	0	0	0.16	0.06	0
Slc7a3	0.31	0	0.03	0	0.4	0	0	0	0	0	0.63	0	0	0	0	0.26	0
Isoc1	0	0	0	0	0	0	0	0	0	0	0	0	0	0	0	0	0
Cd52	0	0	0	0	0	0	0	0.11	0.45	0.52	0	0	0	0.61	0	0	0
Fam114a1	0.4	0	0	0.83	0.84	0.36	0.39	0	0	0	0	0	0	0	0.3	0.18	0
Atp2b2	0	0	0	0	0	0	0	0	0	0	0	0	0	0	0	0	0
Vangl1	0	0	0	0	0	0	0	0	0	0	0	0	0	0	0	0	0
Fam49b	0	0	0	0.01	0	0	0	0	0	0	0	0	0.03	0.12	0.2	0.2	0
Spag16	0	0	0	0	0	0	0.53	0	0	0	0	0	0.08	0	0	0.88	0
Zhx2	0	0	0	0	0	0	0	0	0	0	0	0	0	0	0	0	0
Atf7ip	0	0	0	0	0	0	0	0	0	0	0	0	0	0	0	0	0
Flrt2	0.35	0.48	0.38	0.29	0	0.67	0.62	0	0	0	0	0	0	0	0	0	0
Spaca1	0	0	0	0	0	0	0	0	0	0	0	0	0	0	0	0	0
Smad1	0	0	0	0	0	0	0	0	0	0	0	0	0	0	0	0	0
Slc2a6	0	0	0	0	0	0	0	0	0	0	0	0	0	0	0	0	0
Ppp4r1	0	0	0	0	0	0	0.11	0	0	0.03	0	0	0	0	0	0.19	0
Chka	0	0	0	0	0	0	0	0.09	0	0	0	0	0	0.08	0	0	0
Rhpn2	0	0	0	0	0	0	0	0	0	0	0	0	0	0	0	0	0
Clmp	0.66	0.32	0.07	0	0.22	0	0.05	0	0	0	0	0	0.24	0	0	0	0
Glrb	0	0	0	0	0	0	0	0	0	0	0	0	0	0	0	0	0
Mbp	0	0	0	0	0	0	0	0	0.02	0	0	0	0	0.03	0	0.28	0
Cwh43	0	0	0	0	0	0	0	0	0	0	0	0	0	0	0	0	0
Sntg1	0	0	0	0	0	0	0	0.22	0.22	0.2	0.07	0.24	0.21	0	0.15	0.21	0.13
Frmpd3	0	0	0	0	0	0	0	0	0.19	0.19	0	0	0	0	0.15	0.22	0
Atp1a1	0.08	0	0	0	0	0	0	0.03	0	0	0	0	0	0	0	0	0.26
Ociad2	0	0	0	0	0	0	0	0	0.08	0	0.68	0	0	0	0	0.01	0.28
Zdbf2	0.01	0.06	0	0.16	0.36	0	0.33	0	0	0	0	0	0	0	0	0.19	0
Plekha5	0.1	0	0	0	0	0	0	0.13	0	0	0	0	0.15	0.2	0.04	0.2	0.09
Rabgap1	0	0	0	0	0	0	0	0	0	0	0	0	0	0	0	0	0
Prkca	0.2	0	0	0	0	0	0.37	0	0	0	0	0	0.06	0.07	0.16	0.19	0.26
Nr3c2	0	0	0	0	0.35	0	0	0	0	0.14	0	0	0.49	0.17	0	0.03	0
Bves	0	0.9	0.74	0	0	0	0	0	0	0	0	0	0	0	0.28	0.11	0
Tcf7l1	0.76	0	0.35	0	0	0.29	0	0	0	0	0	0	0	0	0	0.59	0
Plekhh2	0	0	0	0	0	0	0	0	0	0	0	0	0	0	0	0	0
Hs3st3b1	0.28	0	0.11	0	0	0.16	0.05	0.86	0.88	0.18	0	0	0	0	0	0	0
Smarcd1	0	0	0	0	0	0	0	0	0	0	0	0	0	0	0	0	0
Dscaml1	0	0.03	0	0	0	0	0	0	0	0	0.92	0.84	0.5	0.6	0.68	0.52	0.5
Eepd1	0.28	0	0.23	0	0	0	0	0.59	0	0	0	0.11	0	0	0.29	0.21	0
Mctp1	0	0	0	0.38	0	0	0.02	0	0	0	0	0	0.49	0.45	0	0	0
Exoc3l	0	0	0	0	0	0	0	0	0	0	0	0	0	0	0	0	0
Xrcc4	0	0	0	0	0	0	0	0	0	0	0	0	0.28	0	0	0	0
Arhgef11	0	0	0	0	0	0	0	0	0	0	0	0	0	0	0	0	0
Rasl11b	0	0	0	0	0	0	0	0	0	0	0	0	0	0	0	0	0
Kit	0.18	0	0	0	0	0	0	0	0	0	0.68	0.3	0.54	0	0	0.43	0
Akap9	0	0	0	0	0	0	0	0	0	0	0	0	0	0	0	0	0
Penk	0.2	0	0	0.07	0	0.4	0	0	0	0	0	0	0	0	0	0	0.83
Gad2	0	0	0	0	0	0	0	0	0	0	0.33	0.85	0.29	0.16	0	0.77	0
Dgkd	0	0	0	0	0	0	0	0	0	0	0	0	0	0.11	0	0.01	0
Nlgn1	0.15	0	0	0	0	0.25	0.24	0.25	0.23	0.16	0.19	0	0.21	0.23	0	0.09	0.2
Fabp5	0	0	0	0	0	0	0	0	0	0	0	0	0	0	0	0	0
Rsf1	0	0	0	0	0	0	0	0	0	0	0	0	0	0	0	0	0
Necab2	0	0	0	0	0	0	0	0.36	0.66	0.21	0	0	0	0	0	0.04	0
Pus7l	0	0	0	0	0	0	0	0	0	0	0	0	0	0	0	0	0
Sstr3	0	0	0	0	0	0	0.09	0	0.52	0.67	0	0	0	0	0	0.12	0.36
Pld3	0	0	0	0	0	0	0	0	0	0.1	0	0	0	0	0.13	0	0
Scap	0	0	0	0	0	0	0	0	0	0	0	0	0	0	0	0	0
Tuba1a	0	0	0	0	0	0	0	0	0	0	0	0	0	0	0	0	0
S100a6	0	0	0	0	0	0	0	0	0	0	0	0	0	0	0	0	0
Agl	0	0	0	0	0	0	0	0	0	0	0	0	0	0	0	0	0
Tshz1	0	0	0	0	0	0	0.63	0	0	0.31	0	0	0.11	0.39	0	0.12	0
Olfm2	0.15	0.17	0.27	0.05	0	0.06	0	0	0	0	0	0	0	0	0.18	0.02	0
Acvr1	0	0	0	0	0	0	0	0	0.04	0	0	0	0	0	0	0.16	0.04
Gstt1	0	0	0	0	0	0	0	0	0	0	0	0	0	0	0	0	0
Scn2a	0	0	0	0	0	0	0	0	0	0	0	0	0	0	0	0	0
Tyk2	0	0	0	0	0	0	0	0	0	0	0	0	0	0	0	0	0
Spast	0	0	0	0	0	0	0	0	0	0	0	0	0	0	0	0	0
Leprot	0	0	0	0	0	0	0	0	0	0	0	0	0	0	0	0	0
Fam92b	0	0	0	0	0	0	0	0	0	0	0	0	0	0	0	0	0
Fbxl7	0	0	0	0	0.07	0	0	0	0	0	0.67	0	0	0	0	0.45	0
Bmp2	0.83	0	0	0	0.37	0.08	0	0	0	0	0.52	0	0	0	0	0.09	0
Pcnx	0	0	0	0	0	0	0	0	0	0	0	0	0	0	0	0	0
Ascc3	0	0.09	0	0	0	0.05	0	0	0	0	0	0	0	0.03	0	0.14	0
Pitrm1	0	0	0	0	0	0	0	0	0	0	0	0	0	0	0	0	0
Ing2	0	0	0	0	0	0	0	0	0	0	0	0	0	0	0	0	0
Adamts18	0.81	0	0	0	0.33	0	0	0.18	0.23	0	0.07	0	0	0	0	0	0
Calcrl	0.89	0.13	0	0	0	0	0.48	0.27	0	0	0	0	0	0	0	0.35	0.2
Rnf152	0.71	0	0.41	0.74	0.64	0	0.46	0	0	0	0	0	0	0	0	0	0
Ppm1e	0	0	0	0	0	0.12	0	0.23	0.3	0.26	0	0	0.17	0.19	0	0.05	0
Fos	0	0	0	0	0	0	0	0	0	0	0	0	0	0	0	0	0
Slc22a17	0	0	0	0	0	0	0	0	0	0	0	0	0	0	0	0	0
Arhgap31	0	0	0	0	0	0	0	0.39	0.01	0	0	0.81	0.25	0	0	0.75	0
Slc1a2	0.36	0.14	0	0	0	0.17	0	0	0	0	0.05	0	0	0	0	0.3	0
Ptprz1	0	0	0	0.74	0.12	0	0.37	0	0	0	0	0	0.16	0.33	0	0.28	0
Cacna2d3	0	0	0	0	0	0.31	0.36	0.56	0.38	0	0	0	0	0	0	0.23	0.18
Rgma	0	0	0.17	0	0.09	0	0	0	0	0	0.74	0	0	0	0.59	0.14	0.53
Drd3	0	0.52	0.35	0.99	0	0	0	0	0	0	0	0	0	0	0	0.18	0
Mob3b	0	0	0	0	0	0	0	0	0	0	0	0.98	0	0	0	0	0
Lmtk2	0	0	0	0	0	0	0	0	0	0	0	0	0	0	0	0	0
Ripor2	0.13	0.06	0.06	0.07	0	0	0	0.55	0	0	0	0	0	0.22	0	0	0
Ranbp9	0	0.13	0	0	0	0	0	0	0	0	0	0	0.07	0.01	0	0	0
Tll2	0	0.11	0.44	0	0	0.98	0	0.18	0.54	0.87	0	0	0	0	0	0	0
Scyl2	0	0	0	0	0	0	0	0	0	0	0	0	0	0	0	0	0
Tpst2	0	0	0	0	0	0	0	0	0	0	0	0	0	0	0	0	0
Ccdc60	0.78	0.93	0.89	0	0	0	0	0	0	0	0	0	0	0	0	0.15	0
Fam78b	0	0.01	0	0.07	0	0.1	0	0	0	0	0	0	0	0	0	0.07	0
Ddx60	0	0	0	0	0	0	0	0	0	0	0	0	0	0	0	0	0
Rapgef5	0.08	0.24	0.08	0	0.05	0.23	0	0	0	0	0	0	0	0	0.12	0	0
Fxyd7	0	0	0	0	0	0	0	0	0	0	0	0	0	0	0	0	0
Myo16	0	0	0	0	0.25	0	0	0	0	0.42	0.14	0.44	0.54	0.53	0.25	0	0
Clip4	0	0	0	0	0	0	0	0	0	0	0	0	0	0	0	0	0
Cartpt	0	0	0	0	0	0	0	0	0	0	0	0	0	0	0	0	0
Ankmy1	0.21	0.37	0.25	0	0	0.05	0	0	0	0	0	0	0	0	0	0	0
Wwox	0.04	0.02	0	0	0	0.03	0	0.11	0	0.09	0.02	0.07	0	0	0.11	0	0
Id4	0.22	0.75	0.35	0.08	0	0	0	0	0	0.05	0	0	0	0	0	0.2	0
Large1	0	0	0	0	0	0.22	0	0.12	0.24	0.24	0	0	0	0.23	0.09	0	0
Trim58	0	0	0	0	0	0	0	0	0	0	0	0	0	0	0	0	0
Tln2	0	0	0	0	0	0	0	0.07	0	0.24	0	0	0	0	0	0	0
Cfap61	0	0	0	0	0	0	0.03	0.54	0.46	0.07	0	0	0	0	0	0	0.3
Sox21	0	0	0	0	0	0	0	0	0	0	0	0	0	0	0	0	0
Atp11a	0	0	0	0	0	0	0	0	0	0	0	0	0.04	0	0.01	0.14	0
Tlk1	0	0	0	0	0	0	0	0	0	0	0	0	0	0	0	0	0
Eml6	0.19	0.19	0.22	0	0.18	0	0	0.2	0	0	0	0	0	0	0	0.13	0
Msh3	0	0	0	0	0	0.3	0	0	0.35	0.21	0	0	0	0	0.17	0	0
Ccdc65	0.53	0	0	0	0	0	0	0.02	0.17	0	0	0	0	0	0	0.02	0
Brca1	0	0	0	0	0	0	0	0	0	0	0	0	0	0	0	0	0
Fggy	0	0	0	0	0	0	0	0	0	0	0	0	0	0	0	0.11	0
Bean1	0	0	0	0	0	0	0	0	0	0	0	0	0	0	0	0	0
Slc1a3	0	0	0	0	0	0	0	0	0	0	0	0	0	0	0	0	0
Tnfsf11	0	0	0	0	0	0	0	0	0	0	0	0	0	0	0	0	0
Top2a	0	0	0	0	0	0	0	0	0	0	0	0	0	0	0	0	0
Batf2	0	0	0	0	0	0	0	0	0	0	0	0	0	0	0	0	0
Cers6	0	0	0	0	0	0	0.11	0	0	0	0	0	0.2	0.44	0	0.38	0
Dgkz	0	0	0.02	0.37	0	0	0	0	0	0	0.48	0	0	0	0	0.13	0
Ephb6	0	0	0	0	0	0	0	0	0	0	0	0	0	0	0	0	0
Snap25	0	0.15	0	0	0	0	0.05	0.14	0.21	0.19	0.2	0.2	0.11	0	0	0	0.14
Papss2	0	0	0	0	0	0	0	0	0	0	0	0	0	0	0	0	0
Slc36a1	0	0	0	0	0	0	0	0	0	0	0	0	0	0	0	0	0
Pigx	0	0	0	0	0	0	0	0	0	0	0	0	0	0	0	0	0
Zfp827	0	0	0	0.07	0	0	0	0	0	0	0	0	0.21	0.54	0	0	0
Ubr3	0	0	0	0	0	0	0	0	0	0	0	0	0	0	0	0	0
Glg1	0	0	0	0.07	0	0	0	0.05	0	0	0.04	0	0	0	0	0.19	0
Rab37	0.29	0.41	0.66	0	0	0	0	0	0	0.1	0	0	0	0	0.76	0.59	0
Prss45	0	0	0	0	0	0	0	0	0	0	0	0	0	0	0	0	0
Hmox1	0	0	0	0	0	0	0	0	0	0	0	0	0	0	0	0	0
Srsf7	0	0	0	0	0	0	0	0	0	0	0	0	0	0	0	0	0
Tenm2	0	0	0	0	0	0.24	0.25	0.25	0.31	0.25	0.25	0	0	0	0.24	0.14	0.24
Cd276	0	0	0	0	0	0	0	0	0	0	0	0	0	0	0	0	0
Cdh4	0	0.15	0.17	0	0	0.2	0	0.18	0.36	0.22	0.42	0	0	0	0.23	0	0
4930402H24Rik	0	0	0	0	0	0	0	0	0	0	0	0	0	0	0	0	0
Npr3	0.3	0.01	0.35	0.93	0.35	0	0	0	0	0	0	0	0	0	0	0.42	0
Hmox2	0	0	0	0	0	0	0	0	0	0	0	0	0	0	0	0	0
Cdh2	0	0.12	0	0.36	0	0.05	0.34	0	0	0	0	0	0	0	0	0.2	0
Nhsl1	0	0	0.01	0	0	0	0.84	0	0	0	0	0	0	0.3	0	0.28	0
Sptb	0	0	0	0	0	0	0	0	0	0	0	0	0	0	0	0	0
a	0	0	0	0	0	0	0	0	0	0	0	0	0	0	0	0	0
Zfyve28	0	0	0	0	0.12	0	0	0	0	0.08	0	0	0	0	0	0	0
Cyp2c70	0	0	0	0	0	0	0	0	0	0	0	0	0	0	0	0	0
Pde3b	0	0	0	0	0	0	0	0	0	0	0	0	0	0	0	0	0
Sel1l3	0	0	0	0	0	0.53	0	0.82	0.23	0.84	0	0	0	0.63	0	0	0.11
Igsf21	0	0	0	0	0	0	0.29	0.05	0	0	0.63	0	0	0	0.01	0	0.43
Cdk5r1	0	0	0	0	0	0	0	0	0	0	0	0	0	0	0	0	0
Kctd16	0.35	0	0	0	0.56	0	0	0.37	0	0	0	0	0	0.28	0.54	0.44	0
Crb1	0	0.37	0	0	0	0	0	0.46	0.54	0	0	0.08	0	0	0	0.1	0
Dusp22	0	0	0	0	0	0	0	0	0	0	0	0	0	0	0	0	0
Pdgfc	0	0.75	0.22	0	0	0.27	0	0.83	0.35	0	0	0	0	0	0	0.03	0
Kcnj6	0.43	0.25	0.1	0	0.42	0	0	0	0	0	0	0	0	0	0	0	0
Gdap1l1	0	0	0	0	0	0	0	0	0	0	0	0	0	0	0	0	0
Alk	0.73	0.2	0.72	0.95	0.52	0	0.22	0	0	0	0	0	0	0	0	0.19	0
Ccbe1	0	0	0	0	0	0	0	0	0.68	0	0.96	0	0	0	0	0.1	0.86
Zfp467	0	0	0	0	0	0	0	0	0	0	0	0	0	0	0	0	0
Usp12	0	0	0	0	0	0	0	0	0	0	0	0	0	0	0	0	0
Pitpna	0	0	0	0	0	0	0	0	0	0	0	0	0	0	0	0	0
Spats2l	0	0	0	0.45	0	0.07	0.65	0	0	0	0	0	0	0.84	0	0.09	0.53
Mamld1	0	0.39	0.27	0	0.06	0	0	0	0	0	0	0	0.11	0.24	0	0.02	0
Prr29	0	0	0	0	0	0	0	0	0	0	0	0	0	0	0	0	0
Lrrc1	0	0	0	0	0	0	0	0	0	0	0	0	0.83	0.78	0	0.02	0
Rras2	0.25	0	0.37	0.01	0.11	0	0	0	0	0	0	0	0.04	0.44	0	0.13	0
Tmem233	0	0	0	0	0	0	0	0	0	0	0	0	0	0	0	0	0
Creb3l2	0	0	0	0	0	0	0	0	0	0	0	0	0	0	0	0	0
Rbp7	0	0	0	0	0	0	0	0	0	0	0	0	0	0	0	0	0
Borcs5	0	0	0	0	0	0	0	0	0	0	0	0	0	0	0	0	0
Gadl1	0	0	0	0	0	0	0	0	0	0	0	0	0	0	0	0	0
Fam83b	0	0	0	0	0	0.94	0	0	0.7	0.1	0.56	0.15	0	0	0	0	0
Ano3	0	0	0	0	0	0.84	0.07	0.51	0.42	0.52	0	0	0	0.11	0	0.19	0.14
Gabrg2	0	0	0	0	0.16	0	0.07	0	0	0.04	0.02	0	0	0	0.21	0	0
Hmbox1	0	0	0	0	0	0	0	0	0	0	0	0	0	0	0	0	0
Pdgfrl	0	0	0	0	0	0	0	0	0	0	0	0	0	0	0	0	0
Trim13	0	0	0	0	0	0	0	0	0	0	0	0	0	0	0	0	0
Kcnc2	0.17	0	0	0.63	0.2	0	0.12	0	0	0	0	0.23	0	0.34	0	0.2	0
Mylip	0.09	0.11	0.06	0.73	0.66	0	0.21	0	0	0	0	0	0	0	0	0.06	0
Plxnd1	0	0	0	0	0	0	0	0	0	0	0	0	0	0	0	0	0
Sytl2	0.51	0.33	0	0.33	0.77	0	0	0	0	0	0.18	0	0	0	0.16	0.18	0
Sik3	0	0	0	0.08	0	0	0	0.17	0.01	0	0.03	0	0	0	0.05	0.21	0
Rab31	0	0	0.22	0	0	0.05	0.56	0	0.1	0.4	0	0	0	0	0	0.3	0.21
Wnt7b	0	0	0	0	0	0	0	0	0	0	0	0	0	0	0	0	0
Sh2d5	0	0	0	0	0	0	0	0	0	0	0	0	0	0	0	0	0
Sphkap	0	0.9	0.38	0.23	0	0	0	0	0	0	0.52	0.61	0	0	0	0.4	0
Qpct	0	0	0	0	0.07	0	0	0	0	0	0.16	0.07	0	0	0.2	0.11	0
Tm6sf1	0.02	0	0	0	0	0	0	0.55	0	0	0	0	0	0	0	0.63	0
Cdh8	0	0	0	0.1	0.2	0	0	0.18	0	0.55	0	0	0.75	0	0.37	0.28	0
Vegfb	0	0	0	0	0	0	0	0	0	0	0	0	0	0	0	0	0
Acvr1c	0	0	0	0	0	0	0	0	0.98	0.46	0	0	0	0	0.81	0.25	0
Cytl1	0	0	0	0	0	0	0	0	0	0	0	0	0	0	0	0	0
F11r	0	0	0	0	0	0	0	0	0	0	0	0	0	0	0	0	0
Cldn11	0	0	0	0	0	0	0	0	0	0	0	0	0	0	0	0	0
Sema3c	0.88	0.48	0	0	0	0.41	0.02	0	0	0	0	0	0	0.15	0	0.34	0
Lhfpl1	0	0	0	0	0	0	0	0	0	0	0	0	0	0	0	0	0
Megf10	0	0	0	0	0	0	0	0	0	0	0	0	0	0	0	0	0
Cdh9	0	0.49	0.05	0.62	0.54	0	0.1	0	0	0	0	0.23	0	0	0.13	0	0
Kat2b	0	0	0	0	0	0	0	0	0	0	0	0	0	0	0	0	0
Osbpl3	0	0.1	0.44	0	0	0.37	0.28	0.08	0	0	0	0	0	0	0	0.48	0.34
Slc25a29	0	0	0	0	0	0	0	0	0	0	0	0	0	0	0	0	0
Lars2	0	0	0	0	0	0	0	0	0	0	0	0	0	0	0	0	0
Qprt	0	0	0	0	0	0	0	0	0	0	0	0	0	0	0	0	0
Kalrn	0	0.13	0.09	0.21	0.17	0.09	0	0.09	0.03	0	0	0	0.05	0.15	0.07	0	0
Vrk2	0	0	0	0	0	0	0	0	0	0	0	0	0	0	0	0	0
Ppp4r4	0	0	0	0	0	0	0.35	0	0.09	0	0	0	0	0	0	0.1	0
Psma1	0	0	0	0	0	0	0	0	0	0	0	0	0	0	0	0	0
Lrriq1	0.18	0	0	0	0.1	0	0.06	0	0.32	0.12	0	0	0	0	0	0.04	0
Bmp7	0	0	0	0	0	0	0	0	0	0	0	0	0	0	0	0	0
Wipi1	0	0	0	0	0	0	0	0	0	0	0	0	0	0	0	0	0
Trpm4	0	0	0	0	0	0	0	0	0	0	0	0	0	0	0	0	0
Slc9a6	0	0	0	0	0	0	0	0	0	0	0	0	0	0	0	0	0
Tgfbr3	0	0	0	0	0	0	0	0.61	0.72	0.54	0.09	0.18	0	0	0	0	0
Scn5a	0.05	0.57	0.22	0	0	0	0	0.2	0	0.71	0	0	0	0	0.71	0	0
Spata6	0.13	0.24	0	0	0	0	0	0	0	0.86	0	0.04	0	0	0.74	0.53	0
Snx31	0	0	0	0	0	0.58	0	0	0	0.34	0	0	0	0.93	0.11	0.13	0
Tspan18	0.79	0.39	0.03	0.81	0	0	0	0	0	0	0	0	0.46	0	0	0.2	0
Scrn1	0	0	0	0	0	0	0	0	0	0	0	0	0	0	0	0	0
Caln1	0.05	0.12	0.09	0	0	0.02	0	0	0	0	0	0	0.46	0.31	0.04	0.02	0.16
Jmjd1c	0	0	0	0	0	0	0	0	0	0	0	0	0	0	0	0	0
Ksr2	0	0	0	0	0	0	0	0	0	0	0	0	0	0	0	0	0
Ank2	0	0.12	0	0.05	0	0.24	0.09	0.24	0.25	0.22	0	0	0.16	0.19	0.23	0.21	0
Mov10	0	0	0	0	0	0	0	0	0	0	0	0	0	0	0	0	0
Jph4	0	0	0	0	0	0	0	0	0	0	0	0	0	0	0	0	0
Nrm	0	0	0	0	0	0	0	0	0	0	0	0	0	0	0	0	0
Pdss2	0	0	0	0	0.04	0	0	0	0	0	0	0	0	0	0	0.16	0
Prss55	0	0	0	0	0	0	0	0	0	0	0	0	0	0	0	0	0
Reck	0	0	0	0	0	0	0	0.62	0.57	0.05	0	0	0.05	0	0	0.4	0
Rarb	0.56	0	0	0	0	0	0	0	0	0	0	0	0.04	0.86	0	0.35	0
Hecw2	0.17	0	0.24	0	0	0.18	0	0.12	0	0	0.19	0	0	0	0	0	0
Begain	0	0	0	0	0	0	0	0	0.14	0	0	0	0	0	0	0.05	0
Nrsn1	0.18	0.07	0.29	0.1	0.34	0	0	0	0	0	0	0	0	0	0	0.24	0
Uhrf2	0	0.03	0	0.19	0.05	0	0	0	0	0	0	0	0	0	0	0.14	0
Ring1	0	0	0	0	0	0	0	0	0	0	0	0	0	0	0	0	0
Agk	0	0	0	0	0	0	0	0	0	0	0	0	0	0	0	0	0
Mindy4b-ps	0.25	0	0	0	0	0.34	0	0.19	0.6	0.24	0	0	0	0	0	0.29	0
Tnnt1	0	0	0	0	0	0	0	0	0	0	0	0	0	0	0	0	0
Fam172a	0	0	0	0	0	0.1	0	0	0	0	0	0	0	0.08	0	0.09	0
Atp11b	0	0	0	0	0	0	0	0	0	0	0	0	0	0	0	0	0
Arhgef26	0.4	0.05	0	0	0	0.97	0	0.31	0	0	0	0	0.58	0.19	0	0	0
Dlc1	0	0	0	0	0.09	0	0	0.18	0	0	0	0	0.16	0	0	0	0
Dlgap2	0.17	0	0	0	0.18	0	0.01	0.21	0.23	0	0	0	0	0	0	0	0
Btbd16	0.87	0.02	0	0	0.21	0	0	0.69	0	0	0	0	0	0	0	0.14	0
Tbc1d25	0	0	0	0	0	0	0	0	0	0	0	0	0	0	0	0	0
Tspan15	0	0	0	0	0	0	0	0	0	0	0	0	0	0	0	0	0
Optn	0	0	0	0	0	0	0	0.73	0.24	0.35	0	0.01	0	0.05	0	0	0
Tsc22d1	0.11	0	0.12	0	0	0	0	0	0	0	0	0	0	0.04	0	0.08	0
Prrt2	0	0	0	0	0	0	0	0	0	0	0	0	0	0	0	0	0
Rps6ka3	0	0.77	0.14	0.46	0	0	0	0.23	0	0	0	0	0	0	0	0	0
Sgk3	0	0.41	0	0	0	0.29	0	0	0	0.01	0	0	0.84	0.6	0	0	0
Lamp5	0.09	0.39	0.91	0	0	0.03	0	0	0	0	0	0	0	0.92	0	0.15	0
Calhm3	0	0	0	0	0	0	0	0	0	0	0	0	0	0	0	0	0
Tmem120b	0	0	0	0	0	0	0	0	0	0	0	0	0	0	0	0	0
Ror2	0.06	0	0.74	0	0	0	0	0.11	0	0	0	0	0.84	0.56	0	0	0
Slc4a4	0	0	0	0	0	0	0	0.46	0.24	0	0	0	0	0.43	0	0.51	0
Dab1	0.24	0.23	0.23	0.05	0.16	0.08	0	0	0.13	0.18	0	0.23	0.19	0	0.07	0	0
Rimbp2	0	0	0	0	0	0	0	0	0	0.1	0	0	0	0.12	0	0	0
Mindy4	0	0	0	0	0	0	0	0	0	0	0	0	0	0	0	0	0
Tacr3	0	0	0	0	0	0	0	0	0	0	0	0	0	0	0	0	0
Mtg2	0	0	0	0	0	0	0	0	0	0	0	0	0	0	0	0	0
Prtg	0	0	0	0	0	0	0.26	0.01	0.53	0	0.05	0	0	0	0	0.45	0
Kcnd3	0	0	0	0	0	0	0	0	0.5	0.32	0	0	0	0	0.01	0.21	0.26
Grp	0	0	0	0	0	0	0	0	0	0	0	0	0	0	0	0	0
P4ha2	0	0	0	0	0	0	0	0	0	0	0	0	0	0	0	0	0
Cop1	0	0	0	0	0	0	0	0	0	0	0	0	0	0	0	0	0
Sgms1	0	0	0	0	0	0	0	0	0	0	0.08	0.13	0	0.11	0	0.28	0
Sostdc1	0	0	0	0	0	0	0	0	0	0	0	0	0	0	0	0	0
Csmd1	0.2	0.23	0	0.19	0	0.24	0	0.15	0.23	0	0.13	0.2	0.14	0.09	0	0.05	0
Zfp609	0	0	0	0.16	0	0	0	0	0	0	0	0	0	0.04	0	0.17	0
Ptprn2	0	0	0	0	0.1	0	0	0.13	0.04	0.16	0.2	0.05	0.12	0	0.09	0.11	0
Ahcyl2	0	0	0	0	0	0	0	0	0	0	0	0	0	0	0	0	0
Pparg	0	0	0	0	0	0	0	0	0	0	0	0.93	0.34	0.33	0	0.18	0
Cyb5a	0	0	0	0	0	0	0	0	0	0	0	0	0	0	0	0	0
Tspyl2	0	0	0	0	0	0	0	0	0	0	0	0	0	0	0	0	0
Pde7b	0	0.48	0	0	0	0	0	0	0	0.53	0	0.43	0.3	0.55	0.52	0	0
Snrnp70	0	0	0	0	0	0	0	0	0	0	0	0	0	0	0	0	0
Hps5	0	0	0	0	0	0	0	0	0	0	0	0	0	0	0	0	0
Ptprj	0	0.05	0	0	0	0	0	0	0	0	0	0	0.03	0.13	0.17	0.12	0
Adgrd1	0	0	0	0	0	0	0	0	0	0	0	0	0	0	0	0	0
Exoc6b	0	0	0	0	0	0	0	0	0	0	0	0	0	0	0	0	0
Ccdc3	0	0	0	0	0	0	0	0	0	0	0	0	0	0	0	0	0
Tbx3	0	0.13	0	0	0	0	0	0	0	0	0	0	0.47	0.96	0	0.88	0
1700113H08Rik	0	0	0	0	0	0	0	0	0	0	0	0	0	0	0	0	0
Tle4	0	0	0	0.85	0	0	0	0	0	0	0	0	0.32	0	0.04	0.26	0
Mroh8	0	0	0	0	0	0	0	0	0	0	0	0	0	0	0	0	0
Osbpl8	0	0.05	0.46	0	0	0	0	0	0	0	0	0	0.35	0	0	0.18	0
Myo15	0	0	0	0	0	0	0	0	0	0	0	0	0	0	0	0	0
Mast2	0	0	0	0	0	0	0	0	0	0	0.28	0.19	0.14	0	0	0.25	0
Atrnl1	0	0	0	0	0	0	0.09	0.18	0.1	0.23	0	0.14	0	0	0.33	0	0.26
Ern1	0	0	0	0	0	0	0	0	0	0	0	0	0	0	0	0	0
Sec14l1	0	0	0	0	0	0	0	0	0	0	0	0	0	0	0	0	0
Lrrk1	0	0	0	0	0	0	0	0	0	0	0	0	0	0	0	0	0
Tia1	0	0	0	0	0	0	0	0	0	0	0	0	0	0	0	0	0
Prex1	0.15	0	0	0	0	0	0	0.37	0	0	0.36	0	0	0	0	0.43	0
Eml1	0.08	0.05	0	0	0.2	0	0	0	0	0	0	0	0	0	0.1	0	0
Zmiz1	0	0.09	0.27	0.02	0	0	0	0	0	0	0.24	0	0	0	0	0	0
Pctp	0	0	0	0	0	0	0	0	0	0	0	0	0	0	0	0	0
Macf1	0.1	0	0	0.16	0	0.14	0.09	0.22	0.19	0.03	0	0	0	0	0.06	0.22	0
Gpt2	0	0	0	0	0	0	0	0	0	0	0	0	0	0	0	0	0
Lgmn	0	0	0	0	0	0	0	0	0	0	0.42	0.16	0	0	0	0.06	0
Cplx1	0	0	0	0	0	0	0	0	0	0	0	0	0	0	0	0	0
Cntnap2	0	0	0	0	0	0	0	0.25	0.23	0.25	0	0.18	0.09	0	0.23	0.25	0
Mroh1	0	0	0	0	0	0	0	0	0	0	0.05	0	0	0	0	0.22	0
Sorcs2	0	0	0	0	0	0.13	0	0	0.04	0.29	0.64	0	0.69	0.17	0	0.17	0
Cntn4	0	0	0	0	0	0.55	0.55	0.25	0.36	0.06	0	0	0	0.2	0.24	0.21	0.59
Nr5a2	0	0	0	0	0	0	0	0	0	0	0	0	0	0	1	0.51	0
Cacna1f	0	0	0	0	0	0	0	0	0	0	0	0	0	0	0	0	0
Nmbr	0	0	0.16	0.25	0	0	0.74	0	0	0	0	0	0	0	0	0	0.9
Amph	0.07	0	0	0.15	0.21	0	0.05	0.05	0	0	0	0	0	0	0	0.08	0
Coro6	0.43	0.44	0.01	0.81	0.08	0	0	0	0	0	0	0	0	0.52	0.59	0.17	0
Xkr4	0.18	0.23	0.22	0	0.21	0	0	0.21	0.14	0	0	0	0	0	0.08	0.16	0
Exog	0	0	0	0	0	0	0	0	0	0	0	0	0	0	0	0	0
Arhgap10	0.4	0	0	0	0	0	0	0.15	0.4	0.31	0	0	0.5	0	0.2	0	0
Hpgd	0	0	0	0	0	0	0	0.54	0.01	0.76	0	0	0.93	0.12	0.24	0.17	0
Mnat1	0	0	0	0	0	0	0	0	0	0	0	0	0	0	0	0	0
Trp63	0	0	0	0	0	0	0	0	0	0	0	0	0	0	0	0	0
Ust	0.19	0	0	0	0	0	0	0	0	0	0	0.83	0.85	0.92	0	0	0
F10	0	0	0	0	0	0	0	0	0	0	0	0	0	0	0	0	0
Zfand3	0	0	0	0	0	0	0	0	0	0	0	0	0	0	0	0	0
Kcnh5	0	0.11	0.2	0	0.27	0.59	0.3	0	0	0.06	0	0	0	0.09	0	0	0
Lepr	0	0	0	0	0	0.16	0	0.85	0.88	0.45	0	0	0	0	0	0.52	0
Eva1c	0.8	0.16	0	0	0.92	0	0	0	0	0	0	0	0	0	0	0.66	0
Trpc7	0	0.09	0.39	0	0	0	0	0	0	0	0.88	0	0	0.58	0.31	0.13	0.11
Rassf2	0	0	0	0	0	0	0	0	0	0	0	0	0	0	0	0	0
Mras	0	0	0	0	0.16	0	0.18	0	0	0.38	0	0	0	0	0	0.13	0
Invs	0	0	0	0	0	0	0	0	0	0	0	0	0	0	0	0	0
Magi1	0.16	0.11	0.11	0	0	0.21	0	0.23	0.18	0.07	0	0.01	0	0.12	0	0	0
Gabbr1	0	0	0	0	0	0	0	0	0	0	0	0	0	0	0	0	0
Kcnk12	0	0	0	0	0	0	0	0	0	0	0	0.81	0.06	0.48	0	0.26	0
Pla2r1	0	0	0	0	0	0	0	0	0	0	0	0	0	0	0	0	0
Oas3	0	0	0	0	0	0	0	0	0	0	0	0	0	0	0	0	0
Nr3c1	0	0	0	0	0.09	0	0	0	0	0	0	0.5	0	0	0	0.01	0
Reep3	0	0	0	0	0	0.02	0	0	0.08	0	0	0	0	0	0	0.29	0
Chfr	0	0.1	0	0.1	0	0	0	0	0	0	0	0	0.02	0	0	0.11	0
Slc6a5	0	0	0	0	0	0	0	0	0	0	0	0	0	0	0	0	0
Deptor	0	0	0	0	0	0.08	0.28	0	0.56	0.54	0.01	0	0	0	0.15	0	0.26
Magi2	0	0.15	0.1	0	0	0.25	0.2	0.14	0.17	0	0	0	0.24	0.18	0.23	0.24	0
Sult1c1	0	0	0	0	0	0	0	0	0	0	0	0	0	0	0	0	0
Wnk2	0	0	0	0	0	0	0	0	0	0	0	0	0	0	0	0	0
Usp3	0	0	0	0	0	0	0	0	0.37	0.08	0	0	0	0	0	0.27	0
Cap2	0	0	0	0	0	0.04	0.58	0	0	0	0	0	0.17	0.29	0	0	0.2
Traip	0	0	0	0	0	0	0	0.42	0.61	0.55	0	0	0	0.29	0	0	0
Unc80	0	0.02	0	0.01	0	0.04	0.09	0	0	0	0.03	0	0.12	0.01	0.03	0.04	0
Gng4	0.04	0.31	0.01	0	0.28	0	0	0	0	0	0	0	0.18	0	0	0.16	0
Lrrc4b	0	0	0	0	0	0	0	0	0	0	0	0	0	0	0	0	0
Cdh7	0	0	0	0.44	0	0	0	0	0	0	0	0.67	0.9	0.86	0	0	0
Tnrc6a	0	0	0	0	0	0	0	0	0	0	0	0	0	0	0	0	0
Fnip2	0	0	0	0	0	0	0	0	0	0	0	0	0	0	0	0	0
Cpvl	0	0	0	0	0	0	0	0	0	0	0	0	0	0	0	0	0
Dnah3	0	0	0	0	0	0	0	0	0	0	0	0	0	0	0	0	0
Camk2g	0	0.13	0	0.14	0.03	0	0	0	0	0	0	0	0	0	0.07	0.09	0
Dnah10	0.14	0.13	0.34	0	0.6	0	0.27	0	0	0.25	0	0	0	0	0	0.17	0
Pdia2	0	0	0	0	0	0	0	0	0	0	0	0	0	0	0	0	0
Fgf12	0	0	0	0	0	0	0.01	0.06	0	0	0	0.1	0.12	0.16	0.03	0	0
Mapre1	0	0	0	0	0	0	0	0	0	0	0	0	0	0	0	0	0
Fmn1	0.6	0.18	0.85	0	0	0.25	0	0.1	0	0	0	0	0	0	0	0.33	0
Tspyl1	0	0	0	0	0	0	0	0	0	0	0	0	0	0	0	0	0
Ankrd27	0	0	0	0	0	0	0	0	0	0	0	0	0	0	0	0	0
Lrrfip1	0	0	0	0	0	0	0	0.07	0.13	0.15	0	0	0	0	0.04	0	0.01
Gck	0	0	0	0	0	0	0.22	0.1	0.54	0.67	0	0	0	0	0	0.13	0
Sash1	0.28	0.13	0	0.37	0.16	0.02	0	0	0	0	0	0	0	0.7	0.27	0.46	0
Rnd2	0	0	0	0	0	0	0	0	0	0	0	0	0	0	0	0	0
Crebrf	0	0	0	0	0	0	0	0	0	0	0	0	0	0	0	0	0
Sik2	0	0	0	0	0	0	0	0	0	0	0.13	0	0.02	0	0	0.03	0
Wtip	0.04	0.1	0.28	0	0.2	0	0	0	0	0	0	0	0	0.4	0	0.05	0
Ccdc6	0	0	0	0	0	0.14	0	0	0	0	0	0	0	0	0	0	0
Zfp282	0	0	0	0	0	0	0	0	0	0	0	0	0	0	0	0	0
Slc22a3	0.18	0	0.01	0	0.17	0	0	0.98	0	0	0	0	0.24	0.6	0	0.1	0
Fabp3	0	0	0	0	0	0	0	0	0	0	0	0	0	0	0	0	0
Igf1r	0	0.19	0.03	0	0	0	0	0	0	0	0	0.16	0	0.26	0	0.29	0
Maoa	0	0	0	0	0	0	0	0	0	0	0	0	0	0	0	0	0
Uchl1	0	0	0	0	0	0	0	0	0	0	0	0	0	0	0	0	0
Lrrtm4	0	0.18	0.17	0.17	0.2	0	0	0	0	0.1	0	0.3	0.44	0.06	0.26	0.22	0.23
Kcnn2	0	0.12	0.13	0.07	0	0	0.27	0	0	0	0	0	0	0	0.2	0.26	0.15
Micall2	0	0	0	0	0	0	0	0	0	0	0	0	0	0	0	0	0
Dach2	0	0	0	0	0	0.47	0	0	0	0	0	0.88	0.61	0	0	0.44	0
Phactr2	0.48	0.83	0.52	0.49	0	0	0.06	0.05	0	0	0	0	0	0	0	0.32	0
Ddah2	0	0	0	0	0	0	0	0	0	0	0	0	0	0	0	0	0
Klk7	0	0	0	0	0	0	0	0	0	0	0	0	0	0	0	0	0
Ankdd1a	0	0	0	0	0	0	0	0	0	0	0	0	0	0	0	0	0
Ubl3	0	0	0	0.34	0.32	0	0	0	0	0	0	0	0	0	0	0	0
Tfdp2	0	0	0	0	0	0	0	0	0	0	0	0	0	0	0	0	0
Prkacb	0	0	0	0	0	0	0.04	0	0	0	0	0.07	0	0.12	0	0.04	0.02
Arhgap36	0	0	0	0.93	0	0	0.03	0	0.13	0.27	0	0	0	0	0.71	0.15	0
Snca	0	0.2	0.21	0.23	0	0.06	0.61	0	0	0	0	0	0	0	0	0.17	0
Prdm10	0	0	0	0	0	0	0	0	0	0	0	0	0	0	0	0	0
Crmp1	0	0	0	0	0	0	0	0	0	0	0	0	0	0	0	0	0
Slc17a8	0	0	0	0	0	0	0	0	0	0	0.98	0.94	0	0	0	0	0
Gpr156	0	0	0	0	0	0	0	0	0	0	0	0	0	0	0	0	0
Adam9	0	0	0	0	0	0	0	0	0	0	0	0	0	0	0	0	0
Fam227a	0.16	0	0	0	0	0	0	0	0	0	0	0	0	0	0	0.02	0
Slco5a1	0	0	0	0.09	0.9	0	0.21	0	0	0	0	0	0	0	0	0.3	0
Spag17	0	0	0	0	0	0	0	0	0	0	0	0	0	0	0	0	0
Rhbdl2	0	0	0	0	0	0	0	0	0	0	0	0	0	0	0	0	0
Evl	0	0.07	0.19	0.17	0.06	0	0	0	0	0	0	0	0	0.04	0	0.04	0
Abcb7	0	0	0	0	0	0	0	0	0	0	0	0	0	0	0	0	0
Dusp6	0	0	0	0	0	0	0	0	0	0	0	0	0	0	0	0	0
F2r	0	0	0	0	0	0	0	0	0	0	0	0	0	0	0	0	0
Nefl	0	0	0	0	0	0	0	0	0	0	0	0	0	0	0	0	0.13
Dennd5b	0.01	0.02	0	0.11	0.05	0	0	0	0	0	0	0	0	0	0.07	0.21	0
Ctnna3	0	0	0	0.03	0.21	0	0.05	0	0	0.15	0	0.31	0.08	0	0.22	0.15	0
Agxt2	0	0	0	0	0	0	0	0	0	0	0	0	0	0	0	0	0
Rxrg	0	0.37	0	0	0	0.46	0	0.8	0	0	0	0	0	0.81	0	0	0
Echdc2	0	0	0	0	0	0	0	0	0	0	0	0	0.99	0.48	0.37	0.15	0
Bcam	0	0	0	0	0	0	0	0	0	0	0	0	0	0	0	0	0
Ivd	0	0	0	0	0.27	0	0	0	0	0	0.11	0	0	0	0	0.09	0
Mcc	0.25	0.82	0.88	0.04	0	0	0	0	0	0	0	0	0	0	0	0.37	0
Pygb	0	0	0	0.02	0	0	0	0	0	0	0	0	0	0	0.03	0	0
Lmo3	0	0	0	0	0	0.43	0.53	0.02	0	0.53	0	0	0	0.93	0	0	0.59
Coq10a	0.02	0.12	0	0	0	0	0	0	0	0	0	0.03	0	0	0	0.15	0
Pstpip2	0	0	0	0	0	0	0	0	0	0	0	0	0	0	0	0	0
Trpc6	0.42	0.2	0.58	0	0.01	0	0	0	0	0	0	0	0.56	0.33	0	0.27	0
Mcmdc2	0	0	0	0	0	0	0	0	0	0	0	0	0	0	0	0	0
Atxn7l1	0.11	0.13	0.14	0	0	0.02	0	0.09	0	0	0	0	0.05	0.02	0	0	0
Mapkapk2	0	0	0	0	0	0	0	0	0	0	0	0	0	0	0	0	0
Klhl23	0	0	0	0	0	0	0	0	0	0	0	0	0	0	0	0	0
Cdc42ep3	0	0	0	0	0	0	0	0.47	0	0	0	0	0	0	0	0	0
Mei4	0	0.04	0	0.57	0	0	0	0	0	0	0.04	0	0	0	0.44	0.03	0
Clasp1	0.1	0.18	0	0.13	0	0	0	0	0	0	0	0	0.03	0	0	0.19	0
Asl	0	0	0	0	0	0	0	0	0	0	0	0	0	0	0	0	0
AI593442	0	0.45	0.64	0.29	0.33	0	0	0	0	0	0	0	0	0	0	0.26	0
4921539E11Rik	0	0	0	0	0	0	0	0	0	0	0	0	0	0	0	0	0
Asns	0	0	0	0	0	0	0	0	0	0	0	0	0	0	0	0	0
Nt5c2	0	0	0	0	0	0	0	0	0	0	0	0	0	0	0	0	0
Galntl6	0	0.65	0.33	0.21	0.13	0.27	0.1	0	0	0	0	0	0.17	0.12	0.19	0.24	0
Rasal2	0.13	0	0.11	0.37	0	0	0	0	0	0	0	0	0	0.13	0	0.2	0
Dhx58	0	0	0	0	0	0	0	0	0	0	0	0	0	0	0	0	0
Cdkl1	0	0	0.18	0.23	0.14	0	0	0.03	0	0	0	0	0	0	0	0	0
Myo19	0	0	0	0	0	0	0	0	0	0	0	0	0	0	0	0	0
Slc26a11	0	0	0	0	0	0	0	0	0	0	0	0	0	0	0	0	0
Srgap1	0	0	0	0.66	0.49	0	0	0	0	0.11	0	0	0.25	0	0	0.56	0
Cacna1i	0	0.18	0.14	0	0	0.25	0.04	0	0	0	0	0	0	0	0	0.03	0
Zdhhc14	0	0.28	0	0	0	0	0	0	0	0	0	0	0.78	0.55	0	0.21	0
Snx27	0	0	0	0	0	0	0	0	0	0	0	0	0	0	0	0	0
Ell	0	0	0	0	0	0	0	0	0	0	0	0	0	0	0	0	0
Pkhd1l1	0	0	0	0	0	0	0	0	0	0	0	0	0	0	0	0	0
Slc16a10	0	0	0	0	0	0	0.24	0.46	0	0	0	0	0	0	0.24	0.48	0
Arrb1	0	0	0	0	0	0	0	0	0	0	0	0	0	0	0	0	0
Lipg	0.23	0	0	0	0	0	0	0.87	0.25	0	0	0	0	0	0	0.43	0
Peg3	0	0	0	0	0	0	0	0	0	0	0	0	0	0	0	0	0
Kcnt1	0	0	0	0	0	0	0	0	0	0	0	0.11	0.16	0	0	0	0
Pkd1l2	0	0	0	0	0	0	0	0	0	0	0	0	0	0	0	0	0
Syt2	0.45	0	0	0	0	0.83	0.22	0	0.22	0	0	0	0	0	0.81	0	0
Stxbp6	0.76	0	0	0	0.43	0	0	0.75	0.86	0	0	0	0	0	0	0.14	0
Ak5	0.18	0	0	0	0.12	0.05	0	0	0	0.06	0	0.01	0	0	0	0	0.14
Kcnt2	0	0.54	0	0.32	0	0	0	0	0	0	0	0.39	0	0	0.42	0.68	0
Ssbp2	0.2	0.2	0	0.08	0.02	0.01	0	0	0	0	0	0	0.17	0.24	0	0.13	0
Fbxo34	0	0	0	0	0	0	0	0	0	0	0	0	0	0	0	0	0
Sdk2	0.1	0	0	0.83	0.01	0	0	0	0	0	0.66	0	0	0.18	0.36	0.31	0
Tmem215	0.05	0.13	0.84	0	0	0	0	0.25	0	0.35	0	0	0.25	0	0	0	0
Dzip1l	0	0.09	0	0	0.33	0	0	0	0	0	0	0.03	0.03	0	0	0.08	0
Shroom3	0.69	0	0	0.93	0	0	0	0	0	0	0.09	0	0	0.26	0	0.27	0
Ppp1r17	0	0	0	0	0	0	0	0	0	0	0	0	0	0	0	0	0
Myo9a	0	0	0	0	0	0	0	0	0	0	0	0	0	0	0	0	0
Tmem104	0	0	0	0	0	0	0	0	0	0	0	0	0	0	0	0	0
Trim44	0	0	0	0	0	0	0	0	0	0	0	0	0	0	0	0	0
Tacc2	0	0	0	0	0	0	0	0	0	0	0	0	0	0	0	0	0
Cbr3	0	0	0	0	0	0	0	0	0	0	0	0	0	0	0	0	0
Ifnar2	0	0	0	0	0	0	0	0	0	0	0	0	0	0	0	0	0
App	0.01	0	0	0.21	0.21	0	0.23	0.17	0.1	0	0.05	0.11	0	0	0	0	0
Mark3	0	0	0	0	0	0	0	0	0	0	0	0	0	0	0	0	0
Dnm1	0	0	0	0	0	0	0	0	0	0	0	0	0	0	0	0	0
Camta2	0	0	0	0	0	0	0	0	0	0	0	0	0	0	0	0	0
Mapk6	0	0	0	0	0.18	0	0	0	0	0	0	0	0	0	0.11	0.13	0
Ssbp3	0	0	0	0.08	0.04	0	0	0	0	0	0	0	0	0.15	0	0	0
Pitpnm3	0	0	0	0	0	0	0	0.1	0.18	0	0	0	0	0	0.08	0	0
Greb1	0.51	0.98	0.8	0	0	0	0	0	0	0	0	0	0	0	0	0.49	0
Eif2ak3	0	0	0	0	0	0	0	0	0	0	0	0	0	0	0	0	0
Klf13	0	0	0	0	0	0	0	0	0	0	0	0	0	0	0	0	0
Rftn1	0	0	0.4	0.33	0.52	0	0	0	0.24	0	0	0	0.15	0	0	0.17	0
Shisa9	0	0	0	0	0	0.4	0	0.42	0.32	0.39	0	0	0	0	0.21	0	0
Als2	0	0	0	0	0	0	0	0	0	0	0	0	0	0	0	0	0
Parp8	0.06	0	0.14	0.12	0.28	0	0	0	0	0	0	0	0	0	0	0.18	0
Slc9a5	0.18	0	0	0	0	0.05	0	0	0	0	0.08	0	0	0	0	0.06	0
Nme7	0	0	0	0	0	0	0	0	0	0	0	0	0	0	0	0	0
Vps53	0	0	0	0	0	0	0	0	0	0	0	0	0	0	0	0	0
Smc6	0	0	0	0	0	0	0	0	0	0	0	0	0	0	0	0	0
Lrmda	0.27	0.46	0.8	0.2	0.17	0	0	0	0	0	0	0	0	0	0	0.12	0
Sh3bp4	0.02	0	0	0.34	0	0	0.09	0	0	0	0.06	0	0.08	0	0.01	0	0.83
Iars	0	0	0	0	0	0	0	0	0	0	0	0	0	0	0	0	0
Atp11c	0	0	0	0	0	0	0	0	0	0	0.04	0	0.35	0	0	0.24	0
Mbnl2	0	0	0	0	0	0	0	0.1	0.07	0.09	0	0.28	0.27	0.15	0	0	0
Slc9a1	0	0	0	0	0	0	0	0	0	0	0	0	0	0	0	0	0
Cacna1g	0.52	0.49	0.43	0.47	0.04	0	0	0	0	0	0	0	0	0	0	0	0
Col26a1	0.4	0	0	0	0	0	0	0.06	0.83	0.07	0.14	0	0	0	0	0.02	0
B3galt5	0	0	0	0	0	0	0	0.14	0	0	0	0	0	0.08	0	0.05	0
Glipr1l2	0	0	0	0	0	0	0	0	0	0	0	0	0	0	0	0	0
Cblc	0	0	0	0	0	0	0	0	0	0	0	0	0	0	0	0	0
Ctsc	0	0	0	0	0	0	0	0	0	0	0	0	0	0	0	0	0
Luzp2	0.29	0	0.07	0.48	0	0	0.59	0	0	0	0.59	0.23	0.14	0	0	0	0
Prcp	0	0	0	0	0	0	0	0	0	0	0	0	0	0	0	0	0
Glra2	0.36	0.82	0.21	0.02	0	0	0	0	0	0.11	0	0	0	0	0.06	0.28	0
Pced1b	0	0	0	0	0	0	0	0	0	0	0	0	0	0	0	0	0
Dach1	0	0	0	0	0	0	0	0	0	0	0.9	0.95	0	0	0	0.06	0
Slc44a3	0	0	0	0	0	0	0	0	0	0	0	0	0	0	0	0	0
Marcksl1	0	0	0	0	0	0	0	0	0	0	0	0	0	0	0	0	0
Prkar2b	0	0	0	0	0	0.03	0	0	0.67	0	0	0	0	0	0	0.05	0
Ppp1r42	0	0	0	0	0	0	0	0	0	0	0	0	0	0	0	0	0
Tmtc1	0	0	0.12	0	0	0.11	0	0	0	0	0	0	0	0	0	0	0.07
Nos1ap	0	0	0	0	0	0.01	0.08	0	0.02	0	0.34	0	0	0	0	0	0
Stab2	0	0	0	0	0	0	0	0	0	0	0	0	0	0	0	0	0
Hbp1	0	0	0	0	0	0	0	0	0	0	0	0	0	0	0	0	0
Slc1a1	0	0	0	0	0	0	0	0	0	0	0	0	0	0	0	0	0
Sun3	0	0	0	0	0	0	0	0	0	0	0	0	0	0	0	0	0
Bcr	0	0	0	0	0	0	0	0	0	0	0	0	0	0	0	0	0
Ldb2	0	0	0	0	0	0	0	0.41	0.43	0.14	0.13	0.42	0	0.11	0.18	0	0.28
Agrn	0	0	0	0	0	0	0	0	0	0	0	0	0	0	0	0	0
Acta2	0	0	0	0	0	0	0	0	0	0	0	0	0	0	0	0	0
Chst8	0	0	0	0	0	0.4	0.41	0	0	0.48	0	0	0.42	0.07	0.16	0	0.18
Prkcg	0.47	0.38	0.37	0.38	0.08	0	0	0	0	0	0	0	0	0.03	0	0	0
Cpne8	0.32	0.44	0.41	0	0.52	0	0.2	0.55	0	0	0	0	0.04	0	0	0	0.13
Scube1	0.19	0.35	0.94	0.2	0.54	0	0	0	0	0	0	0	0	0	0.3	0.14	0
Tbc1d30	0	0	0	0	0	0	0	0	0	0	0	0	0	0	0	0	0
Nkain3	0.52	0.72	0.54	0.52	0.1	0	0.54	0	0	0	0.04	0	0	0.11	0	0.13	0
Rfx7	0	0	0	0	0	0	0	0	0	0	0	0	0	0	0	0	0
Epb41l5	0	0	0	0	0	0	0	0	0	0	0	0	0	0	0	0	0
Ahnak	0.45	0	0	0.72	0.72	0	0.34	0	0	0	0	0	0	0	0	0	0
Rgmb	0	0	0	0	0	0	0	0	0	0	0	0	0	0	0	0	0
Tmem19	0	0	0	0	0	0	0	0	0	0	0	0	0	0	0	0	0
Cerkl	0.64	0	0	0	0.71	0	0.41	0	0.48	0	0.11	0	0	0	0	0	0
Igsf8	0	0	0	0	0	0	0	0	0	0	0	0	0	0	0	0	0
Dlk1	0	0	0	0.97	0.75	0	0	0	0	0	0	0	0	0	0	0.63	0
Cfap69	0	0	0	0	0	0	0	0	0	0	0	0	0	0	0	0	0
Scube2	0	0	0	0.94	0	0	0	0	0	0	0	0.56	0.29	0.06	0	0.14	0
Crispld1	0	0	0	0	0	0	0	0	0	0	0.28	0.38	0.85	0	0	0.27	0
Strn3	0	0	0	0	0	0	0	0	0	0	0	0	0	0	0	0	0
Shisa5	0	0	0	0	0	0	0	0	0	0	0	0	0	0	0	0	0
Pgbd1	0	0	0	0	0	0	0	0	0	0	0	0	0	0	0	0	0
Slc50a1	0	0	0	0.23	0.05	0	0	0	0	0	0	0	0	0	0.12	0.12	0
Rgn	0	0	0	0	0	0	0	0	0	0	0	0	0	0	0	0	0
Fermt1	0	0	0	0	0	0	0	0	0.67	0.34	0	0	0.4	0	0	0	0.03
Git2	0	0	0	0	0	0	0	0	0	0	0	0	0	0	0	0	0
Fgfr1op	0	0	0	0	0	0	0	0	0	0	0	0	0	0	0	0	0
Ptgs2	0	0	0	0	0	0	0	0	0	0	0	0	0	0	0	0	0
Nf1	0	0.08	0.04	0.01	0	0	0	0	0	0	0.04	0	0	0	0.11	0.21	0
Epsti1	0	0	0	0	0	0	0.61	0.44	0.63	0	0	0	0	0	0.47	0.15	0.49
Dock9	0	0	0	0.02	0.07	0	0.02	0.05	0	0.05	0	0	0	0	0.16	0	0
Kcnk1	0	0	0	0	0	0	0	0	0	0	0	0	0	0	0	0	0
Pkn2	0	0	0	0	0	0	0	0	0	0	0	0	0	0	0	0	0
Ccser2	0	0	0	0	0	0	0	0	0	0	0	0	0	0	0	0	0
Ppfia1	0	0	0	0	0	0	0	0	0	0	0	0	0	0	0	0	0
Zcchc24	0	0	0	0	0	0	0	0	0	0	0	0	0	0	0	0	0
Etv1	0	0	0	0	0	0	0	0	0	0	0	0	0.77	0.99	0	0.2	0
Map2k4	0.09	0.13	0	0.11	0.11	0	0.05	0	0	0	0	0	0	0	0	0	0
Sema5b	0	0.19	0.37	0	0	0	0	0.18	0	0.47	0	0	0	0.08	0.07	0.15	0
Yes1	0	0	0	0	0	0	0	0	0	0	0	0	0	0	0	0	0
Tcerg1l	0	0	0	0	0.16	0.05	0	0.83	0	0	0.32	0	0	0	0	0	0
Ankrd31	0	0	0	0	0	0	0	0	0	0	0	0	0	0	0	0	0
Usp25	0.02	0.29	0	0	0.09	0	0.35	0	0	0	0	0	0	0.13	0	0.09	0.24
Enox2	0.19	0	0.11	0.39	0	0	0	0	0	0	0.17	0	0	0	0	0.52	0
Frem2	0	0	0	0	0	0	0	0	0	0	0	0	0	0	0	0	0
Spag9	0	0	0	0	0	0	0	0	0	0	0	0	0	0	0	0	0
Flrt3	0	0	0	0	0	0	0	0	0	0.03	0	0	0	0	0.18	0.25	0
Gsdme	0	0	0	0	0	0	0	0	0.08	0	0.49	0	0	0	0.35	0.26	0
Amigo2	0	0	0	0	0	0	0	0.73	0.68	0.37	0	0	0	0	0.49	0	0
Cnnm1	0	0	0	0	0	0	0	0	0	0	0	0	0	0	0	0	0
Rabl6	0	0	0	0	0	0	0	0	0	0	0	0	0	0	0	0	0
Larp4b	0	0	0	0	0	0	0	0	0	0	0	0	0	0	0	0	0
Gabra2	0.18	0.17	0.21	0.3	0.03	0.19	0.14	0	0.04	0	0	0	0	0.04	0	0	0.07
Cpq	0	0	0	0.01	0	0	0	0	0	0	0	0	0	0	0	0.61	0
Txnip	0	0	0	0	0	0	0	0	0	0	0	0	0	0	0	0	0
Zfhx2	0	0	0	0	0	0	0	0	0	0	0	0	0	0	0	0	0
Phf3	0	0	0	0	0	0	0	0	0	0	0	0	0	0	0	0	0
Nbeal1	0	0	0	0	0	0	0	0	0	0	0	0	0	0	0	0	0
Ptpra	0	0	0	0	0	0	0	0	0	0	0.04	0.07	0	0	0	0.09	0
Mkx	0	0	0.19	0.23	0.32	0	0	0.18	0	0.87	0.34	0.08	0	0	0	0	0
Grk3	0.03	0	0.08	0	0	0	0	0	0.06	0.06	0	0	0	0	0.06	0.02	0
Rnf165	0	0	0	0	0	0	0	0	0	0	0.01	0	0	0.54	0	0	0
Rgs12	0	0	0	0	0	0	0	0	0	0	0	0	0	0	0	0	0
Kremen1	0	0	0	0	0	0	0	0	0	0	0	0	0	0	0	0	0
Pik3c3	0	0	0	0	0	0	0	0	0	0	0	0	0	0	0	0	0
Nckap5	0	0	0	0.24	0.59	0	0.4	0.15	0	0	0	0	0	0	0	0.02	0.07
Kif13b	0	0	0	0	0	0	0	0	0	0	0	0	0	0	0	0	0
Cyld	0.1	0	0	0	0	0	0	0.03	0	0	0	0	0	0	0	0	0
Dgkb	0	0	0.08	0	0.01	0.13	0	0.06	0.21	0.22	0	0	0.15	0.14	0.23	0	0.01
Ttc39a	0	0	0	0	0	0	0	0	0	0	0	0	0	0	0	0	0
Dcaf6	0.01	0	0	0	0	0	0	0	0	0	0	0	0.11	0	0	0	0
Tle2	0.45	0.23	0.21	0	0	0.2	0	0	0	0.12	0	0	0	0	0	0	0
Sgpl1	0	0	0	0	0	0	0	0	0	0	0	0	0	0	0	0	0
Nrgn	0.5	0.43	0.48	0	0	0.8	0.27	0	0	0	0	0	0	0.4	0	0	0
Dcdc2a	0	0	0	0	0	0	0	0	0	0	0	0	0	0	0	0	0
Stk32c	0	0	0	0	0	0	0	0	0	0	0	0	0	0	0	0	0
P4ha3	0.02	0.03	0	0.13	0	0.87	0	0.01	0	0.09	0	0	0	0	0	0	0
Glt8d2	0.22	0	0	0.72	0.72	0	0	0	0	0	0.03	0.08	0.83	0	0	0	0
Tcf4	0	0	0	0	0	0	0	0	0	0	0.95	0.84	0	0	0	0.22	0
Gpat3	0	0	0	0	0	0	0	0	0	0	0	0	0	0	0	0	0
Cdh23	0	0	0	0	0	0	0	0	0	0	0	0	0	0	0	0	0
Arhgef28	0	0	0	0	0	0	0	0	0.17	0	0.09	0	0	0.03	0	0.28	0.22
Tmem241	0	0	0	0	0	0	0	0	0	0	0	0	0	0	0	0	0
Astn1	0.07	0.03	0.06	0.12	0.16	0	0	0	0	0	0	0	0.09	0.1	0	0.05	0
Gpc3	0	0.86	0.95	0	0	0	0	0.05	0.36	0	0	0	0	0	0	0.45	0
Dgkh	0	0.11	0	0.07	0	0	0.27	0	0	0.03	0	0	0	0.09	0	0	0
Nr2c1	0	0	0	0	0	0	0	0	0	0	0	0	0	0	0	0	0
Surf4	0	0	0	0	0	0	0	0	0	0	0	0	0	0	0	0	0
Stxbp5l	0.17	0.18	0.15	0.13	0.19	0.02	0	0.07	0	0	0	0	0.06	0.02	0	0	0
Tanc2	0.18	0.19	0.18	0.14	0.14	0.17	0.13	0.17	0.14	0	0	0	0	0	0	0.06	0
Mdga2	0.16	0.2	0	0	0	0.22	0	0.18	0.18	0.22	0.06	0	0.21	0.23	0.22	0.22	0
Tmod1	0	0	0	0	0	0	0	0	0	0	0	0	0	0	0	0	0
C2cd3	0	0	0	0	0	0	0	0	0	0	0	0	0	0	0	0	0
Trim17	0	0	0	0	0	0	0	0.19	0	0.74	0	0	0	0	0	0.13	0
Klhl14	0.96	0	0	0	0	0	0	0.32	0	0	0.18	0.67	0	0	0	0	0
Susd4	0.02	0	0.07	0	0.19	0.18	0	0.1	0.01	0.19	0	0	0	0	0	0	0.18
Pex5	0	0	0	0	0	0	0	0	0	0	0	0	0	0	0	0	0
Slc22a23	0	0	0	0	0	0.06	0	0.14	0	0	0	0	0	0	0.17	0	0
Prkcd	0	0	0	0	0	0	0	0	0	0	0	0	0	0	0	0	0
Mlxipl	0	0	0	0	0	0	0	0	0	0	0	0	0	0	0	0	0
Scn10a	0	0	0	0	0	0	0	0	0	0	0	0	0	0	0	0	0
Pkp4	0.16	0.21	0.08	0	0	0	0	0	0.06	0	0	0	0	0.33	0	0.19	0
Otud4	0	0	0	0	0	0	0	0	0	0	0	0	0	0	0	0	0
Lrrc8d	0	0	0	0	0	0	0	0	0	0	0	0	0	0	0	0	0
Cxxc4	0	0	0	0	0	0	0	0	0	0	0	0	0	0	0	0	0
C1galt1	0	0	0	0.05	0	0.08	0	0	0	0	0.01	0.05	0	0	0	0	0
Cygb	0	0	0	0	0	0	0	0	0	0	0	0	0	0.41	0.46	0.16	0
Glipr2	0	0	0	0	0	0	0.36	0	0.75	0	0	0.02	0.07	0	0	0.34	0
Dchs2	0	0	0	0	0	0.01	0	0	0	0	0	0.38	0.45	0.76	0	0	0
Nsun3	0	0	0	0	0	0	0	0	0	0	0	0	0	0	0	0	0
Asxl3	0	0.06	0	0.62	0.1	0	0	0	0	0	0	0	0.81	0	0.06	0.1	0
Cngb1	0	0	0	0	0	0	0	0.07	0.58	0.37	0	0	0	0.04	0	0.79	0
Thsd7a	0	0	0	0	0.14	0	0	0	0	0	0.7	0	0.2	0.48	0	0.66	0
Prss37	0	0	0	0	0	0	0	0	0	0	0	0	0	0	0	0	0
Ppp6r2	0	0	0	0	0	0	0	0	0	0	0	0	0	0	0	0	0
Pgm5	0	0	0	0	0	0	0	0	0	0	0	0	0	0	0	0	0
Sfxn4	0	0	0	0	0	0	0	0	0	0	0	0	0	0	0	0	0
Clstn2	0	0	0	0	0	0	0	0	0	0.24	0.53	0.44	0.59	0.1	0.42	0.16	0
Stk26	0.12	0.56	0.34	0	0	0.53	0.77	0	0.08	0	0	0	0	0.23	0	0.1	0
Cpne9	0.51	0	0.57	0.75	0.43	0	0	0	0	0	0	0	0	0	0	0.46	0
Trpv3	0	0	0	0	0	0	0	0	0	0	0	0	0	0	0	0	0
Gtf2i	0	0	0	0.04	0	0	0	0.05	0	0.09	0	0	0	0	0	0	0
Def6	0	0	0	0	0	0	0	0	0	0	0	0	0	0	0	0	0
Fat4	0.65	0.62	0.36	0	0.28	0.21	0.04	0	0	0	0.09	0.39	0	0	0	0	0
Nek5	0	0	0	0	0	0	0	0	0	0	0	0	0	0	0	0	0
Tram2	0	0	0	0	0	0	0	0	0	0	0	0	0	0	0	0	0
Kdr	0.39	0.12	0	0.34	0	0	0	0	0	0	0	0.89	0.29	0.04	0	0	0.65
Phactr3	0.09	0.02	0.1	0.15	0	0	0	0	0	0	0	0	0	0	0	0.02	0
Snrpa	0	0	0	0	0	0	0	0	0	0	0	0	0	0	0	0	0
Car11	0	0	0	0	0	0	0	0	0.3	0.36	0	0	0	0	0	0	0
Ppargc1b	0	0	0	0	0	0.02	0	0.03	0	0	0	0	0	0	0	0	0
Hltf	0	0	0	0	0	0	0	0	0	0	0	0	0	0	0	0	0
Coch	0.44	0.91	0.5	0	0	0	0	0.09	0	0	0	0	0	0	0	0.09	0
Glb1l3	0	0	0	0	0	0	0	0	0	0	0	0	0	0	0	0	0
Msmb	0	0	0	0	0	0	0	0	0	0	0	0	0	0	0	0	0
Limch1	0.09	0	0	0	0	0	0	0.19	0	0	0.08	0	0	0	0.02	0	0.03
Unc13b	0.25	0	0	0.02	0	0	0	0	0	0	0	0	0	0	0.07	0.34	0
Pgr	0.27	0.61	0.68	0	0	0	0	0	0	0	0	0.09	0	0.29	0	0.08	0
Fam126a	0	0	0	0	0	0.46	0.22	0.03	0.1	0.52	0	0	0	0	0.33	0	0.5
Kcnab1	0	0	0	0	0	0	0	0	0.61	0.37	0	0	0	0	0.32	0.22	0
Pcgf5	0.15	0.28	0	0	0	0	0	0.07	0	0	0	0	0	0	0	0.35	0
Srrm4	0.2	0.21	0.26	0.02	0.21	0	0	0.03	0.12	0	0	0	0	0	0	0	0
Camk1d	0.27	0.17	0.07	0	0	0	0	0	0	0	0	0	0	0	0	0	0.04
Tigar	0	0	0	0	0	0	0	0	0	0	0	0	0	0	0	0	0
9330182L06Rik	0	0	0	0	0.23	0	0	0	0	0.1	0	0	0.27	0	0	0.13	0
Pcdh15	0.02	0	0	0	0.2	0	0.21	0.2	0.28	0.23	0	0	0	0	0.1	0.06	0
Pik3ip1	0	0	0	0	0	0	0	0	0	0	0	0	0	0	0	0	0
Map2k6	0	0	0	0	0	0	0	0	0	0	0.21	0.27	0.07	0	0.25	0.09	0
Stk39	0	0	0	0	0	0	0	0	0	0.11	0	0	0	0	0.1	0.1	0
Capn2	0	0	0	0	0	0	0	0	0	0	0	0	0	0	0	0	0
Klhl5	0	0	0	0	0	0	0.14	0	0.21	0	0.07	0	0.23	0.43	0.45	0	0.49
Arhgef40	0	0	0	0.31	0.2	0	0	0	0	0	0	0	0	0	0	0	0
Ipo11	0	0	0	0	0	0	0	0.07	0	0	0	0	0	0	0	0	0
Ankrd34b	0	0	0	0	0	0.46	0	0.08	0.71	0.87	0	0	0	0.17	0	0	0
Gramd2	0	0	0	0	0	0	0	0	0	0	0	0	0	0	0	0	0
Atp7a	0	0	0.16	0	0	0	0	0	0.28	0.05	0.03	0	0	0	0	0.37	0
Scarf2	0	0	0	0	0	0	0	0	0	0	0	0	0	0	0	0	0
Rcor3	0	0	0	0	0	0	0	0	0	0	0	0	0	0	0	0	0
Slain1	0	0	0	0	0	0	0	0	0	0	0	0	0	0	0	0	0
Pomt2	0	0	0	0	0	0	0	0	0	0	0	0	0	0	0	0	0
Dip2c	0.05	0.16	0.14	0.2	0.01	0.12	0.01	0	0.04	0	0	0	0	0	0	0.03	0
Pkp2	0	0	0	0	0	0.26	0.44	0	0.26	0	0	0	0	0.33	0	0	0
Nrsn2	0	0	0	0	0	0	0	0	0	0	0	0	0	0	0	0	0
Gsg1l	0.03	0	0.43	0	0.5	0	0	0	0	0	0.74	0.28	0	0	0	0.11	0
Ppp2r2c	0	0	0	0	0	0	0	0	0	0	0	0	0	0	0	0	0
Mcph1	0	0	0	0	0	0	0	0	0	0	0	0	0	0	0	0	0
Necab1	0.97	0.53	0.34	0	0	0	0	0	0	0	0	0	0	0	0	0.55	0.26
Tgfb2	0	0	0	0	0.64	0	0	0.52	0	0.05	0	0	0	0	0	0.06	0
Stn1	0.73	0.26	0.39	0.11	0	0	0	0	0	0	0	0	0	0	0	0.09	0
Ralgapa2	0.11	0	0	0	0	0	0	0.38	0.07	0	0	0	0.04	0	0	0.03	0
Lhx2	0	0	0	0	0	0	0	0	0	0	0	0	0	0	0	0	0
Cep85l	0	0.02	0	0	0	0	0	0	0	0	0	0.21	0.7	0	0	0.11	0
Knstrn	0	0	0	0	0	0	0	0	0	0	0	0	0	0	0	0	0
Chd6	0.12	0.03	0	0	0.17	0.09	0.02	0	0	0	0	0	0	0	0	0	0
Hlf	0	0	0	0	0	0	0.26	0	0	0.17	0.01	0.76	0.03	0	0	0.56	0
Ywhaz	0	0	0	0	0	0	0	0	0	0	0	0	0	0	0	0	0
Dennd5a	0	0	0	0	0	0	0	0	0	0	0	0	0	0	0	0	0
Ptpn4	0	0.09	0.13	0	0	0	0	0	0	0	0	0	0.01	0.05	0	0.07	0
C1ql2	0	0	0	0	0	0	0.76	0	0.2	0	0.81	0	0	0	0	0.11	0.62
Ret	0	0	0	0	0	0	0	0	0	0	0	0	0	0	0	0	0
Ppm1l	0	0	0	0	0	0	0	0	0.15	0	0.77	0.18	0	0	0	0.09	0.14
Pld6	0	0	0	0	0	0	0	0	0	0	0	0	0	0	0	0	0
Ptprr	0	0	0	0	0	0.15	0	0.35	0	0.15	0	0	0.24	0.01	0	0	0
Sorbs1	0	0	0	0	0	0.06	0	0.18	0.06	0.13	0	0.01	0	0	0	0.15	0
Smoc1	0.02	0	0	0	0	0	0	0	0	0	0.61	0.74	0	0	0	0.2	0
Gucy1b1	0	0	0	0	0	0	0	0	0	0	0	0	0	0	0	0	0
Frmd3	0	0	0	0	0	0	0	0	0	0	0	0	0	0	0	0	0
Cacna2d1	0	0	0	0	0	0.11	0.19	0.21	0.24	0	0.28	0.26	0.24	0.21	0	0	0.22
Rfx4	0	0	0	0	0	0	0	0	0	0	0	0	0	0	0	0	0
Slc27a6	0	0	0	0	0	0	0	0	0	0	0	0	0	0	0	0	0
Dnah1	0	0	0	0	0	0	0	0	0	0	0	0	0	0	0	0	0
Arhgap22	0	0	0	0	0	0.06	0	0.06	0.77	0.65	0	0	0	0.23	0.19	0.1	0
Tmem178b	0.12	0.06	0.11	0	0.11	0	0	0.2	0.18	0	0	0	0	0	0.02	0	0
Traf3	0	0	0	0	0.07	0	0	0.08	0	0	0	0	0	0	0	0	0
Ehd3	0	0	0	0	0	0	0	0	0	0	0	0	0	0	0	0	0
Igf1	0	0	0.15	0	0.85	0	0	0	0	0	0	0	0.17	0.78	0	0.09	0.94
Galr1	0	0	0	0	0	0	0	0.76	0.25	0	0	0.68	0.79	0.02	0	0.17	0
Rap1gap	0	0	0	0	0	0	0	0	0	0	0	0	0	0	0	0	0
Prpf4b	0	0	0	0	0	0	0	0	0	0	0	0	0	0	0	0	0
Tenm4	0	0	0	0	0	0.11	0.23	0	0.45	0.13	0.08	0	0	0	0.07	0	0
Shc3	0	0.24	0	0	0	0	0.43	0	0	0	0.1	0	0	0	0	0.16	0.31
Lrmp	0	0	0	0	0	0	0	0	0	0	0	0	0	0	0	0	0
Maml2	0.09	0.06	0.5	0.44	0	0.06	0	0.49	0	0	0	0	0.16	0.3	0	0.22	0.04
Shtn1	0	0	0	0.02	0	0	0	0	0	0	0.13	0.4	0.01	0	0.22	0	0
Nptx1	0	0	0	0	0	0.82	0.34	0	0	0	0	0	0	0	0.42	0	0
Chst9	0.06	0.82	0.95	0	0	0	0	0	0	0	0	0.54	0	0	0	0	0
Nr4a1	0.23	0	0	0	0	0	0.59	0	0	0.09	0	0	0.29	0	0.08	0.15	0
Ankrd55	0	0	0	0	0	0	0.26	0	0	0	0	0	0.32	0.14	0	0.05	0.06
Alcam	0.51	0.2	0.4	0.54	0.09	0	0.57	0	0	0	0	0	0.27	0.13	0	0	0.18
Snap91	0	0	0	0	0.18	0	0	0	0	0	0	0	0.07	0.03	0	0.08	0
Sh3pxd2a	0.46	0.05	0	0	0	0	0	0.08	0	0	0	0.08	0.19	0.02	0	0.15	0
Grm8	0.62	0.37	0.11	0.08	0.25	0.23	0.2	0	0.11	0	0.1	0	0	0	0	0.13	0.3
Sc5d	0	0	0	0	0	0	0	0	0	0	0	0	0	0	0	0	0
Rerg	0	0	0	0	0	0	0	0	0.38	0	0.21	0	0	0	0.02	0	0.21
Ctsh	0	0	0	0	0	0	0	0	0	0	0	0	0	0	0	0	0
Rad9a	0	0	0	0	0	0	0	0	0	0	0	0	0	0	0	0	0
Kdm4b	0	0	0	0	0	0	0	0	0	0	0	0	0	0	0	0	0
Irs2	0	0.49	0	0	0	0	0	0	0	0	0	0	0	0.02	0	0.07	0
Trabd2b	0	0	0	0	0	0	0	0	0	0	0	0	0	0	0	0	0
Epb41l2	0.54	0	0	0.42	0.72	0	0	0.04	0	0	0	0	0	0	0	0	0
Erlec1	0	0	0	0	0	0	0	0	0	0	0	0	0	0	0	0	0
Nos1	0.79	0.72	0.9	0	0.26	0	0	0	0	0	0	0	0	0	0	0.07	0
Atp2b1	0.05	0.19	0.12	0	0	0	0	0	0	0	0.12	0	0.2	0	0	0.21	0
Brf1	0	0	0	0	0	0	0	0	0	0	0	0	0	0	0	0	0
Cyp7b1	0	0	0	0	0.06	0	0	0	0	0	0	0	0.71	0.55	0	0.13	0
Bcl2	0	0	0	0	0	0	0.02	0	0	0	0.51	0.63	0	0	0	0.57	0.04
Pacs2	0	0	0	0	0	0	0	0	0	0	0	0	0	0	0	0	0
Inpp4b	0	0	0.28	0	0.09	0	0.08	0.51	0	0.43	0	0	0.09	0.47	0.07	0.21	0
Palmd	0	0	0	0	0	0.02	0.34	0.34	0.1	0.24	0	0.1	0.23	0.3	0	0	0
Gltp	0	0	0	0	0	0	0	0	0	0	0	0	0	0	0	0	0
Vat1l	0.17	0.05	0	0.04	0	0.01	0	0.1	0	0	0	0	0.15	0.43	0	0.1	0
Kcnq3	0	0	0	0	0	0.14	0.17	0.2	0	0	0	0.19	0.26	0.36	0	0	0.14
Itpr1	0	0	0	0	0	0	0	0.71	0.64	0.54	0	0.07	0	0.55	0	0	0
Mllt3	0.17	0.14	0.18	0.05	0.16	0	0	0.09	0	0	0	0	0	0	0	0.11	0
Nudt18	0	0	0	0	0	0	0	0	0	0	0	0	0	0	0	0	0
Rph3a	0	0	0	0	0	0	0	0.03	0.06	0.06	0.62	0	0	0	0.04	0.63	0.46
Osbpl2	0	0	0	0	0	0	0	0	0	0	0	0	0	0	0	0	0
Zmym3	0	0	0	0	0	0	0	0	0	0	0	0	0	0	0	0	0
Pcbp3	0	0	0.23	0	0	0	0	0	0	0	0	0.19	0	0	0	0.11	0
Dcbld1	0	0	0	0.03	0	0	0	0	0.14	0	0	0	0.01	0.27	0.27	0.17	0.67
Tjp1	0.12	0.05	0.08	0	0	0	0	0.15	0.1	0	0.01	0	0	0	0.06	0.09	0
Gphn	0.2	0.19	0.2	0.12	0	0.14	0.19	0.14	0.17	0	0.15	0	0	0.09	0	0	0
Csrp2	0	0	0	0	0	0	0	0	0	0	0	0	0	0	0	0	0
Ccdc122	0	0	0	0	0	0	0	0	0	0	0	0	0	0	0	0	0
Alox15	0	0	0	0	0	0	0	0	0	0	0	0	0	0	0	0	0
Dock7	0	0	0	0	0	0	0	0	0	0	0.07	0.11	0	0.09	0	0	0
Ptchd4	0	0.35	0.21	0	0	0.14	0	0	0	0	0.16	0.1	0.03	0	0	0.09	0.18
Cntrl	0	0	0.14	0	0	0	0	0.21	0.47	0	0	0	0	0	0	0	0
Filip1l	0	0	0	0	0	0	0	0	0.07	0	0	0	0	0	0	0.12	0.35
Trpc4	0	0.9	0.12	0	0	0	0	0	0	0	0.67	0	0	0.5	0	0.23	0.28
Osbpl11	0	0	0	0	0	0	0	0	0	0	0	0	0	0	0	0	0
Dis3l	0	0	0	0	0	0	0	0	0	0	0	0	0	0	0	0	0
Ppp2r5e	0	0	0	0	0	0	0	0	0	0	0	0	0	0	0	0	0
Runx1t1	0.36	0.68	0.57	0.52	0.41	0	0	0	0	0	0	0	0	0.64	0	0.41	0
Tmtc4	0	0	0	0	0	0	0	0	0	0	0	0	0	0	0	0	0
Acer3	0	0	0	0	0	0	0	0	0	0	0	0	0	0	0	0	0
Map4k1	0	0	0	0	0	0	0	0	0	0	0	0	0	0	0	0	0
Rabep1	0	0	0	0	0	0	0	0	0	0	0	0	0	0	0	0	0
Trrap	0	0	0	0	0	0	0	0	0	0	0	0	0	0	0	0	0
Tom1l2	0	0	0	0	0	0	0	0	0	0	0	0	0	0	0	0	0
Rbfox1	0	0	0	0	0	0.25	0.22	0.24	0.25	0.25	0	0	0.2	0.24	0.23	0	0.22
Tdg	0	0	0	0	0	0	0	0	0	0	0	0	0	0	0	0	0
Ptprs	0	0	0	0	0	0	0	0	0	0	0	0	0	0	0	0	0
Snx7	0	0	0	0	0	0	0	0.07	0	0	0	0	0.87	0.02	0	0.27	0
Limd1	0	0	0	0	0	0	0	0	0	0	0	0	0	0	0	0	0
Eml5	0	0	0	0	0	0	0	0	0	0	0	0	0	0	0	0	0
Tbc1d15	0	0	0	0	0	0	0	0	0	0	0	0	0	0	0	0	0
Grin2d	0	0	0.01	0	0.16	0	0	0	0	0	0	0	0	0	0.04	0	0
Plag1	0	0	0	0	0	0	0	0	0	0	0	0	0	0	0	0	0
Tdrd5	0	0	0	0	0	0	0	0.21	0	0.89	0	0	0.32	0.17	0.46	0.05	0
Chd9	0	0	0	0	0	0	0	0	0	0	0	0	0	0	0	0	0
Sardh	0	0	0	0	0	0	0	0	0	0	0	0	0	0	0	0	0
Kcng3	0.67	0.65	0.31	0	0	0.37	0	0	0	0	0	0	0.17	0.37	0	0	0
Klhl1	0	0.52	0.51	0	0	0.94	0.1	0	0	0	0	0.11	0	0	0	0.23	0
Cpeb3	0	0	0	0	0	0	0	0.13	0.02	0.16	0	0.04	0	0.15	0	0.16	0
Dcx	0	0	0	0.39	0.11	0	0	0	0	0	0	0	0	0	0	0	0
Ube2cbp	0	0	0	0	0	0	0.28	0	0.11	0	0	0	0	0.42	0.4	0.09	0.05
Ankar	0	0	0	0	0	0	0	0	0	0	0	0	0	0	0	0	0
Drp2	0	0	0	0	0	0	0.02	0	0.55	0	0	0	0	0.27	0	0	0
Lama3	0.05	0	0	0	0.15	0	0.21	0	0	0.12	0	0	0.73	0	0	0.33	0
Cxadr	0	0	0	0	0	0	0	0	0	0	0	0	0.17	0	0	0.02	0
Rapgef6	0	0	0	0	0.02	0.04	0.05	0	0	0	0	0	0	0.06	0.13	0.17	0
Katnal2	0.34	0	0	0.22	0.2	0	0	0	0	0	0	0	0	0	0	0.09	0
Mcu	0	0	0	0	0	0	0.21	0	0	0	0	0	0	0.02	0	0.01	0.11
Plcb4	0	0	0	0	0	0	0	0.52	0.44	0	0.24	0.3	0.27	0.53	0	0.02	0.15
Gabra5	0	0	0	0	0	0	0	0.27	0.37	0.12	0	0	0	0.24	0.13	0	0
Tmem74	0	0	0	0	0	0	0	0	0	0	0	0	0	0	0	0	0
Scml4	0.09	0.4	0.49	0.41	0.52	0	0	0	0	0	0	0	0	0.23	0	0.34	0
Egr4	0	0	0	0	0	0	0	0	0	0	0	0	0	0	0	0	0
Emb	0.11	0.04	0.24	0	0.3	0	0.02	0	0	0	0	0	0	0	0	0.01	0
Nfatc1	0	0	0	0	0	0	0	0	0	0	0	0	0	0	0	0	0
Pcdh9	0.19	0	0	0.06	0	0	0	0.39	0	0.32	0.21	0.29	0.22	0	0.24	0.22	0
Strip2	0	0	0	0	0	0.41	0.15	0	0	0.88	0	0	0	0.48	0	0	0
Clvs1	0	0	0	0	0	0	0	0	0	0	0	0	0	0	0	0	0
Grm5	0	0	0	0.18	0	0.24	0.24	0.25	0.2	0.25	0	0.21	0.23	0.25	0.24	0	0.23
Tmco3	0	0	0	0	0	0	0	0	0	0	0	0	0	0	0	0	0
B4galnt4	0	0	0	0	0	0	0	0	0	0	0	0	0	0	0	0	0
Rims1	0.1	0.18	0	0.11	0.17	0.08	0.18	0	0.08	0	0.2	0	0.05	0.16	0.12	0.18	0
C2cd5	0	0	0	0	0	0	0	0	0	0	0	0	0	0	0	0	0
Adra1a	0	0	0	0.82	0	0.53	0.73	0	0	0.05	0	0	0	0	0	0.19	0.45
Cntnap4	0	0.08	0	0.63	0.38	0	0.8	0	0	0	0.39	0	0.15	0	0	0	0.33
Thbs3	0	0.03	0.21	0.22	0	0	0	0	0	0	0	0	0	0.17	0	0.06	0
Prdm8	0	0	0	0	0	0	0	0	0	0	0	0	0	0	0	0	0
Hmgcs1	0	0	0	0	0.03	0	0	0	0	0.31	0	0	0	0	0	0.15	0
D10Wsu102e	0	0	0	0	0	0	0	0	0	0	0	0	0	0	0	0	0
Trpc5	0.48	0.52	0.76	0	0	0	0.44	0	0	0	0	0	0	0.02	0	0.25	0.3
Osbpl9	0	0	0	0	0	0.08	0.02	0	0.12	0.21	0	0.15	0.12	0.02	0.17	0	0.15
Pgp	0	0	0	0	0	0	0	0	0	0	0	0	0	0	0	0	0
Gnai1	0.39	0.05	0	0	0	0	0	0	0	0	0	0	0	0	0	0	0
Igfbp7	0	0	0	0	0	0	0	0	0	0	0	0	0	0	0	0	0
Stxbp4	0	0	0	0	0	0	0	0	0	0	0	0	0	0	0	0	0
Rpusd3	0	0	0	0	0	0	0	0	0	0	0	0	0	0	0	0	0
Anxa3	0	0	0	0	0	0	0	0	0	0	0	0	0	0	0	0	0
Wasf1	0	0	0	0	0	0	0	0	0	0	0	0	0	0	0	0	0
Apc	0	0	0	0	0	0	0	0.04	0.07	0.11	0	0.03	0.15	0.1	0.01	0.15	0
Hydin	0	0	0	0	0	0.09	0	0.74	0.92	0.8	0	0	0.35	0	0	0	0
Hsd17b11	0	0	0	0	0	0	0	0	0	0	0	0	0	0	0	0	0
Prnp	0	0	0	0	0	0	0	0	0	0	0	0	0	0	0	0	0
Shh	0	0	0	0	0.2	0	0	0.31	0.14	0.31	0.06	0	0	0.24	0.36	0.01	0.08
Fto	0	0	0	0	0	0	0	0	0	0	0	0	0	0	0	0	0
Gch1	0	0	0	0	0	0	0	0	0	0	0	0	0	0	0	0	0
Pla2g6	0	0	0	0	0	0	0	0	0	0	0	0	0	0	0	0	0
Klf7	0.05	0	0	0	0	0	0	0	0	0	0.04	0	0.03	0.04	0	0.22	0
Atp8b4	0	0	0	0	0	0	0	0	0	0	0	0	0	0	0	0	0
Zfp366	0	0	0	0	0	0	0	0	0	0	0	0	0	0	0	0	0
Dlst	0	0	0	0	0	0	0	0	0	0	0	0	0	0	0	0	0
Rala	0	0	0	0	0	0	0	0	0	0	0	0	0	0	0	0	0
Pir	0	0	0	0	0	0	0	0	0	0	0	0	0	0	0	0	0
Gabre	0	0	0	0.75	0.81	0	0.43	0	0	0	0	0	0	0.19	0	0.44	0
Ctbp1	0	0	0	0	0	0	0	0	0	0	0	0	0	0	0	0	0
Rgs9	0	0	0.18	0.39	0.31	0	0	0	0	0	0	0	0.2	0	0	0.02	0
Ddx10	0	0	0	0	0	0	0	0	0	0	0	0	0	0	0	0	0
Ivns1abp	0	0	0	0	0.34	0	0	0.03	0	0	0	0	0	0	0.13	0.1	0
Kcnh1	0.18	0	0.11	0	0	0.44	0	0	0	0	0	0	0.04	0.42	0.05	0	0
Plin5	0	0	0	0	0	0	0	0	0	0	0	0	0	0	0	0	0
Atp7b	0	0	0	0.91	0.18	0	0.29	0	0	0	0	0	0.18	0.4	0	0	0
Pcyt1b	0	0	0	0	0	0	0	0	0	0	0	0	0	0	0	0	0
Rmdn1	0	0	0	0	0	0	0	0	0	0	0	0	0	0	0	0	0
Ttc39c	0	0	0	0	0	0	0	0.21	0	0	0	0	0.23	0.59	0	0.01	0.07
Tet2	0	0.06	0	0	0	0	0	0	0	0	0	0	0.16	0	0	0.29	0
Diaph3	0	0.07	0	0	0	0	0	0.28	0.19	0	0	0	0.05	0	0	0.28	0
Dpp10	0.32	0	0	0	0	0	0.16	0	0.1	0	0.17	0	0.1	0.15	0.22	0.1	0
Ppp2r5b	0	0	0	0	0	0	0	0	0	0	0	0	0	0	0	0	0
Eya1	0	0	0	0	0	0	0	0	0	0	0.03	0.96	0.22	0.82	0	0.17	0
Htt	0	0	0	0	0	0	0	0	0	0	0	0	0	0	0	0	0
Amelx	0	0	0	0.83	0	0.45	0	0	0.75	0.56	0	0	0	0	0	0.24	0
Ccdc85a	0	0.09	0	0	0	0.08	0.04	0	0	0.19	0	0	0.22	0.18	0	0.07	0
Pbx1	0.05	0	0.13	0	0	0	0	0.23	0	0.18	0	0.19	0.26	0.22	0	0	0
Arhgap24	0.46	0.47	0	0	0	0.08	0.11	0	0.2	0	0.28	0	0	0	0	0.17	0
Hdac4	0.13	0.04	0.06	0	0	0	0	0.02	0	0	0	0.1	0.02	0	0	0.13	0
Tulp4	0	0	0	0	0	0	0	0	0	0	0	0	0	0	0	0	0
Stk40	0	0	0	0	0	0.43	0	0	0	0.34	0	0	0	0.28	0	0	0
Acap3	0	0	0	0	0	0	0	0	0	0	0	0	0	0	0	0	0
Rflna	0	0	0	0	0	0	0	0	0	0	0	0	0	0	0	0	0
Rhbdl3	0	0	0	0	0	0	0	0	0	0.34	0	0	0.3	0	0.27	0	0.39
Pacs1	0.08	0	0	0.08	0	0	0	0	0	0	0	0	0	0	0.16	0.04	0
Mrpl3	0	0	0	0	0	0	0	0	0	0	0	0	0	0	0	0	0
Gadd45g	0.41	0	0	0	0	0	0	0	0	0	0	0	0	0.19	0	0.16	0
Abat	0	0	0	0	0	0	0	0	0.05	0.1	0	0	0	0.09	0	0.19	0
Pag1	0	0	0	0	0.05	0	0	0	0.12	0	0	0	0	0	0.07	0	0
Lrrn1	0	0	0	0	0	0.25	0.43	0.32	0.26	0	0	0.09	0	0	0	0.02	0.26
Cttn	0	0	0	0	0	0	0	0	0	0	0	0	0	0	0	0	0
Tert	0	0	0	0	0	0	0	0	0	0	0	0	0	0	0	0	0
Fam20a	0	0	0	0	0	0	0	0	0	0	0	0	0	0	0	0	0
Map1b	0	0	0	0	0.06	0.12	0.16	0.17	0.21	0.2	0	0	0	0.21	0.02	0.16	0
Kdm3a	0	0	0	0	0	0	0	0	0	0	0	0	0	0	0	0	0
Parva	0	0.02	0	0	0	0	0.13	0	0	0	0.77	0	0	0	0.58	0	0.5
Dennd3	0.32	0.37	0	0	0	0	0	0	0	0	0	0	0	0	0.05	0.3	0
Cars2	0.13	0.12	0.37	0	0	0	0	0	0	0	0	0	0	0	0	0	0
Nrip1	0	0	0	0	0.43	0	0	0	0	0	0	0.17	0	0	0.35	0.07	0
Fam98a	0	0	0	0	0	0	0	0	0.02	0.26	0	0	0	0	0	0.06	0
Erich3	0	0	0	0	0	0	0	0	0	0	0	0	0	0	0	0	0
Ush1c	0.9	0.66	0.78	0.11	0	0	0.09	0	0	0	0	0	0	0	0	0.07	0
Il1r1	0.39	0	0	0	0	0.3	0	0	0.45	0.88	0	0	0	0	0	0.44	0
Itfg1	0.05	0	0	0	0	0	0	0	0	0	0	0.13	0	0	0	0.21	0
Nfx1	0	0	0	0	0	0	0	0	0	0	0	0	0	0	0	0	0
Orc2	0	0	0	0	0	0	0	0	0	0	0	0	0	0	0	0	0
Pdp1	0	0	0	0	0	0	0	0	0	0	0	0	0	0	0	0	0
Epha4	0	0	0	0.45	0	0.38	0	0	0	0	0.07	0	0.41	0.14	0.33	0	0.13
Paqr8	0	0	0.06	0.09	0	0	0	0	0	0	0	0	0.08	0.82	0	0.13	0
Rock1	0	0	0	0	0	0	0	0	0	0	0	0	0	0	0	0	0
Nrp1	0	0	0.33	0.85	0	0	0	0	0	0	0.15	0.82	0.22	0.56	0	0.71	0
Tmem131l	0	0	0	0	0	0	0	0	0	0	0	0	0	0	0	0	0
Tsta3	0	0	0	0	0	0	0	0	0	0	0	0	0	0	0	0	0
Ar	0.32	0.28	0.33	0.17	0.36	0.27	0.41	0	0	0	0	0	0	0.2	0	0	0
Nrxn3	0	0.11	0	0.18	0.09	0	0.08	0.17	0	0	0	0	0	0.36	0	0.53	0
Lef1	0	0	0	0	0	0	0	0	0	0	0	0	0	0	0	0	0
Atl2	0	0	0	0	0	0	0	0	0	0	0	0	0	0	0	0	0
Nfib	0	0	0	0	0	0	0	0	0	0	0.97	0.96	0	0	0	0.3	0.16
Srebf2	0.04	0	0	0	0	0	0	0	0	0	0	0	0	0	0	0.2	0
Amotl2	0	0	0	0	0	0	0	0	0	0	0	0	0	0	0	0	0
Hunk	0.15	0	0.23	0.95	0.61	0	0	0	0	0	0.48	0.16	0	0	0	0.44	0
Fndc5	0	0	0	0	0	0	0	0	0	0	0	0	0	0	0	0	0
Aff3	0	0	0	0.01	0	0.05	0.12	0.12	0	0	0	0	0	0.19	0	0	0.06
Cc2d2a	0	0	0	0	0	0	0	0.06	0	0	0.31	0	0	0	0	0.08	0.01
Slc4a7	0	0	0	0	0	0	0	0	0	0	0.14	0.06	0	0	0	0	0
Dpp6	0	0	0	0	0.16	0	0.19	0	0.17	0.07	0.21	0.12	0	0	0.21	0.21	0.07
Mtm1	0	0	0	0	0	0	0	0	0	0	0	0	0	0	0	0	0
Nova1	0	0	0	0.15	0.18	0	0.14	0	0	0	0.03	0	0	0.07	0.21	0	0
Hfm1	0	0	0	0	0	0	0	0	0	0	0	0	0	0	0	0	0
Grtp1	0	0	0	0	0	0	0	0	0	0	0	0	0	0	0	0	0
Dram1	0	0	0	0	0	0	0	0	0	0	0	0	0	0	0	0	0
Nrp2	0.51	0.54	0.5	0	0	0	0	0	0	0	0.34	0.62	0	0.11	0	0.39	0
Plcl1	0	0	0.32	0.66	0.12	0.09	0.5	0	0	0	0	0	0.08	0.33	0	0	0
Abcg1	0	0	0	0	0	0	0.12	0	0.13	0	0	0	0	0	0	0	0
Cnbd1	0	0	0	0	0	0	0	0	0	0	0	0	0	0	0	0	0
Ttc12	0	0	0	0	0	0	0	0	0	0	0	0	0	0	0	0	0
Pcdh17	0.5	0.64	0.51	0.4	0.22	0.09	0	0	0	0	0	0	0	0	0	0.14	0
Sema3e	0.43	0.97	0	0	0	0	0	0	0	0	0	0	0	0	0.07	0.21	0
Igdcc3	0	0	0	0	0	0	0	0	0	0	0	0	0	0	0	0	0
Ccdc134	0	0	0	0	0	0	0	0	0	0	0	0	0	0	0	0	0
Arntl2	0	0	0.05	0	0	0	0	0.42	0.24	0	0	0	0	0	0	0.03	0
Patj	0	0	0	0	0	0	0	0	0	0	0.46	0.6	0	0.26	0	0	0
Unc93b1	0	0	0	0	0	0	0	0	0	0	0	0	0	0	0	0	0
Musk	0	0	0	0	0	0	0	0	0	0	0	0	0	0	0	0	0
Dpyd	0.16	0	0.23	0	0.22	0.18	0	0.45	0.56	0.44	0	0	0	0	0	0.19	0
Npl	0	0	0	0	0	0	0	0	0	0	0	0	0	0	0	0	0
Abca3	0	0	0	0	0	0	0	0	0	0	0	0	0	0	0	0	0
Doc2b	0	0	0	0	0	0	0	0.49	0.26	0.77	0.36	0	0	0.1	0.04	0	0
Maats1	0	0	0	0	0	0	0	0	0	0	0	0	0	0	0	0	0
Trim75	0	0	0	0	0	0	0	0	0	0	0	0	0	0	0	0	0
Iqca	0	0	0	0	0	0	0	0	0	0	0	0	0	0	0	0	0
Pcolce2	0	0	0	0	0	0	0	0	0	0	0	0	0	0	0	0	0
Spint1	0.55	0	0	0	0.76	0.37	0	0.55	0.21	0	0	0	0	0.45	0	0	0
Vat1	0	0	0	0	0	0	0	0	0	0	0	0	0	0	0	0	0
Heca	0	0.05	0.2	0	0	0	0	0	0	0	0	0.26	0.48	0	0	0.04	0
Tmem47	0	0	0	0.01	0	0	0	0	0	0	0	0	0.04	0	0	0	0.21
Grk5	0	0	0	0.18	0	0	0	0	0	0	0	0	0.5	0	0.14	0.11	0
Tmem131	0	0	0	0	0	0	0	0	0	0	0	0	0	0	0	0	0
Pappa2	0	0	0	0	0	0	0	0	0	0	0	0	0	0	0	0	0
Alox12	0	0	0	0	0	0	0	0	0	0	0	0	0	0	0	0	0
Vopp1	0	0	0	0	0	0	0	0	0	0	0	0	0	0	0	0	0
Adgrl2	0.17	0.09	0	0	0.21	0.16	0	0.43	0	0.25	0	0	0	0	0	0	0
Nsdhl	0	0	0	0	0	0	0	0	0	0	0	0	0	0	0	0	0
Trpm6	0	0	0	0	0	0	0	0	0	0	0	0	0	0	0	0	0
Adamts1	0	0	0	0	0	0	0	0	0	0	0	0	0	0	0	0	0
Babam2	0	0	0	0	0	0	0	0	0	0	0	0	0	0	0	0	0
Col3a1	0	0	0	0	0	0	0	0	0	0	0	0	0	0	0	0	0
Gpr158	0	0	0	0.16	0	0	0.09	0	0	0	0.1	0.16	0.1	0.14	0.06	0.19	0.11
Psd3	0.12	0	0	0	0	0	0	0.6	0	0.16	0	0	0	0	0.18	0.14	0
Prep	0	0	0	0	0	0	0	0	0	0	0	0	0	0	0	0	0
Tle3	0	0	0	0	0	0	0	0	0	0	0	0	0	0	0	0	0
C530008M17Rik	0	0	0	0.11	0	0	0	0	0	0	0	0.01	0.2	0.13	0	0.02	0
Ndn	0	0	0	0	0	0	0	0	0	0	0.23	0.16	0	0	0	0	0.16
Adgrv1	0	0	0	0	0.15	0.27	0	0	0.71	0.03	0	0	0	0	0.4	0.19	0
Lnpep	0	0	0	0	0	0	0	0	0	0	0	0	0	0	0	0	0
Traf3ip1	0	0	0	0	0	0	0	0	0	0	0	0	0	0	0	0	0
Sept11	0	0	0	0	0	0.12	0	0.22	0.47	0.59	0	0	0	0	0	0	0
Tpst1	0	0	0	0	0	0	0	0	0	0	0.2	0.07	0	0	0	0.23	0
Cyth1	0	0	0	0	0	0	0	0	0	0	0	0	0	0.36	0	0	0
Slc44a5	0.48	0.42	0.21	0	0.29	0	0	0	0	0	0	0	0	0	0	0.36	0
Mgst2	0	0	0	0	0	0	0	0	0	0	0	0	0	0	0	0	0
Pds5b	0	0	0	0	0	0	0	0	0	0	0	0	0.29	0	0.2	0	0.1
Afap1l2	0	0	0	0	0	0	0	0	0	0	0	0	0	0	0	0	0
Sytl4	0	0	0	0	0	0.11	0.31	0	0.48	0.86	0.26	0	0	0	0.49	0.35	0
Cdkl5	0	0.31	0.35	0	0	0	0	0	0	0	0.45	0.55	0.33	0	0	0.03	0
Pik3c2b	0	0	0	0	0	0	0	0	0	0	0	0	0	0	0	0	0
Frmd5	0.21	0	0.13	0	0.16	0.18	0	0	0	0	0	0	0	0	0.13	0.16	0
Adcy9	0	0	0	0	0	0	0	0	0	0	0	0	0	0	0	0	0
Rgs2	0	0	0.39	0	0.11	0	0.05	0	0	0	0	0	0	0	0.04	0	0
Scarb1	0	0	0	0	0	0	0	0	0	0	0	0	0	0	0	0	0
Fez2	0	0	0	0	0	0	0	0	0	0	0	0	0	0	0	0	0
Trim25	0	0	0	0	0	0	0	0	0	0	0	0	0	0	0	0	0
[truncated: 2,904 more rows]
